# Supplementary material for: Thiocyanate promoted difunctionalization and cyclization of unsaturated C–C bonds to construct 1-sulfur-2-nitrogen-functionalized alkenes and 2-thiocyanate indolines
Source: Royal Society of Chemistry journal article supplement (doi:10.1039/d3ob01864d), 2024-01-01
Supplement: d3ob01864d1.pdf [file d3ob01864d1.pdf]

# Thiocyanate promoted difunctionalization and cyclization of unsaturated C-C bonds to construct 1-sulfur-2-nitrogen- functionalized alkenes and 2-thiocyanate indolines

Hong Qin<sup>a</sup>, Feng Chen<sup>a</sup>, Jinze Du<sup>a</sup>, Xiaobing Yang<sup>b</sup>, Yiping Huang<sup>c</sup>, Kai Zhu<sup>c</sup>, Changhai Yue<sup>c</sup>, Zheng Fang<sup>\*a,d</sup>, Kai Guo<sup>a,d</sup>

<sup>a</sup>*Biotechnology and Pharmaceutical Engineering, Nanjing Tech University, 30 Puzhu Rd S., Nanjing, China, 211816.*

<sup>b</sup>*Institute of Nanjing Advanced Biomaterials & Processing Equipment, Nanjing, P. R. China, 210031.*

<sup>c</sup>*China Construction Industrial & Energy Engineering Group, Nanjing 210023, China.*

<sup>d</sup>*State Key Laboratory of Materials-Oriented Chemical Engineering, 30 Puzhu Rd S., Nanjing, China, 211816.*

## Table of Contents

|                                                                                |           |
|--------------------------------------------------------------------------------|-----------|
| <b>1. General Information</b>                                                  | <b>2</b>  |
| <b>2. Experimental section</b>                                                 | <b>2</b>  |
| <b>2.1 General Procedure for the synthesis of starting materials</b>           | <b>2</b>  |
| <b>2.2 General Procedure for the synthesis of product 3 and product 5</b>      | <b>3</b>  |
| <b>2.3 Gram-scale synthesis of 3a</b>                                          | <b>4</b>  |
| <b>2.4 General Procedure for the synthesis of product 7</b>                    | <b>5</b>  |
| <b>2.5 Characterization data</b>                                               | <b>5</b>  |
| <b>3. References</b>                                                           | <b>17</b> |
| <b>4. <sup>1</sup>H NMR, <sup>19</sup>F NMR and <sup>13</sup>C NMR spectra</b> | <b>18</b> |

## 1. General Information

Unless otherwise indicated, all commercially available chemicals were used without purification.  $^1\text{H}$  NMR (400 MHz),  $^{13}\text{C}$  NMR (100 MHz) and  $^{19}\text{F}$  NMR (376 MHz) were measured on 400 M spectrometer. The chemical shifts are given in parts per million (ppm) on the delta ( $\delta$ ) scale.  $^1\text{H}$  NMR chemical shifts were determined relative to internal TMS at  $\delta$  0.0 ppm.  $^{13}\text{C}$  NMR chemical shifts were determined relative to  $\text{CDCl}_3$  at  $\delta$  77.00 ppm. The following abbreviations were used to explain multiplicities: s = singlet, d = doublet, dd = doublet of doublet, t = triplet, td = triplet of doublet, q = quartet, m = multiplet, and br = broad. Analytical TLC was performed on 0.2 mm coated silica gel plates and visualized the course of the reactions using a UV light 254 nm. High-resolution mass spectra (HRMS) were obtained on an Agilent mass spectrometer using ESI-TOF (electrospray ionization-time of flight).

## 2. Experimental section

### 2.1 General Procedure for the synthesis of starting materials<sup>1-4</sup>

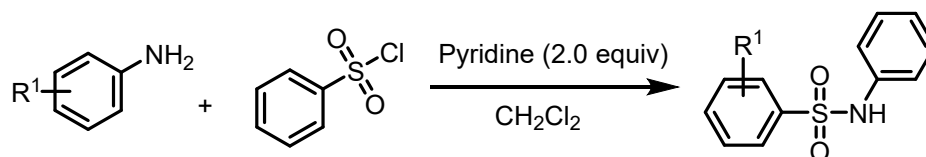

In an oven-dried flash (100 mL), the solution of aniline (465.7 mg, 5 mmol) in DCM (6 mL) were added pyridine (791 mg, 10 mmol) and TsCl (1.91 g, 10 mmol). The resulting solution was stirred for 2 h. Then the mixture was quenched with saturated NH<sub>4</sub>Cl solution, extracted with DCM. The combined organic layers were washed with water, dried over anhydrous NaSO<sub>4</sub> and filtered. The organic solvent was evaporated under the reduced pressure and the residue was purified by column chromatography on silica gel (eluent: petroleum ether/ethyl acetate = 5/1) to afford the desired product in quantitative yield (1.237 g) as a white solid.

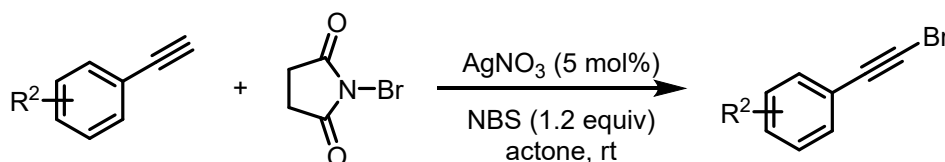

In an oven-dried flash (100 mL), to a solution of terminal alkynes (3.0 mmol) in acetone (10 mL) were added NBS (3.6 mmol) and AgNO<sub>3</sub> (0.15 mmol), the resulting mixture was stirred under N<sub>2</sub> at room temperature for 3 hours. After removing excess acetone, the reaction

was quenched with saturated  $\text{NH}_4\text{Cl}$  solution, and the organic layer was extracted with petroleum ether ( $10\text{ mL}\times 2$ ), dried over anhydrous  $\text{NaSO}_4$ , filtered and concentrated under reduced pressure to give bromoalkynes.

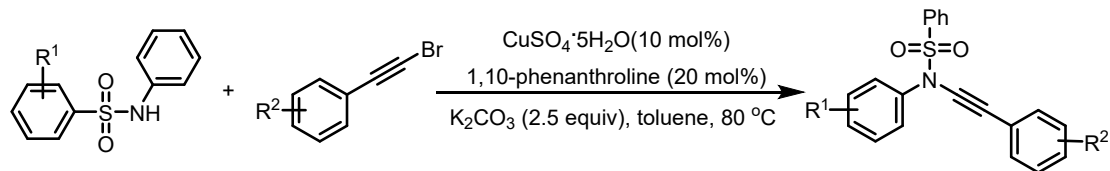

To a dried flask were added sulfonamides (12.0 mmol),  $\text{CuSO}_4\cdot 5\text{H}_2\text{O}$  (1.0 mmol), 1,10-phenanthroline (2.0 mmol) and  $\text{K}_2\text{CO}_3$  (25.0 mmol). The resulting mixture was subsequently treated with anhydrous toluene (50 mL) and bromoalkynes (10.0 mmol), and stirred at  $80\text{ }^\circ\text{C}$  overnight under  $\text{N}_2$ . When the reaction mixture was cooled to room temperature, to the reaction mixture was added  $\text{H}_2\text{O}$  (50 mL), with subsequent extraction with  $\text{CH}_2\text{Cl}_2$  ( $50\text{ mL}\times 3$ ). The organic layer was dried over  $\text{Na}_2\text{SO}_4$ . After the filtration and evaporation of the solvents under reduced pressure, the crude product was purified by column chromatography on silica gel using *n*-hexane as eluent.

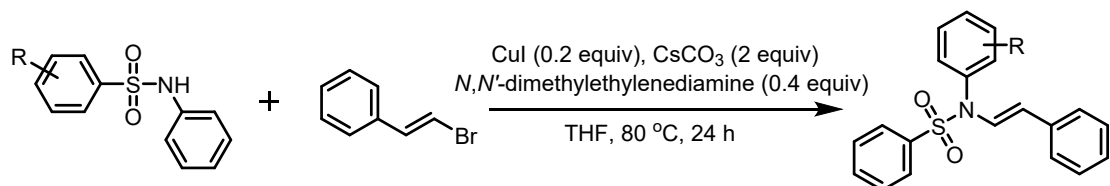

Copper iodide (1.0 mmol, 0.2 equiv), cesium carbonate (10.0 mmol, 2.0 equiv), and aniline analogs (5.0 mmol, 1.0 equiv) were first added sequentially to a 100 mL flask, and then displaced by three successive vacuum-argon cycles. The solvent THF (50 mL) was then added, followed by *N,N'*-dimethylethylenediamine (2.0 mmol, 0.4 equiv) and  $\beta$ -bromostyrene (11 mmol, 1.1 equiv). The mixture was then heated to reflux for 3 h at  $80\text{ }^\circ\text{C}$  (monitored by TLC). After cooling to room temperature, water (20 mL) was added to the reaction mixture, which was subsequently extracted with ethyl acetate ( $50\text{ mL}\times 3$ ), and the organic phase was dried over anhydrous sodium sulfate, filtered, and concentrated. The resulting crude product was separated by silica gel column chromatography using *n*-hexane/ EtOAc (25:1) as eluent to finally obtain the target compound.

## 2.2 General Procedure for the synthesis of product 3 and product 5

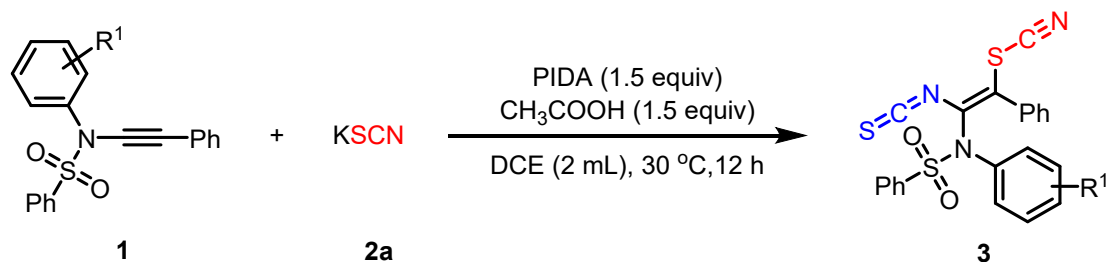

A 20 mL vial was charged with substrate **1** (0.1 mmol, 1.0 equiv), **2a** (2.0 equiv), PIDA (1.5 equiv), CH<sub>3</sub>COOH (1.5 equiv), 1,1-Dichloroethane (DCE, 2 mL) and a magnetic stir bar. The reaction mixture was reacted at 30 °C for 12 hours. After completing reaction, it was monitored with TLC. Then the reaction mixture was diluted with EtOAc (10 mL) and filtered through a pad of silica gel. The vial and silica gel were washed with an additional of EtOAc (20 mL). The filtrate was concentrated *in vacuo*, and the resulting residue was purified by flash column chromatography using EtOAc /*n*-hexane as the eluent to afford the product.

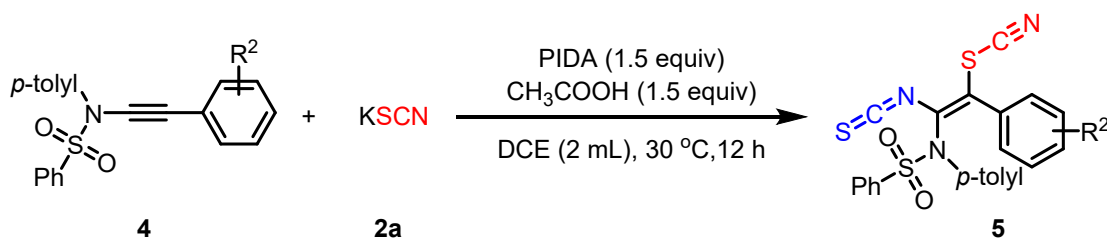

A 20 mL vial was charged with substrate **1b** (0.1 mmol, 1.0 equiv), **2a** (2.0 equiv), PIDA (1.5 equiv), CH<sub>3</sub>COOH (1.5 equiv), 1,1-Dichloroethane (DCE, 2 mL) and a magnetic stir bar. The reaction mixture was reacted at 30 °C for 12 hours. After completing reaction, it was monitored with TLC. Then the reaction mixture was diluted with EtOAc (10 mL) and filtered through a pad of silica gel. The vial and silica gel were washed with an additional of EtOAc (20 mL). The filtrate was concentrated *in vacuo*, and the resulting residue was purified by flash column chromatography using EtOAc/*n*-hexane as the eluent to afford the product.

### 2.3 Gram-scale synthesis of 3a

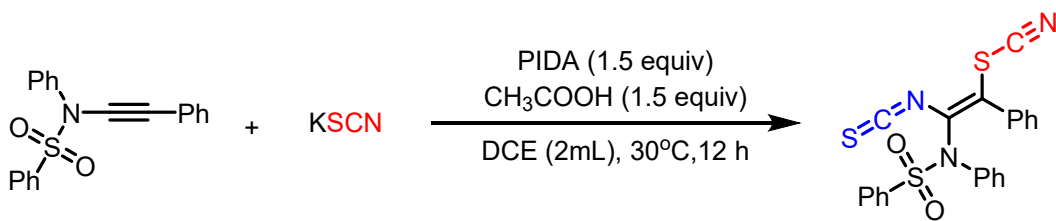

**1a** (3 mmol, 1 g)

**2a** (2.0 equiv)

**3a** (0.81g 60%)

In an oven-dried undivided three-necked bottle (250 mL) equipped with a stir bar, *N*-(phenylethynyl)-*N*-(*p*-tolyl) benzenesulfonamide **1a** (3 mmol, 1.005g), potassium thiocyanate **2a** (6 mmol), PIDA (4.5 mmol), acetic acid (4.5 mmol) and DCE (60 mL) were combined and added. The reaction mixture was reacted at 30 °C for 12 hours. When the reaction was finished, the reaction mixture was washed with water and extracted with CH<sub>2</sub>Cl<sub>2</sub> (100 mL x 3). The organic layers were combined, dried over Na<sub>2</sub>SO<sub>4</sub>, and concentrated. The crude product was purified by column chromatography on silica gel using EtOAc/*n*-hexane (1:20) as eluent to afford the product **3a** in 60% yield.

## 2.4 General Procedure for the synthesis of product 7

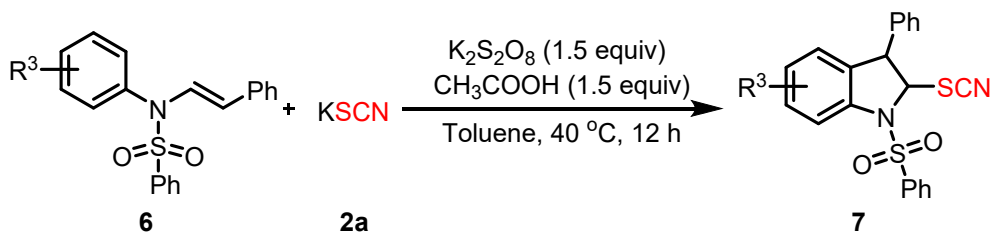

A 15 mL tube was charged with substrate **6** (0.1 mmol, 1.0 equiv), **2a** (2.0 equiv), K<sub>2</sub>S<sub>2</sub>O<sub>8</sub> (1.5 equiv), CH<sub>3</sub>COOH (1.5 equiv), Toluene (2 mL). The reaction mixture was reacted at 40 °C for 12 hours. After completing reaction, it was monitored with TLC. Then the reaction mixture was diluted with EtOAc (5 mL) and filtered through a pad of silica gel. The vial and silica gel were washed with an additional of EtOAc (5 mL). The filtrate was concentrated *in vacuo*, and the resulting residue was purified by flash column chromatography using EtOAc/*n*-hexane as the eluent to afford the product.

## 2.5 Characterization data

Table S1. Crystal data and structure refinement for **3d**.

|                     |                                                                              |
|---------------------|------------------------------------------------------------------------------|
| Identification code | 2104011479_0m                                                                |
| Empirical formula   | C <sub>26</sub> H <sub>23</sub> N <sub>3</sub> O <sub>2</sub> S <sub>3</sub> |
| Formula weight      | 505.65                                                                       |

|                                   |                                             |                    |
|-----------------------------------|---------------------------------------------|--------------------|
| Temperature                       | 173.0 K                                     |                    |
| Wavelength                        | 1.34139 Å                                   |                    |
| Crystal system                    | Monoclinic                                  |                    |
| Space group                       | C 1 2/c 1                                   |                    |
| Unit cell dimensions              | a = 20.0220(3) Å                            | a = 90°.           |
|                                   | b = 11.6268(2) Å                            | b = 107.0630(10)°. |
|                                   | c = 22.3898(3) Å                            | g = 90°.           |
| Volume                            | 4982.74(13) Å <sup>3</sup>                  |                    |
| Z                                 | 8                                           |                    |
| Density (calculated)              | 1.348 Mg/m <sup>3</sup>                     |                    |
| Absorption coefficient            | 1.920 mm <sup>-1</sup>                      |                    |
| F(000)                            | 2112                                        |                    |
| Crystal size                      | 0.07 x 0.06 x 0.05 mm <sup>3</sup>          |                    |
| Theta range for data collection   | 3.870 to 54.954°.                           |                    |
| Index ranges                      | -24<=h<=24, -12<=k<=14, -27<=l<=26          |                    |
| Reflections collected             | 20255                                       |                    |
| Independent reflections           | 4675 [R(int) = 0.0314]                      |                    |
| Completeness to theta = 53.594°   | 98.4 %                                      |                    |
| Absorption correction             | Semi-empirical from equivalents             |                    |
| Max. and min. transmission        | 0.7508 and 0.6144                           |                    |
| Refinement method                 | Full-matrix least-squares on F <sup>2</sup> |                    |
| Data / restraints / parameters    | 4675 / 0 / 310                              |                    |
| Goodness-of-fit on F <sup>2</sup> | 1.031                                       |                    |
| Final R indices [I>2sigma(I)]     | R1 = 0.0334, wR2 = 0.0809                   |                    |
| R indices (all data)              | R1 = 0.0386, wR2 = 0.0845                   |                    |
| Extinction coefficient            | n/a                                         |                    |
| Largest diff. peak and hole       | 0.475 and -0.396 e.Å <sup>-3</sup>          |                    |

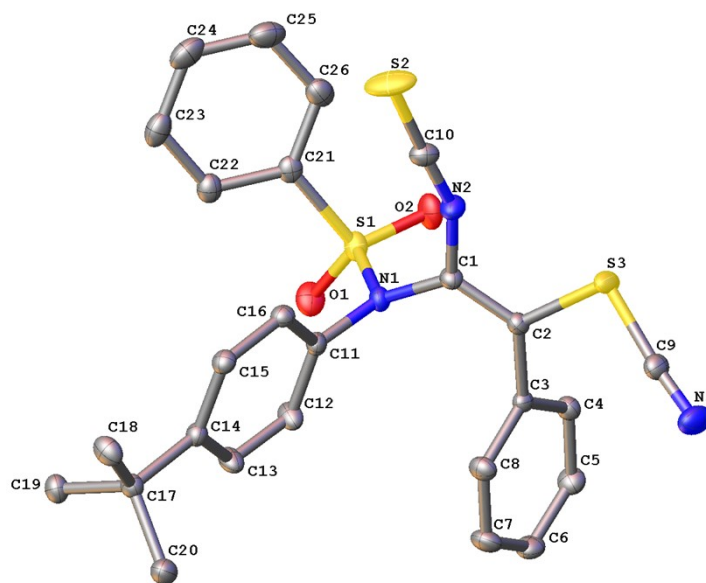

Figure 2-1 X-ray structure of **3d**

## 2.6 optimization of solvents

Table S2 Optimization of the reaction conditions<sup>a</sup>

| Entry | Variation from standard conditions            | Yield (% <b>3a</b> ) <sup>b</sup> |
|-------|-----------------------------------------------|-----------------------------------|
| 1     | DCM instead of DCE                            | trace                             |
| 2     | EtOAc instead of DCE                          | 9                                 |
| 3     | acetone instead of DCE                        | trace                             |
| 4     | H <sub>2</sub> O <sub>2</sub> instead of PIDA | 14                                |
| 5     | O <sub>2</sub> instead of PIDA                | 0                                 |

<sup>a</sup>Reaction conditions: **1a** (0.1 mmol, 1 equiv), **2a** (0.2 mmol), oxidant (0.15 mmol) and additive (0.15 mmol) in solvent (2 mL) at 30 °C for 12 h. <sup>b</sup>Isolated yield. <sup>c</sup>Measured by <sup>1</sup>H NMR of the crude products. NR = no reaction.

### (*E*)-*N*-(1-isothiocyanato-2-phenyl-2-thiocyanatovinyl)-*N*-phenylbenzenesulfonamide (**3a**)

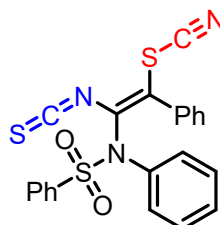

<sup>1</sup>H NMR (400 MHz, CDCl<sub>3</sub>) δ 7.61 – 7.57 (m, 1H), 7.56 – 7.52 (m, 2H), 7.48 – 7.41 (m, 5H), 7.38 (dd, *J* = 8.1, 1.6 Hz, 2H), 7.28 (t, *J* = 1.2 Hz, 0.5H), 7.24

(t,  $J = 1.2$  Hz, 0.5H), 7.19 – 7.14 (m, 2H), 6.68 – 6.63 (m, 2H).  $^{13}\text{C}$  NMR (100 MHz,  $\text{CDCl}_3$ )  $\delta$  140.56, 138.07, 137.74, 133.74, 131.87, 130.45, 129.65, 129.33, 129.15, 128.89, 128.79, 128.18, 127.99, 127.77, 124.73, 107.31. HRMS (ESI-TOF)  $m/z$  Calcd for  $\text{C}_{22}\text{H}_{15}\text{N}_3\text{O}_2\text{S}_3$   $[\text{M}+\text{H}]^+$ : 450.0405, found: 450.0412.

**(*E*)-*N*-(1-isothiocyanato-2-phenyl-2-thiocyanatovinyl)-*N*-(*p*-tolyl) benzenesulfonamide (3b)**

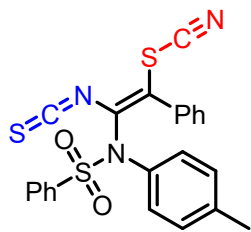

$^1\text{H}$  NMR (400 MHz,  $\text{CDCl}_3$ )  $\delta$  7.61 – 7.57 (m, 1H), 7.55 – 7.52 (m, 2H), 7.48 – 7.40 (m, 7H), 6.96 (d,  $J = 8.2$  Hz, 2H), 6.51 (d,  $J = 8.4$  Hz, 2H), 2.29 (s, 3H).  $^{13}\text{C}$  NMR (100 MHz,  $\text{CDCl}_3$ )  $\delta$  140.45, 139.26, 137.75, 135.29,

133.68, 131.91, 130.44, 129.97, 129.72, 129.13, 128.77, 128.23, 127.84, 127.78, 124.74, 107.42, 21.16. HRMS (ESI-TOF)  $m/z$  Calcd for  $\text{C}_{23}\text{H}_{17}\text{N}_3\text{O}_2\text{S}_3$   $[\text{M}+\text{H}]^+$ : 464.0561, found: 464.0540.

**(*E*)-*N*-(4-ethylphenyl)-*N*-(1-isothiocyanato-2-phenyl-2-thiocyanatovinyl) benzenesulfonamide (3c)**

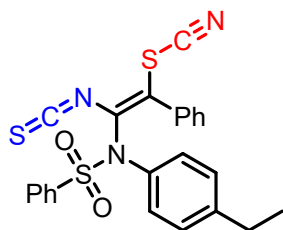

$^1\text{H}$  NMR (400 MHz,  $\text{CDCl}_3$ )  $\delta$  7.59 (td,  $J = 7.2, 1.3$  Hz, 1H), 7.56 – 7.52 (m, 2H), 7.48 – 7.39 (m, 7H), 6.99 (d,  $J = 8.4$  Hz, 2H), 6.54 (d,  $J = 8.4$  Hz, 2H), 2.59 (q,  $J = 7.6$  Hz, 2H), 1.19 (t,  $J = 7.6$  Hz, 3H).  $^{13}\text{C}$  NMR (100 MHz,  $\text{CDCl}_3$ )  $\delta$  145.44, 140.48, 137.83, 135.43, 133.66, 131.93,

130.41, 129.73, 129.12, 128.74, 128.73, 128.24, 127.95, 127.77, 124.74, 107.40, 28.39, 15.17. HRMS (ESI-TOF)  $m/z$  Calcd for  $\text{C}_{24}\text{H}_{19}\text{N}_3\text{O}_2\text{S}_3$   $[\text{M}+\text{H}]^+$ : 478.0718, found: 478.0705.

**(*E*)-*N*-(4-(*tert*-butyl)phenyl)-*N*-(1-isothiocyanato-2-phenyl-2-thiocyanatovinyl)benzenesulfonamide (3d)**

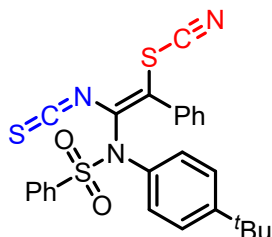

$^1\text{H}$  NMR (400 MHz,  $\text{CDCl}_3$ )  $\delta$  7.61 – 7.57 (m, 1H), 7.55 (d,  $J = 8.0$  Hz, 2H), 7.44 (dt,  $J = 13.9, 6.8$  Hz, 7H), 7.18 (d,  $J = 8.9$  Hz, 2H), 6.57 (d,  $J = 8.6$  Hz, 2H), 1.26 (s, 9H).  $^{13}\text{C}$  NMR (100 MHz,  $\text{CDCl}_3$ )  $\delta$  152.34, 140.50, 137.85, 135.12, 133.63, 131.86, 130.37, 129.70, 129.11, 128.69,

128.20, 127.73, 127.59, 126.26, 124.57, 107.41, 34.67, 31.16. HRMS (ESI-TOF)  $m/z$  Calcd for  $\text{C}_{26}\text{H}_{23}\text{N}_3\text{O}_2\text{S}_3$   $[\text{M}+\text{H}]^+$ : 506.1031, found: 506.1022.



**(E)-N-(1-isothiocyanato-2-phenyl-2-thiocyanatovinyl)-N-(4-methoxyphenyl)**

**benzenesulfonamide (3e)**

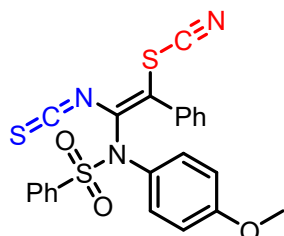

$^1\text{H}$  NMR (400 MHz,  $\text{CDCl}_3$ )  $\delta$  7.61 – 7.57 (m, 1H), 7.55 – 7.52 (m, 2H), 7.49 – 7.42 (m, 7H), 6.68 – 6.63 (m, 2H), 6.53 – 6.49 (m, 2H), 3.75 (s, 3H).  $^{13}\text{C}$  NMR (100 MHz,  $\text{CDCl}_3$ )  $\delta$  159.88, 140.47, 137.67, 133.67, 131.98, 130.44, 130.29, 129.76, 129.66, 129.11, 128.79, 128.27, 127.50, 124.93, 114.41, 107.40, 55.45. HRMS (ESI-TOF)  $m/z$  Calcd for  $\text{C}_{23}\text{H}_{17}\text{N}_3\text{O}_3\text{S}_3$   $[\text{M}+\text{H}]^+$ : 480.0510, found: 480.0503.

**(E)-N-(4-fluorophenyl)-N-(1-isothiocyanato-2-phenyl-2-thiocyanatovinyl)benzenesulfonamide (3f)**

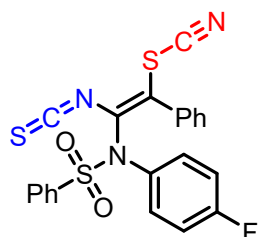

$^1\text{H}$  NMR (400 MHz,  $\text{CDCl}_3$ )  $\delta$  7.63 – 7.59 (m, 1H), 7.55 – 7.52 (m, 2H), 7.49 – 7.43 (m, 5H), 7.41 – 7.37 (m, 2H), 6.88 – 6.82 (m, 2H), 6.61 – 6.55 (m, 2H).  $^{13}\text{C}$  NMR (100 MHz,  $\text{CDCl}_3$ )  $\delta$  162.43 (d,  $J=251.49$  Hz), 140.70, 137.47, 133.92, 133.82 (d,  $J= 3.03$  Hz), 131.84, 130.58, 130.9 (d,  $J= 9.09$  Hz), 129.64, 129.26, 128.90, 128.19, 128.07, 124.66, 116.33 (d,  $J= 22.22$  Hz), 107.23.  $^{19}\text{F}$  NMR (376 MHz,  $\text{CDCl}_3$ )  $\delta$  -110.58 (s, 1F). HRMS (ESI-TOF)  $m/z$  Calcd for  $\text{C}_{22}\text{H}_{14}\text{FN}_3\text{O}_2\text{S}_3$   $[\text{M}+\text{H}]^+$ : 468.0310, found: 468.0301.

**(E)-N-(4-chlorophenyl)-N-(1-isothiocyanato-2-phenyl-2-thiocyanatovinyl)benzenesulfonamide (3g)**

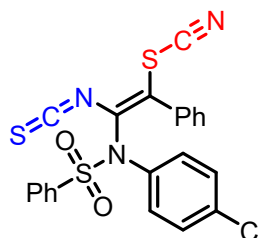

$^1\text{H}$  NMR (400 MHz,  $\text{CDCl}_3$ )  $\delta$  7.61 (t,  $J = 7.4$  Hz, 1H), 7.56 (d,  $J = 8.3$  Hz, 2H), 7.46 (dt,  $J = 6.3, 3.4$  Hz, 5H), 7.37 (dd,  $J = 7.7, 1.9$  Hz, 2H), 7.14 (d,  $J = 8.7$  Hz, 2H), 6.57 (d,  $J = 8.7$  Hz, 2H).  $^{13}\text{C}$  NMR (100 MHz,  $\text{CDCl}_3$ )  $\delta$  140.76, 137.49, 136.49, 134.94, 133.93, 131.74, 130.57, 129.56, 129.53, 129.28, 128.98, 128.88, 128.27, 128.12, 124.48, 107.13. HRMS (ESI-TOF)  $m/z$  Calcd for  $\text{C}_{22}\text{H}_{14}\text{ClN}_3\text{O}_2\text{S}_3$   $[\text{M}+\text{H}]^+$ : 484.0015, found: 484.0024.

**(E)-N-(4-bromophenyl)-N-(1-isothiocyanato-2-phenyl-2-**

**thiocyanatovinyl)benzenesulfonamide (3h)**

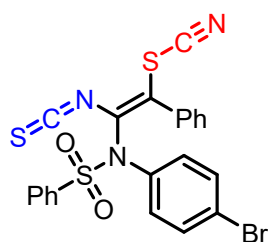

$^1\text{H}$  NMR (400 MHz,  $\text{CDCl}_3$ )  $\delta$  7.63 – 7.59 (m, 1H), 7.57 – 7.54 (m, 2H), 7.48 – 7.43 (m, 5H), 7.37 (dd,  $J = 7.9, 1.7$  Hz, 2H), 7.31 – 7.27 (m, 2H), 6.54 – 6.49 (m, 2H).  $^{13}\text{C}$  NMR (100 MHz,  $\text{CDCl}_3$ )  $\delta$  140.79, 137.50, 137.06, 133.94, 132.54, 131.74, 130.57, 129.55, 129.29, 129.19, 128.88, 128.31, 128.11, 124.43, 123.03, 107.11. HRMS (ESI-TOF)  $m/z$  Calcd for  $\text{C}_{22}\text{H}_{14}\text{BrN}_3\text{O}_2\text{S}_3$   $[\text{M}+\text{H}]^+$ : 527.9510, found: 527.9499.

**methyl(*E*)-4-(*N*-(1-isothiocyanato-2-phenyl-2-thiocyanatovinyl)phenylsulfonamido)benzoate (3i)**

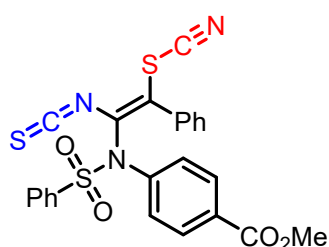

$^1\text{H}$  NMR (400 MHz,  $\text{CDCl}_3$ )  $\delta$  7.88 – 7.78 (m, 2H), 7.65 – 7.54 (m, 3H), 7.42 (dt,  $J = 9.5, 7.1$  Hz, 5H), 7.31 (d,  $J = 6.6$  Hz, 2H), 6.80 (d,  $J = 8.7$  Hz, 2H), 3.89 (s, 3H).  $^{13}\text{C}$  NMR (100 MHz,  $\text{CDCl}_3$ )  $\delta$  165.89, 142.20, 137.56, 134.00, 131.62, 130.65, 130.54, 129.75, 129.40, 129.30, 128.86, 127.99, 126.21, 124.38, 107.06, 52.39. HRMS (ESI-TOF)  $m/z$  Calcd for  $\text{C}_{24}\text{H}_{17}\text{N}_3\text{O}_4\text{S}_3$   $[\text{M}+\text{H}]^+$ : 508.0459, found: 508.0449.

**(*E*)-*N*-(1-isothiocyanato-2-phenyl-2-thiocyanatovinyl)-*N*-(*o*-tolyl) benzenesulfonamide (3j)**

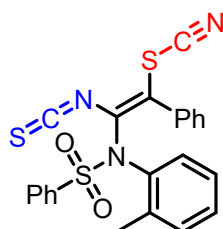

$^1\text{H}$  NMR (400 MHz,  $\text{CDCl}_3$ )  $\delta$  7.65 – 7.59 (m, 3H), 7.49 – 7.38 (m, 5H), 7.33 – 7.29 (m, 2H), 7.11 (td,  $J = 7.5, 1.3$  Hz, 1H), 7.03 (d,  $J = 7.9$  Hz, 1H), 6.80 (td,  $J = 7.7, 1.8$  Hz, 1H), 6.36 (dd,  $J = 8.1, 1.3$  Hz, 1H), 1.56 (s, 3H).  $^{13}\text{C}$  NMR (100 MHz,  $\text{CDCl}_3$ )  $\delta$  138.76, 137.81, 137.44, 136.74, 133.86, 132.15, 131.70, 130.52, 130.12, 129.92, 129.35, 129.14, 129.02, 128.28, 126.92, 126.11, 125.44, 107.49, 17.99. HRMS (ESI-TOF)  $m/z$  Calcd for  $\text{C}_{24}\text{H}_{17}\text{N}_3\text{O}_4\text{S}_3$   $[\text{M}+\text{H}]^+$ : 464.0561, found: 464.0557.

**(*E*)-*N*-(1-isothiocyanato-2-phenyl-2-thiocyanatovinyl)-*N*-(*m*-tolyl) benzenesulfonamide (3k)**

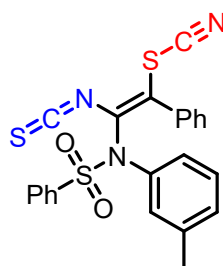

$^1\text{H}$  NMR (400 MHz,  $\text{CDCl}_3$ )  $\delta$  7.62 – 7.55 (m, 3H), 7.48 – 7.42 (m, 5H), 7.37 (dd,  $J = 7.8, 1.9$  Hz, 2H), 7.05 (d,  $J = 6.7$  Hz, 2H), 6.46 – 6.35 (m, 2H), 2.16 (s, 3H).  $^{13}\text{C}$  NMR (100 MHz,  $\text{CDCl}_3$ )  $\delta$  140.59, 139.40, 137.85, 138.84, 133.66, 131.92, 130.36, 129.69, 129.64, 129.07, 128.96, 128.80, 128.71,

128.20, 127.63, 124.83, 124.61, 107.34, 21.18. HRMS (ESI-TOF)  $m/z$  Calcd for  $C_{24}H_{17}N_3O_4S_3$   $[M+H]^+$ : 464.0561, found: 464.0569.

**(E)-N-(3-chlorophenyl)-N-(1-isothiocyanato-2-phenyl-2-thiocyanatovinyl)**

**benzenesulfonamide (3l)**

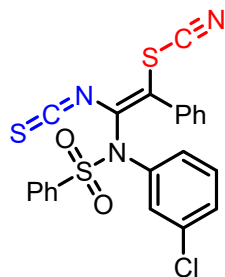

$^1H$  NMR (400 MHz,  $CDCl_3$ )  $\delta$  7.62 (t,  $J = 7.4$  Hz, 1H), 7.58 (d,  $J = 7.5$  Hz, 2H), 7.47 (dq,  $J = 8.0, 3.4$  Hz, 5H), 7.34 (d,  $J = 6.1$  Hz, 2H), 7.24 (d,  $J = 7.1$  Hz, 1H), 7.11 (t,  $J = 8.4$  Hz, 1H), 6.60 – 6.56 (m, 2H).  $^{13}C$  NMR (100 MHz,  $CDCl_3$ )  $\delta$  141.04, 139.06, 137.55, 134.72, 134.02, 131.66, 130.65, 130.15, 129.51, 129.32, 129.03, 128.90, 128.36, 128.12, 128.03, 125.51, 124.38, 107.13. HRMS (ESI-TOF)  $m/z$  Calcd for  $C_{22}H_{14}ClN_3O_2S_3$   $[M+H]^+$ : 484.0015, found: 484.0009.

**(E)-N-(1-isothiocyanato-2-thiocyanato-2-(p-tolyl) vinyl)-N-(p-tolyl) benzenesulfonamide (5a)**

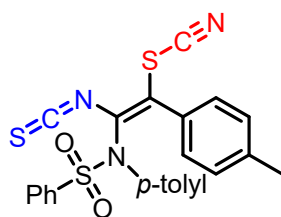

$^1H$  NMR (400 MHz,  $CDCl_3$ )  $\delta$  7.61 – 7.53 (m, 3H), 7.43 (t,  $J = 7.8$  Hz, 2H), 7.31 (d,  $J = 8.1$  Hz, 2H), 7.26 (d,  $J = 3.0$  Hz, 2H), 6.97 (d,  $J = 8.1$  Hz, 2H), 6.54 (d,  $J = 8.3$  Hz, 2H), 2.43 (s, 3H), 2.29 (s, 3H).  $^{13}C$  NMR (100 MHz,  $CDCl_3$ )  $\delta$  140.74, 140.23, 139.22, 137.85, 135.35, 133.61, 129.96, 129.61, 129.45, 129.10, 128.91, 128.41, 128.24, 127.89, 124.11, 107.55, 21.59, 21.14. HRMS (ESI-TOF)  $m/z$  Calcd for  $C_{24}H_{19}N_3O_2S_3$   $[M+H]^+$ : 478.0718, found: 478.0713.

**(E)-N-(1-isothiocyanato-2-(4-methoxyphenyl)-2-thiocyanatovinyl)-N-(p-tolyl)**

**benzenesulfonamide (5b)**

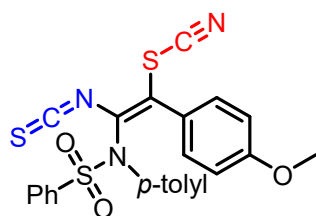

$^1H$  NMR (400 MHz,  $CDCl_3$ )  $\delta$  7.62 – 7.55 (m, 3H), 7.47 – 7.42 (m, 2H), 7.40 – 7.35 (m, 2H), 7.00 – 6.95 (m, 4H), 6.57 – 6.52 (m, 2H), 3.88 (s, 3H), 2.29 (s, 3H).  $^{13}C$  NMR (100 MHz,  $CDCl_3$ )  $\delta$  161.15, 140.12, 139.21, 137.86, 135.39, 133.63, 131.33, 129.98, 129.13, 128.29, 128.23, 127.82, 123.92, 123.89, 114.18, 107.65, 55.42, 21.14. HRMS (ESI-TOF)  $m/z$  Calcd for  $C_{24}H_{19}N_3O_3S_3$   $[M+H]^+$ : 494.0667, found: 494.0655.

**(E)-N-(2-(4-ethylphenyl)-1-isothiocyanato-2-thiocyanatovinyl)-N-(p-tolyl)**

**benzenesulfonamide (5c)**

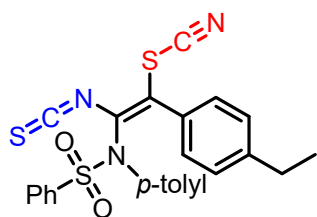

$^1\text{H}$  NMR (400 MHz,  $\text{CDCl}_3$ )  $\delta$  7.58 (t,  $J = 7.4$  Hz, 1H), 7.56 – 7.48 (m, 2H), 7.45 – 7.38 (m, 2H), 7.37 – 7.26 (m, 4H), 6.96 (d,  $J = 8.2$  Hz, 2H), 6.62 – 6.45 (m, 2H), 2.73 (q,  $J = 7.6$  Hz, 2H), 2.29 (s, 3H), 1.30 (t,  $J = 7.6$  Hz, 3H).  $^{13}\text{C}$  NMR (100 MHz,  $\text{CDCl}_3$ )  $\delta$  146.97, 140.22, 139.16, 137.86, 135.33, 133.59, 130.45, 129.90, 129.68, 129.13, 129.07, 128.21, 128.14, 127.86, 124.32, 107.54, 28.80, 21.12, 15.31. HRMS (ESI-TOF)  $m/z$  Calcd for  $\text{C}_{25}\text{H}_{21}\text{N}_3\text{O}_2\text{S}_3$   $[\text{M}+\text{H}]^+$ : 492.0874, found: 492.0866.

**(E)-N-(2-(4-(tert-butyl)phenyl)-1-isothiocyanato-2-thiocyanatovinyl)-N-(p-tolyl) benzenesulfonamide (5d)**

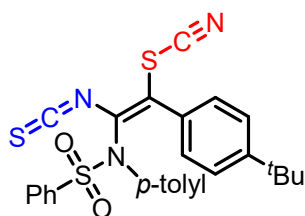

$^1\text{H}$  NMR (400 MHz,  $\text{CDCl}_3$ )  $\delta$  7.58 (t,  $J = 7.4$  Hz, 1H), 7.55 – 7.52 (m, 2H), 7.46 – 7.40 (m, 4H), 7.35 – 7.31 (m, 2H), 6.93 (d,  $J = 8.3$  Hz, 2H), 6.51 – 6.47 (m, 2H), 2.28 (s, 3H), 1.37 (s, 9H).  $^{13}\text{C}$  NMR (100 MHz,  $\text{CDCl}_3$ )  $\delta$  153.90, 140.26, 139.12, 137.90, 135.34, 133.60, 129.84, 129.44, 129.08, 128.97, 128.21, 127.85, 127.66, 125.63, 124.71, 107.59, 34.97, 31.26, 21.13. HRMS (ESI-TOF)  $m/z$  Calcd for  $\text{C}_{27}\text{H}_{25}\text{N}_3\text{O}_2\text{S}_3$   $[\text{M}+\text{H}]^+$ : 520.1187, found: 520.1168.

**(E)-N-(2-(4-fluorophenyl)-1-isothiocyanato-2-thiocyanatovinyl)-N-(p-tolyl) benzenesulfonamide (5e)**

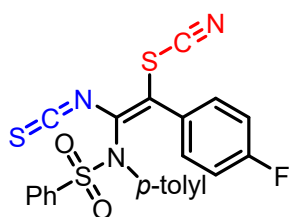

$^1\text{H}$  NMR (400 MHz,  $\text{CDCl}_3$ )  $\delta$  7.60 (t,  $J = 7.4$  Hz, 1H), 7.56 (d,  $J = 7.1$  Hz, 2H), 7.48 – 7.39 (m, 4H), 7.15 (t,  $J = 8.6$  Hz, 2H), 6.99 (d,  $J = 8.2$  Hz, 2H), 6.53 (d,  $J = 8.3$  Hz, 2H), 2.30 (s, 3H).  $^{13}\text{C}$  NMR (100 MHz,  $\text{CDCl}_3$ )  $\delta$  163.70 (d,  $J = 252.50$  Hz), 140.61, 139.35, 137.69, 135.29, 133.76, 131.94 (d,  $J = 8.08$  Hz), 130.06, 129.17, 128.20, 127.92 (d,  $J = 2.02$  Hz), 127.62, 126.69, 125.21, 116.09 (d,  $J = 23.23$  Hz), 107.27, 21.13.  $^{19}\text{F}$  NMR (376 MHz,  $\text{CDCl}_3$ )  $\delta$  -108.78 (s, 1F). HRMS (ESI-TOF)  $m/z$  Calcd for  $\text{C}_{23}\text{H}_{16}\text{FN}_3\text{O}_2\text{S}_3$   $[\text{M}+\text{H}]^+$ : 482.0467, fund: 482.0474.

**(E)-N-(2-(4-chlorophenyl)-1-isothiocyanato-2-thiocyanatovinyl)-N-(p-tolyl) benzenesulfonamide (5f)**

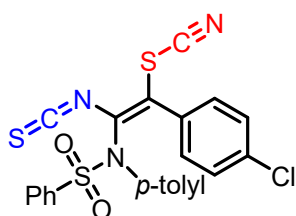

$^1\text{H}$  NMR (400 MHz,  $\text{CDCl}_3$ )  $\delta$  7.61 (t,  $J = 7.4$  Hz, 1H), 7.55 (d,  $J = 7.1$

Hz, 2H), 7.47 – 7.42 (m, 4H), 7.36 (d,  $J = 8.5$  Hz, 2H), 7.00 (d,  $J = 8.1$  Hz, 2H), 6.55 (d,  $J = 8.3$  Hz, 2H), 2.30 (s, 3H).  $^{13}\text{C}$  NMR (100 MHz,  $\text{CDCl}_3$ )  $\delta$  140.66, 139.41, 137.63, 136.65, 135.25, 133.79, 131.12, 130.40, 130.11, 129.18, 129.16, 128.20, 127.62, 126.39, 125.44, 107.20, 21.14. HRMS (ESI-TOF)  $m/z$  Calcd for  $\text{C}_{23}\text{H}_{16}\text{ClN}_3\text{O}_2\text{S}_3$   $[\text{M}+\text{H}]^+$ : 498.0171, found: 498.0169.

**(*E*)-*N*-(2-(4-bromophenyl)-1-isothiocyanato-2-thiocyanatovinyl)-*N*-(*p*-tolyl)benzenesulfonamide (5g)**

**benzenesulfonamide (5g)**

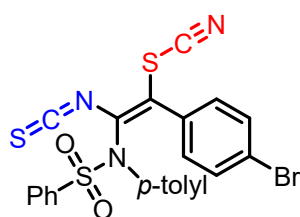

$^1\text{H}$  NMR (400 MHz,  $\text{CDCl}_3$ )  $\delta$  7.63 – 7.58 (m, 3H), 7.56 – 7.52 (m, 2H), 7.48 – 7.42 (m, 2H), 7.31 – 7.27 (m, 2H), 7.00 (d,  $J = 8.3$  Hz, 2H), 6.58 – 6.53 (m, 2H), 2.30 (s, 3H).  $^{13}\text{C}$  NMR (100 MHz,  $\text{CDCl}_3$ )  $\delta$  140.67, 139.42, 137.62, 135.23, 133.79, 132.11, 131.30, 130.91,

130.12, 129.18, 128.20, 127.62, 126.38, 125.43, 125.00, 107.19, 21.14. HRMS (ESI-TOF)  $m/z$  Calcd for  $\text{C}_{23}\text{H}_{16}\text{BrN}_3\text{O}_2\text{S}_3$   $[\text{M}+\text{H}]^+$ : 541.9666, found: 541.9659.

**(*E*)-*N*-(2-(4-cyanophenyl)-1-isothiocyanato-2-thiocyanatovinyl)-*N*-(*p*-tolyl)benzenesulfonamide (5h)**

**benzenesulfonamide (5h)**

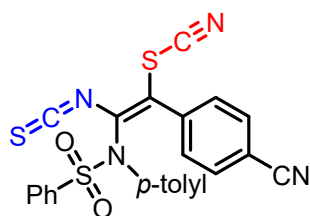

$^1\text{H}$  NMR (400 MHz,  $\text{CDCl}_3$ )  $\delta$  8.31 (d,  $J = 8.9$  Hz, 2H), 7.64 – 7.58 (m, 1H), 7.58 – 7.55 (m, 2H), 7.51 – 7.40 (m, 4H), 6.94 (d,  $J = 8.1$  Hz, 2H), 6.57 (d,  $J = 8.4$  Hz, 2H), 2.28 (s, 3H).  $^{13}\text{C}$  NMR (100 MHz,  $\text{CDCl}_3$ )  $\delta$  148.86, 145.42, 139.49, 138.96, 136.74, 134.96, 134.23, 130.29,

130.15, 129.12, 128.26, 126.95, 126.28, 124.15, 106.89, 105.87, 21.05. HRMS (ESI-TOF)  $m/z$  Calcd for  $\text{C}_{24}\text{H}_{16}\text{N}_4\text{O}_2\text{S}_3$   $[\text{M}+\text{H}]^+$ : 489.0514, found: 489.0511.

**methyl(*E*)-4-(2-isothiocyanato-1-thiocyanato-2-(*N*-(*p*-tolyl)phenylsulfonamido)vinyl)benzoate (5i)**

**phenylsulfonamido)vinyl)benzoate (5i)**

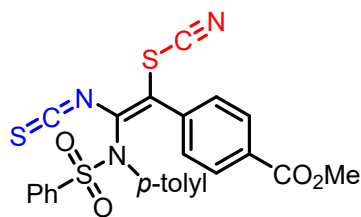

$^1\text{H}$  NMR (400 MHz,  $\text{CDCl}_3$ )  $\delta$  8.13 (dd,  $J = 8.6, 2.0$  Hz, 2H), 7.60 (t,  $J = 7.4$  Hz, 1H), 7.55 (d,  $J = 7.1$  Hz, 2H), 7.50 (d,  $J = 8.5$  Hz, 2H), 7.47 – 7.41 (m, 2H), 6.97 (d,  $J = 8.0$  Hz, 2H), 6.52 (d,  $J = 8.4$  Hz, 2H), 3.97 (s, 3H), 2.29 (s, 3H).  $^{13}\text{C}$  NMR (100 MHz,  $\text{CDCl}_3$ )  $\delta$  166.26, 140.78, 139.41, 137.57, 136.42, 135.25, 133.80, 131.66, 130.10, 129.96, 129.88,

129.17, 128.21, 127.56, 126.21, 125.94, 107.04, 52.45, 21.13. HRMS (ESI-TOF)  $m/z$  Calcd for

C<sub>25</sub>H<sub>19</sub>N<sub>3</sub>O<sub>4</sub>S<sub>3</sub> [M+H]<sup>+</sup>: 522.0616, found: 522.0609.

**(E)-N-(1-isothiocyanato-2-thiocyanato-2-(*m*-tolyl)vinyl)-N-(*p*-tolyl)benzenesulfonamide (5j)**

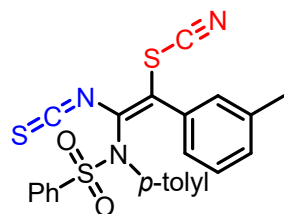

<sup>1</sup>H NMR (400 MHz, CDCl<sub>3</sub>) δ 7.60 – 7.53 (m, 3H), 7.45 – 7.40 (m, 2H), 7.33 (t, *J* = 7.8 Hz, 1H), 7.28 (s, 1H), 7.20 – 7.17 (m, 2H), 6.97 (d, *J* = 8.6 Hz, 2H), 6.54 – 6.50 (m, 2H), 2.38 (s, 3H), 2.29 (s, 3H). <sup>13</sup>C NMR (100 MHz, CDCl<sub>3</sub>) δ 140.41, 139.18, 138.48, 137.85, 135.42, 133.61,

131.75, 131.15, 130.20, 129.89, 129.07, 128.62, 128.21, 128.01, 127.88, 126.73, 124.52, 107.47, 21.37, 21.13. HRMS (ESI-TOF) *m/z* Calcd for C<sub>24</sub>H<sub>19</sub>N<sub>3</sub>O<sub>2</sub>S<sub>3</sub> [M+H]<sup>+</sup>: 478.0718, found: 478.0722.

**(E)-N-(2-(3-fluorophenyl)-1-isothiocyanato-2-thiocyanatovinyl)-N-(*p*-tolyl)benzenesulfonamide (5k)**

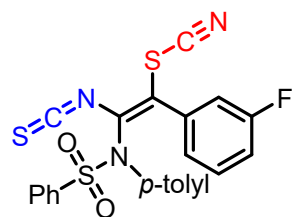

<sup>1</sup>H NMR (400 MHz, CDCl<sub>3</sub>) δ 7.62 – 7.58 (m, 1H), 7.57 – 7.50 (m, 2H), 7.44 (ddt, *J* = 9.9, 4.5, 3.0 Hz, 3H), 7.24 (ddd, *J* = 7.7, 1.7, 1.0 Hz, 1H), 7.17 (tdd, *J* = 8.5, 2.6, 1.0 Hz, 1H), 7.11 – 7.05 (m, 1H), 6.99 (d, *J* = 8.7 Hz, 2H), 6.60 – 6.51 (m, 2H), 2.30 (s, 3H). <sup>13</sup>C NMR (100 MHz,

CDCl<sub>3</sub>) δ 162.41 (d, *J* = 249.47 Hz), 140.85, 139.44, 137.63, 136.17, 135.27, 133.90, 133.80, 130.52 (d, *J* = 9.09 Hz), 130.09, 129.17, 128.21, 127.65, 125.81 (d, *J* = 4.04 Hz), 125.70 (d, *J* = 3.03 Hz), 117.48 (d, *J* = 20.2 Hz), 116.84 (d, *J* = 23.23 Hz), 107.10, 21.14. <sup>19</sup>F NMR (376 MHz, CDCl<sub>3</sub>) δ -111.02 (s, 1F). HRMS (ESI-TOF) *m/z* Calcd for C<sub>23</sub>H<sub>16</sub>FN<sub>3</sub>O<sub>2</sub>S<sub>3</sub> [M+H]<sup>+</sup>: 482.0467, found: 482.0459.

**(E)-N-(2-(2-fluorophenyl)-1-isothiocyanato-2-thiocyanatovinyl)-N-(*p*-tolyl)benzenesulfonamide (5l)**

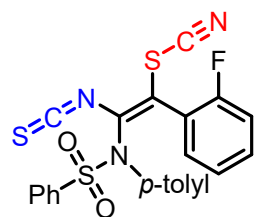

<sup>1</sup>H NMR (400 MHz, CDCl<sub>3</sub>) δ 7.61 – 7.54 (m, 3H), 7.53 – 7.46 (m, 2H), 7.46 – 7.41 (m, 2H), 7.32 – 7.27 (m, 1H), 7.08 (t, *J* = 8.5 Hz, 1H), 6.98 (d, *J* = 8.4 Hz, 2H), 6.55 (d, *J* = 8.4 Hz, 2H), 2.30 (s, 3H). <sup>13</sup>C NMR (100 MHz, CDCl<sub>3</sub>) δ 159.62 (d, *J* = 252.50 Hz), 141.05, 139.31, 137.75, 135.04,

133.72, 132.75 (d, *J* = 8.08 Hz), 131.95, 129.98, 129.13, 128.18, 127.72, 126.72, 124.64 (d, *J* = 3.03 Hz), 121.97, 119.81 (d, *J* = 14.14 Hz), 115.98 (d, *J* = 20.2 Hz), 107.13, 21.16. <sup>19</sup>F NMR (376 MHz,

CDCl<sub>3</sub>) δ -110.23 (s, 1F). HRMS (ESI-TOF) m/z Calcd for C<sub>23</sub>H<sub>16</sub>FN<sub>3</sub>O<sub>2</sub>S<sub>3</sub> [M+H]<sup>+</sup>: 482.0467, found: 482.0471.

#### 5-methyl-3-phenyl-1-(phenylsulfonyl)-2-thiocyanatoindoline (7a)

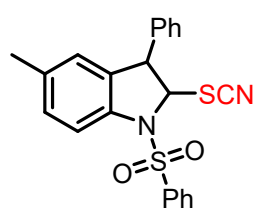

<sup>1</sup>H NMR (400 MHz, CDCl<sub>3</sub>) δ 7.60 (t, *J* = 7.4 Hz, 1H), 7.53 (d, *J* = 7.3 Hz, 2H), 7.47 – 7.42 (m, 5H), 7.25 (d, *J* = 2.8 Hz, 1H), 7.03 (d, *J* = 8.2 Hz, 2H), 6.83 (d, *J* = 10.5 Hz, 1H), 6.52 (d, *J* = 7.9 Hz, 2H), 4.03 (d, *J* = 10.5 Hz, 1H), 2.33 (s, 3H). <sup>13</sup>C NMR (100 MHz, CDCl<sub>3</sub>) δ 141.55, 140.41, 137.57, 133.68, 133.08, 130.85, 130.45, 130.02, 129.92, 129.42, 129.14, 128.36, 128.20, 109.51, 72.35, 56.08, 21.29. HRMS (ESI-TOF) m/z Calcd for C<sub>22</sub>H<sub>18</sub>O<sub>2</sub>S<sub>2</sub>N<sub>2</sub> [M+H]<sup>+</sup>: 406.0810, found: 406.0812.

#### 5-fluoro-3-phenyl-1-(phenylsulfonyl)-2-thiocyanatoindoline (7b)

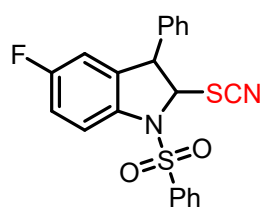

<sup>1</sup>H NMR (400 MHz, CDCl<sub>3</sub>) δ 7.63 (t, *J* = 7.0 Hz, 2H), 7.56 – 7.53 (m, 2H), 7.52 – 7.45 (m, 6H), 6.97 – 6.90 (m, 2H), 6.84 (d, *J* = 10.5 Hz, 1H), 6.62 (s, 1H), 3.99 (d, *J* = 10.5 Hz, 1H). <sup>13</sup>C NMR (100 MHz, CDCl<sub>3</sub>) δ 163.14 (d, *J* = 252.5 Hz), 142.45, 137.22, 133.88, 133.06 (d, *J* = 9.09 Hz), 131.51 (d, *J* = 269.67 Hz), 129.66, 129.52, 129.24, 128.76, 128.32, 128.26, 128.18, 116.30 (d, *J* = 23.23 Hz), 109.27, 72.35, 56.14. <sup>19</sup>F NMR (376 MHz, CDCl<sub>3</sub>) δ -109.21 (s, 1F). HRMS (ESI-TOF) m/z Calcd for C<sub>21</sub>H<sub>15</sub>O<sub>2</sub>S<sub>2</sub>N<sub>2</sub>F [M+H]<sup>+</sup>: 411.0632, found: 411.0629.

#### 5-(tert-butyl)-3-phenyl-1-(phenylsulfonyl)-2-thiocyanatoindoline (7c)

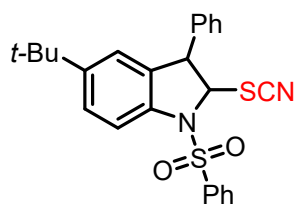

<sup>1</sup>H NMR (400 MHz, CDCl<sub>3</sub>) δ 7.61 (t, *J* = 7.4 Hz, 1H), 7.55 (d, *J* = 7.3 Hz, 2H), 7.47 (dd, *J* = 6.6, 2.4 Hz, 5H), 7.27 – 7.24 (m, 3H), 6.82 (d, *J* = 10.5 Hz, 1H), 6.58 (d, *J* = 8.4 Hz, 2H), 4.06 (d, *J* = 10.5 Hz, 1H), 1.30 (s, 9H). <sup>13</sup>C NMR (100 MHz, CDCl<sub>3</sub>) δ 153.45, 141.29, 137.71, 133.63, 133.08, 130.56, 130.39, 130.01, 129.41, 129.14, 128.37, 128.18, 126.20, 109.54, 72.42, 56.02, 34.85, 31.24. HRMS (ESI-TOF) m/z Calcd for C<sub>25</sub>H<sub>24</sub>O<sub>2</sub>S<sub>2</sub>N<sub>2</sub> [M+H]<sup>+</sup>: 448.1279, found: 448.1277.

### 5-ethyl-3-phenyl-1-(phenylsulfonyl)-2-thiocyanatoindoline (7d)

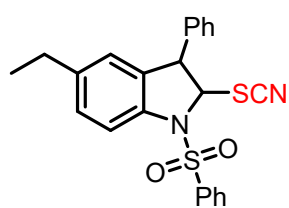

$^1\text{H}$  NMR (400 MHz,  $\text{CDCl}_3$ )  $\delta$  7.61 (t,  $J = 7.3$  Hz, 1H), 7.54 (d,  $J = 7.4$  Hz, 2H), 7.48 – 7.43 (m, 5H), 7.26 (d,  $J = 2.8$  Hz, 1H), 7.06 (d,  $J = 8.3$  Hz, 2H), 6.82 (d,  $J = 10.5$  Hz, 1H), 6.55 (d,  $J = 8.1$  Hz, 2H), 4.05 (d,  $J = 10.5$  Hz, 1H), 2.64 (q,  $J = 7.6$  Hz, 2H), 1.23 (t,  $J = 7.6$  Hz, 3H).  $^{13}\text{C}$

NMR (100 MHz,  $\text{CDCl}_3$ )  $\delta$  146.50, 141.51, 137.66, 133.62, 133.08, 130.92, 130.63, 130.01, 129.40, 129.11, 128.64, 128.36, 128.20, 109.46, 72.41, 56.10, 28.49, 15.10. HRMS (ESI-TOF)  $m/z$  Calcd for  $\text{C}_{23}\text{H}_{20}\text{O}_2\text{S}_2\text{N}_2$   $[\text{M}+\text{H}]^+$ : 420.0966, found: 420.0965.

### methyl 3-phenyl-1-(phenylsulfonyl)-2-thiocyanatoindoline-5-carboxylate (7e)

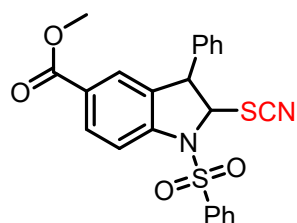

$^1\text{H}$  NMR (400 MHz,  $\text{CDCl}_3$ )  $\delta$  7.91 (d,  $J = 8.7$  Hz, 2H), 7.64 (t,  $J = 7.3$  Hz, 1H), 7.56 – 7.51 (m, 2H), 7.50 – 7.45 (m, 4H), 7.20 (dd,  $J = 7.3$ , 1.8 Hz, 2H), 6.85 (d,  $J = 10.6$  Hz, 1H), 6.74 (d,  $J = 8.4$  Hz, 2H), 4.00 (d,  $J = 10.6$  Hz, 1H), 3.93 (s, 3H).  $^{13}\text{C}$  NMR (100 MHz,  $\text{CDCl}_3$ )  $\delta$

165.89, 142.80, 137.78, 137.24, 133.97, 132.72, 131.42, 130.86, 130.38, 130.19, 129.51, 129.30, 128.21, 128.11, 109.22, 72.38, 56.16, 52.56. HRMS (ESI-TOF)  $m/z$  Calcd for  $\text{C}_{23}\text{H}_{18}\text{O}_4\text{S}_2\text{N}_2$   $[\text{M}+\text{H}]^+$ : 450.0708, found: 450.0778.

### 6-methyl-3-phenyl-1-(phenylsulfonyl)-2-thiocyanatoindoline (7f)

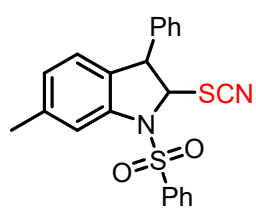

$^1\text{H}$  NMR (400 MHz,  $\text{CDCl}_3$ )  $\delta$  7.62 (t,  $J = 7.4$  Hz, 1H), 7.55 (d,  $J = 7.3$  Hz, 2H), 7.46 (p,  $J = 4.8$ , 4.1 Hz, 5H), 7.25 – 7.23 (m, 1H), 7.18 (d,  $J = 7.6$  Hz, 1H), 7.11 (t,  $J = 7.7$  Hz, 1H), 6.80 (d,  $J = 10.5$  Hz, 1H), 6.40 (d,  $J = 37.0$  Hz, 2H), 4.02 (d,  $J = 10.5$  Hz, 1H), 2.20 (s, 3H).  $^{13}\text{C}$  NMR (100 MHz,

$\text{CDCl}_3$ )  $\delta$  141.59, 139.31, 137.58, 133.68, 133.10, 132.20, 130.79, 130.02, 129.34, 129.08, 128.88, 128.36, 128.22, 127.54, 109.45, 72.35, 56.12, 21.21. HRMS (ESI-TOF)  $m/z$  Calcd for  $\text{C}_{22}\text{H}_{18}\text{O}_2\text{S}_2\text{N}_2$   $[\text{M}+\text{H}]^+$ : 406.0810, found: 406.0812.

### 1-(naphthalen-1-ylsulfonyl)-3-phenyl-2-thiocyanatoindoline (7g)

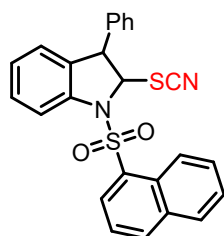

$^1\text{H}$  NMR (400 MHz,  $\text{CDCl}_3$ )  $\delta$  8.15 (s, 1H), 7.93 – 7.85 (m, 3H), 7.66 (t,  $J = 7.5$  Hz, 1H), 7.59 (t,  $J = 7.5$  Hz, 1H), 7.47 – 7.43 (m, 4H), 7.36 (t,  $J = 7.4$  Hz,



1H), 7.26 (dd,  $J = 5.7, 2.3$  Hz, 1H), 7.21 (t,  $J = 7.9$  Hz, 2H), 6.93 (d,  $J = 10.5$  Hz, 1H), 6.67 (d,  $J = 7.7$  Hz, 2H), 4.04 (d,  $J = 10.5$  Hz, 1H).  $^{13}\text{C}$  NMR (100 MHz,  $\text{CDCl}_3$ )  $\delta$  142.14, 135.11, 134.31, 133.33, 132.94, 131.95, 131.07, 129.97, 129.89, 129.46, 129.34, 129.29, 129.19, 129.15, 128.25, 127.85, 127.62, 109.36, 72.38, 56.00. HRMS (ESI-TOF)  $m/z$  Calcd for  $\text{C}_{25}\text{H}_{18}\text{O}_2\text{S}_2\text{N}_2$   $[\text{M}+\text{H}]^+$ : 442.0810, found: 442.0811.

### 3-phenyl-2-thiocyanato-1-tosylindoline (7h)

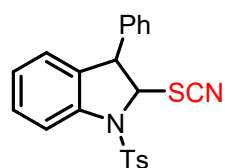

$^1\text{H}$  NMR (400 MHz,  $\text{CDCl}_3$ )  $\delta$  7.47 – 7.43 (m, 3H), 7.41 (d,  $J = 8.3$  Hz, 2H), 7.36 (d,  $J = 7.5$  Hz, 1H), 7.26 – 7.21 (m, 6H), 6.84 (d,  $J = 10.5$  Hz, 1H), 6.66 (d,  $J = 7.6$  Hz, 2H), 4.03 (d,  $J = 10.5$  Hz, 1H), 2.42 (s, 3H).  $^{13}\text{C}$  NMR (100 MHz, Chloroform- $d$ )  $\delta$  144.78, 131.10, 130.01, 129.98, 129.75, 129.40, 129.20, 128.33, 128.21, 109.46, 72.36, 56.15, 21.71. HRMS (ESI-TOF)  $m/z$  Calcd for  $\text{C}_{22}\text{H}_{19}\text{O}_2\text{S}_2\text{N}_2$   $[\text{M}+\text{H}]^+$ : 407.0882, found: 407.0881.

### 3-phenyl-1-(phenylsulfonyl)-2-thiocyanatoindoline (7i)

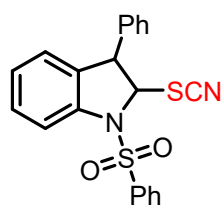

$^1\text{H}$  NMR (400 MHz,  $\text{CDCl}_3$ )  $\delta$  7.61 (t,  $J = 7.4$  Hz, 1H), 7.55 – 7.51 (m, 2H), 7.48 – 7.42 (m, 5H), 7.37 (t,  $J = 7.4$  Hz, 1H), 7.25 – 7.21 (m, 3H), 6.85 (d,  $J = 10.5$  Hz, 1H), 6.65 (d,  $J = 7.6$  Hz, 2H), 4.03 (d,  $J = 10.5$  Hz, 1H).  $^{13}\text{C}$  NMR (100 MHz, Chloroform- $d$ )  $\delta$  137.48, 133.74, 133.39, 133.00, 131.08, 130.08, 130.07, 129.43, 129.25, 129.16, 128.32, 128.19, 72.36, 56.10. HRMS (ESI-TOF)  $m/z$  Calcd for  $\text{C}_{21}\text{H}_{17}\text{O}_2\text{S}_2\text{N}_2$   $[\text{M}+\text{H}]^+$ : 393.0726, found: 393.0723.

## 3. References

1. F. Pan, X.-L. Li, X.-M. Chen, C. Shu, P.-P. Ruan, C.-H. Shen, X. Lu and L.-W. Ye, *ACS Catalysis*, 2016, **6**, 6055-6062.
2. Z. Zeng, H. Jin, J. Xie, B. Tian, M. Rudolph, F. Rominger and A. S. Hashmi, *Org Lett*, 2017, **19**, 1020-1023.
3. L. Zhu, Y. Yu, Z. Mao and X. Huang, *Org Lett*, 2015, **17**, 30-33.
4. L. Liao, H. Zhang and X. Zhao, *ACS Catalysis*, 2018, **8**, 6745-6750.

## 4. $^1\text{H}$ NMR, $^{19}\text{F}$ NMR and $^{13}\text{C}$ NMR spectra

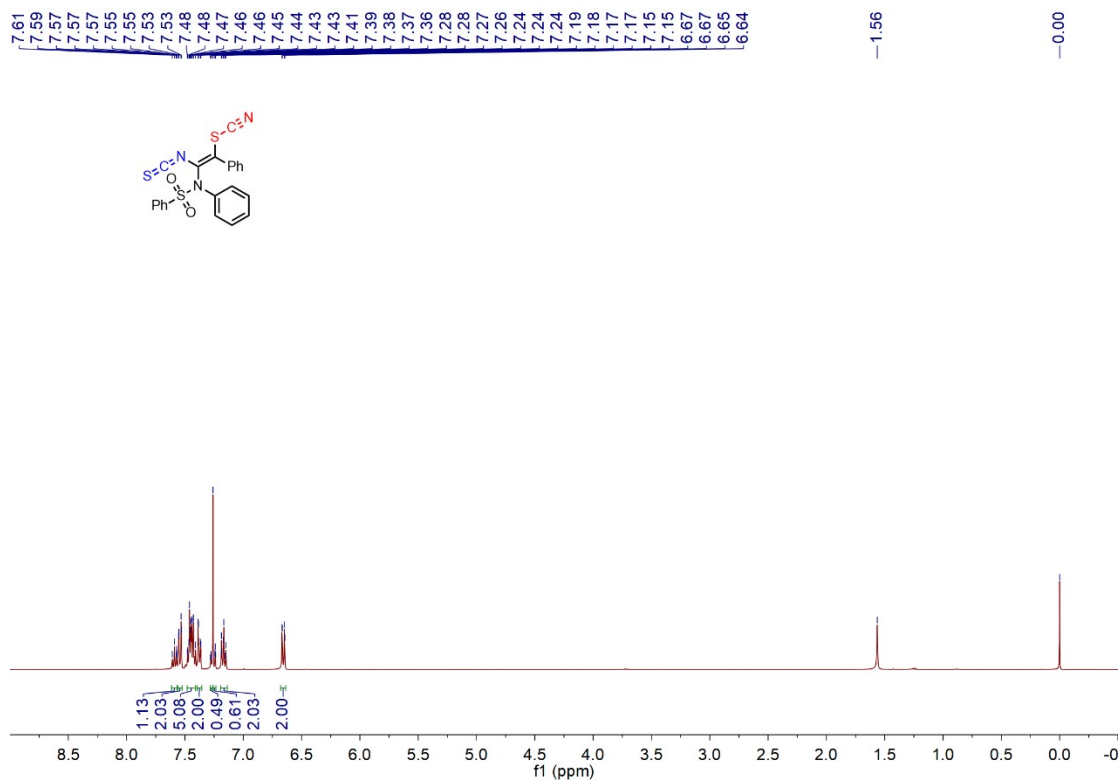

<sup>1</sup>H NMR Spectrum of Compound 3a (400 MHz, CDCl<sub>3</sub>)

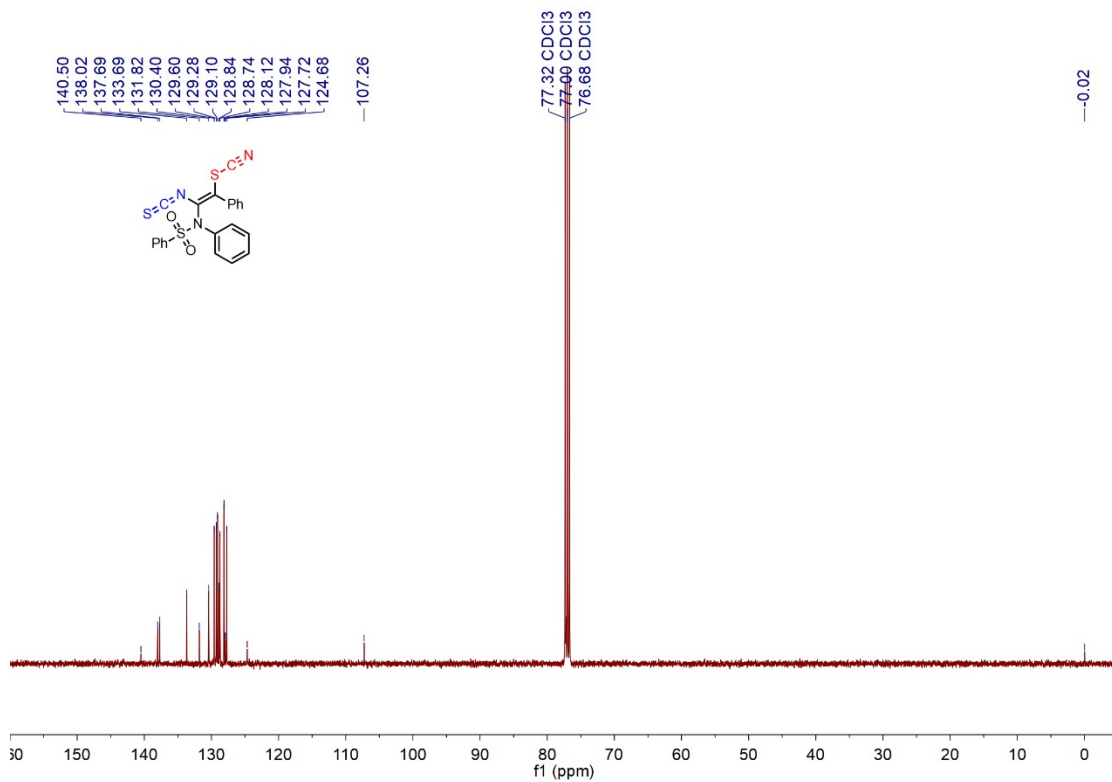

<sup>13</sup>C NMR Spectrum of Compound 3a (100 MHz, CDCl<sub>3</sub>)

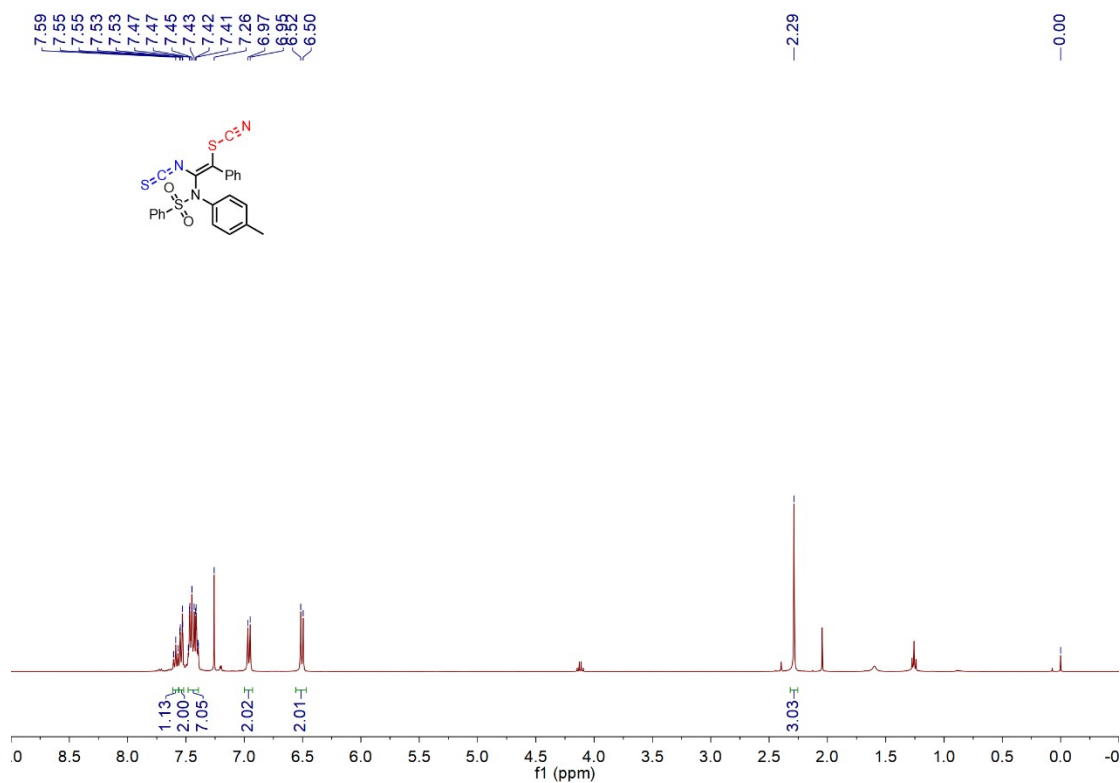

<sup>1</sup>H NMR Spectrum of Compound **3b** (400 MHz, CDCl<sub>3</sub>)

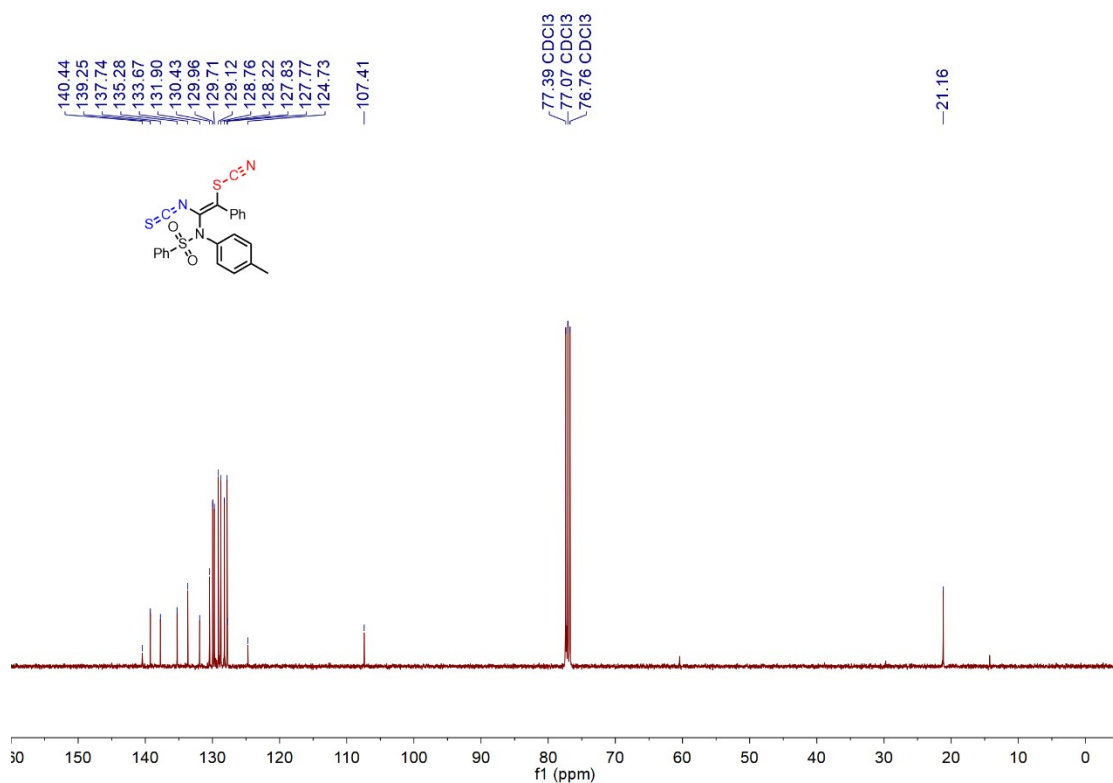

<sup>13</sup>C NMR Spectrum of Compound **3b** (100 MHz, CDCl<sub>3</sub>)

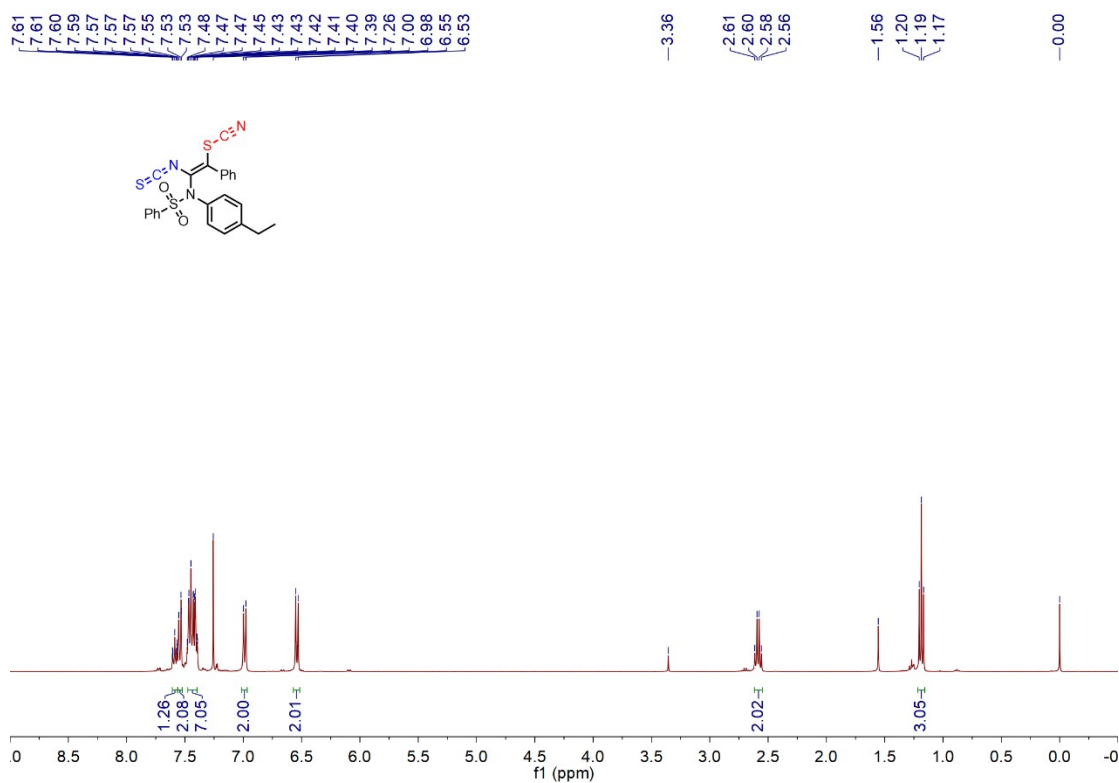

<sup>1</sup>H NMR Spectrum of Compound 3c (400 MHz, CDCl<sub>3</sub>)

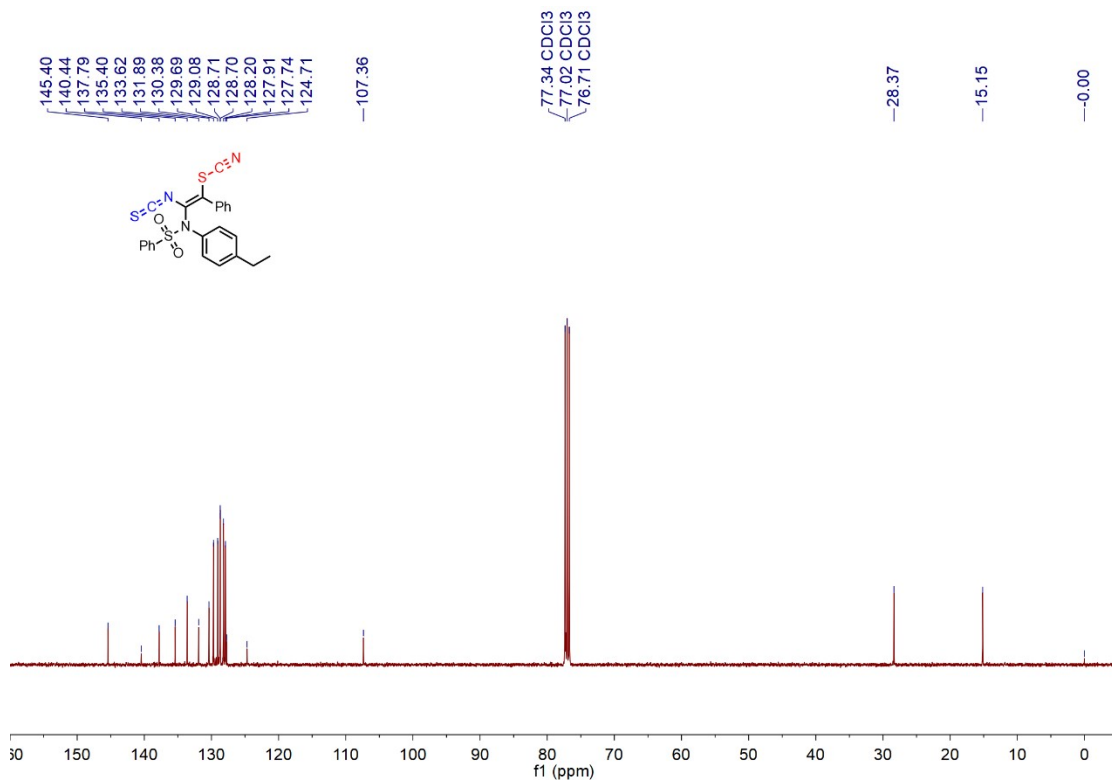

<sup>13</sup>C NMR Spectrum of Compound 3c (100 MHz, CDCl<sub>3</sub>)

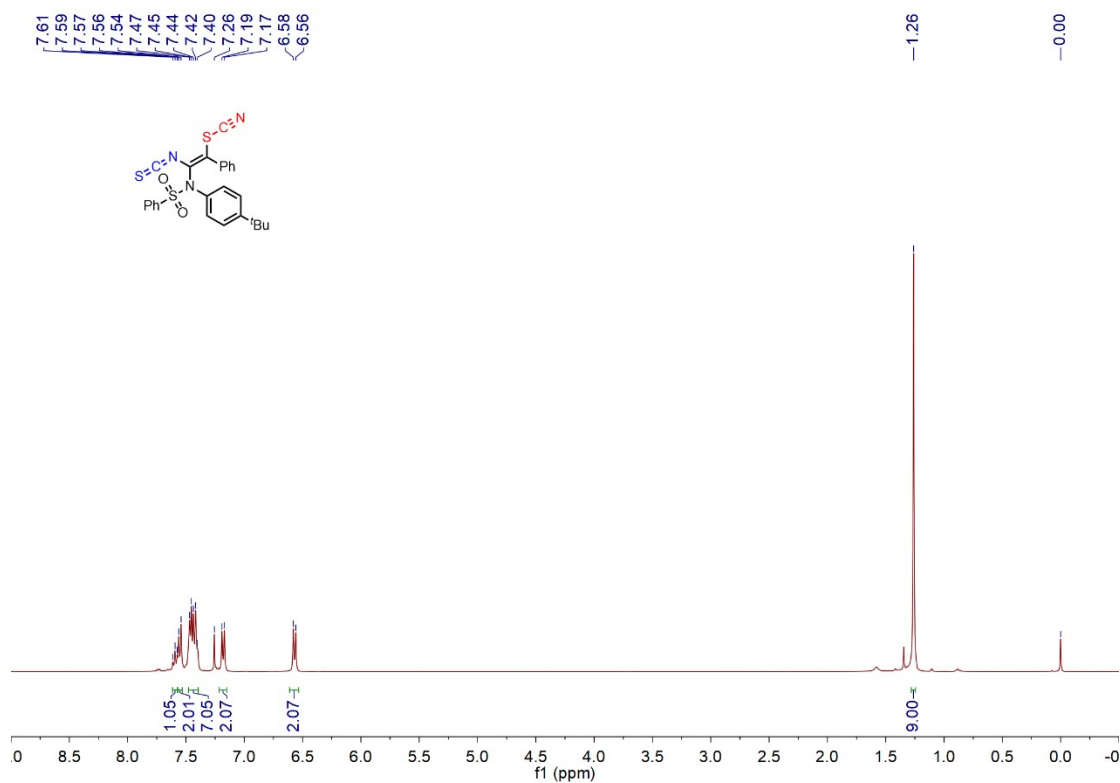

<sup>1</sup>H NMR Spectrum of Compound 3d (400 MHz, CDCl<sub>3</sub>)

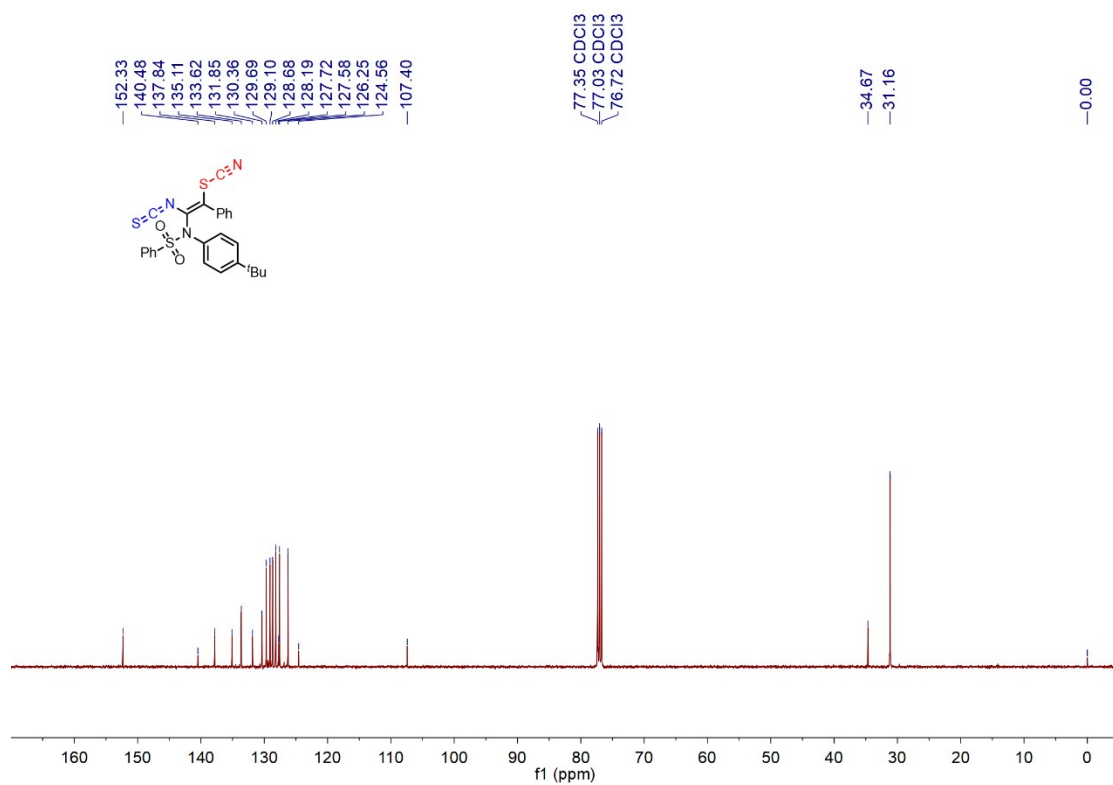

<sup>13</sup>C NMR Spectrum of Compound 3d (100 MHz, CDCl<sub>3</sub>)

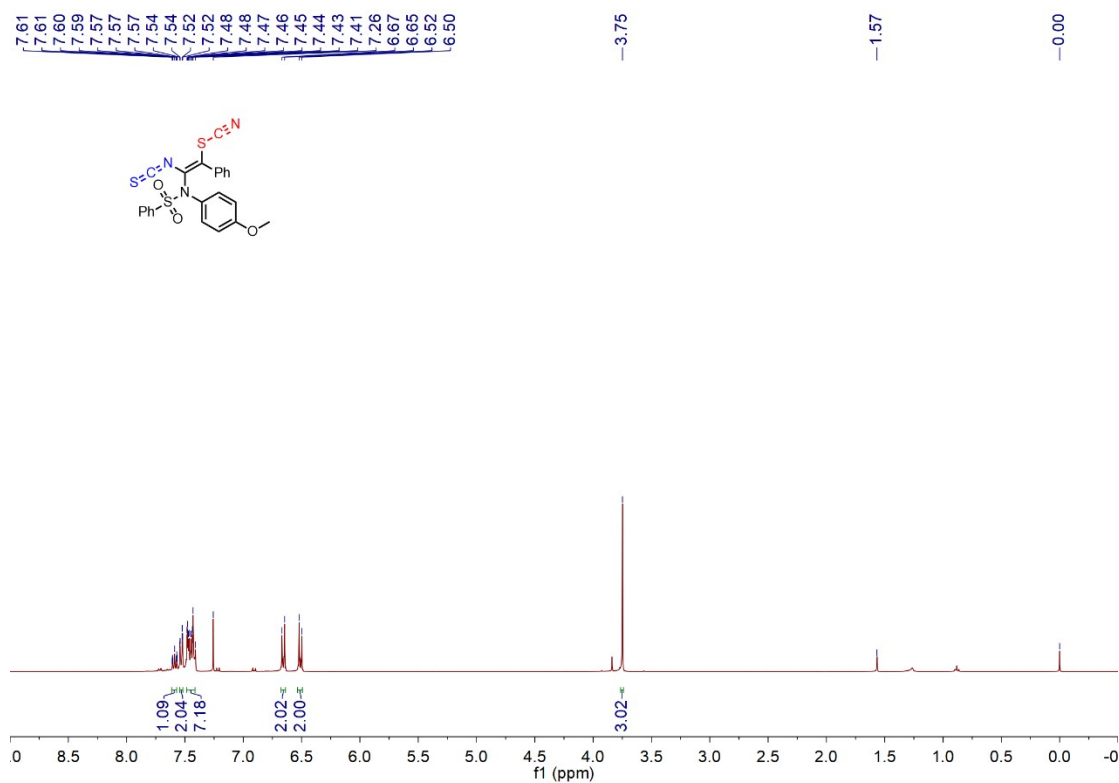

**<sup>1</sup>H NMR Spectrum of Compound 3e (400 MHz, CDCl<sub>3</sub>)**

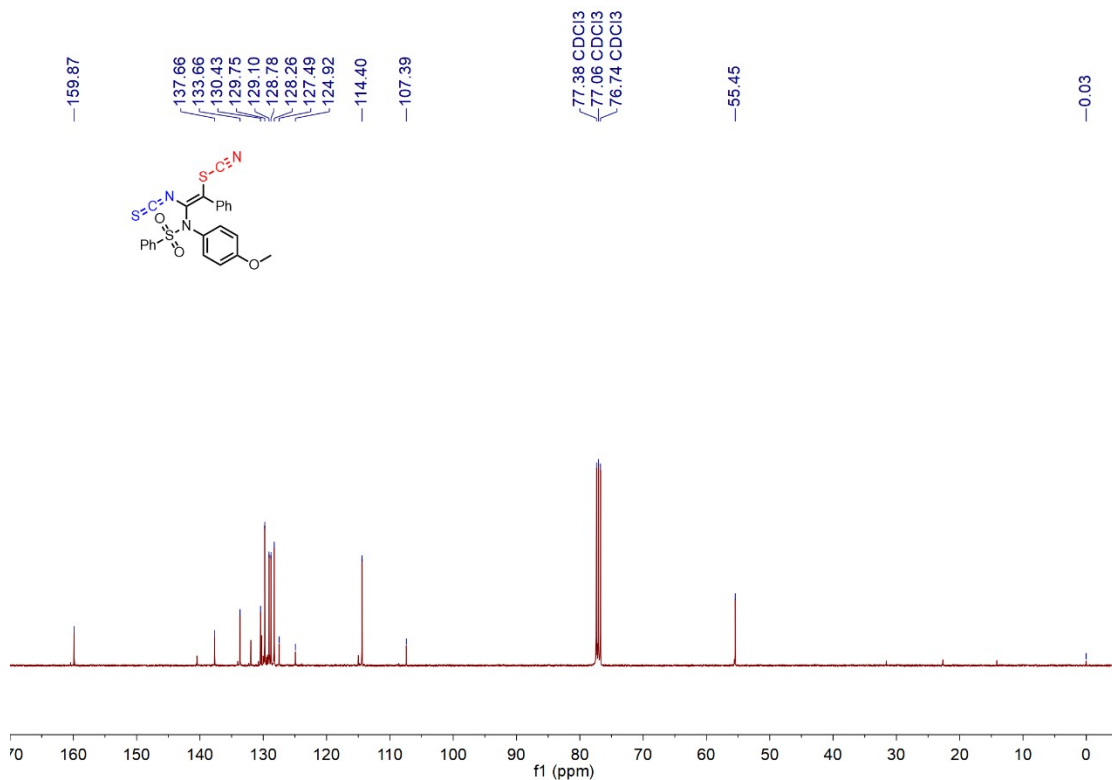

**<sup>13</sup>C NMR Spectrum of Compound 3e (100 MHz, CDCl<sub>3</sub>)**

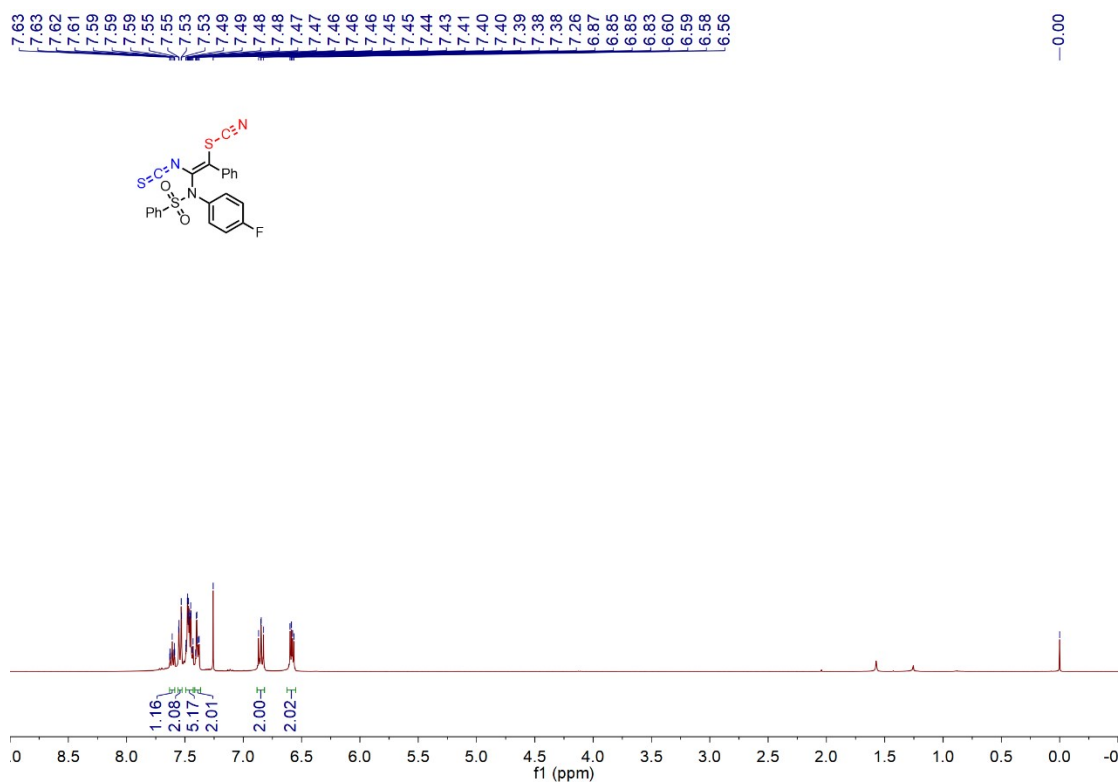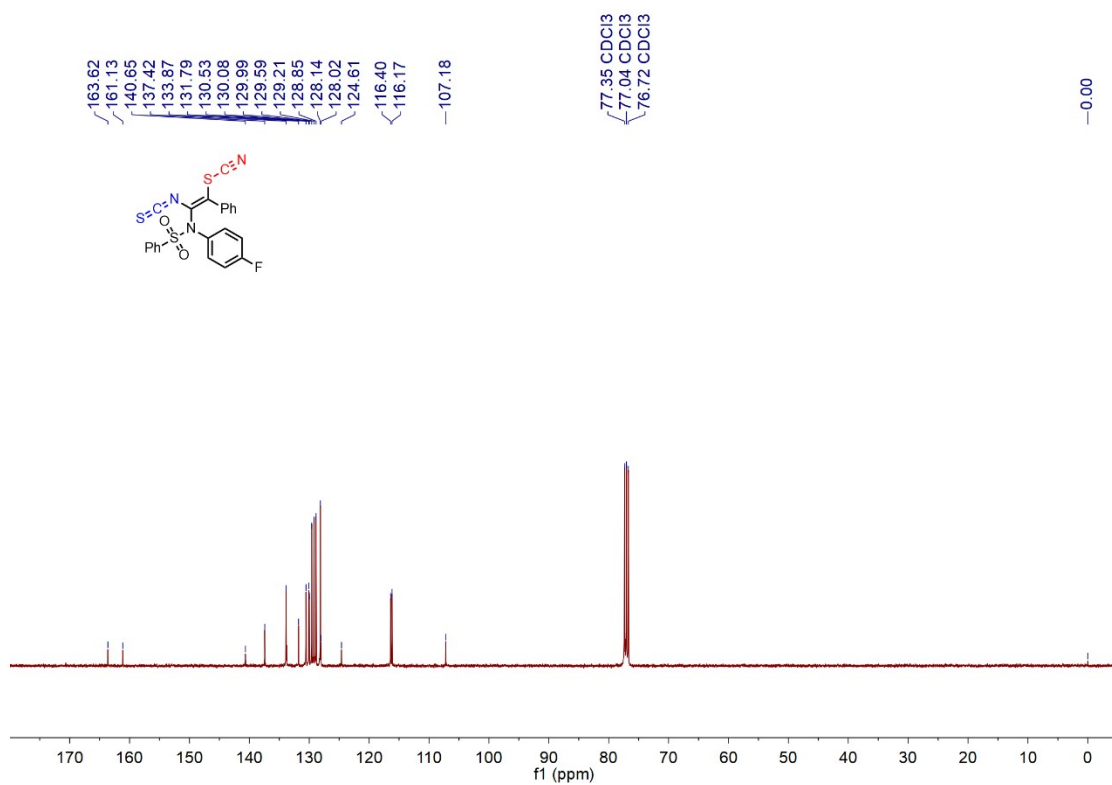

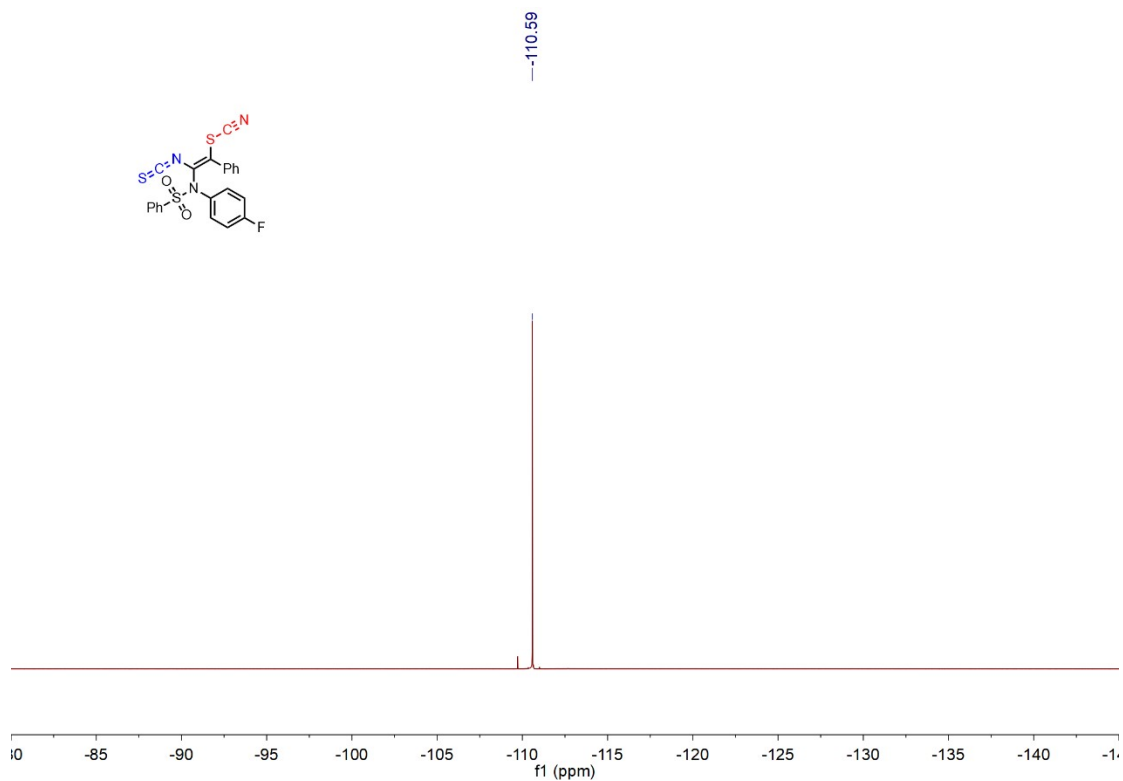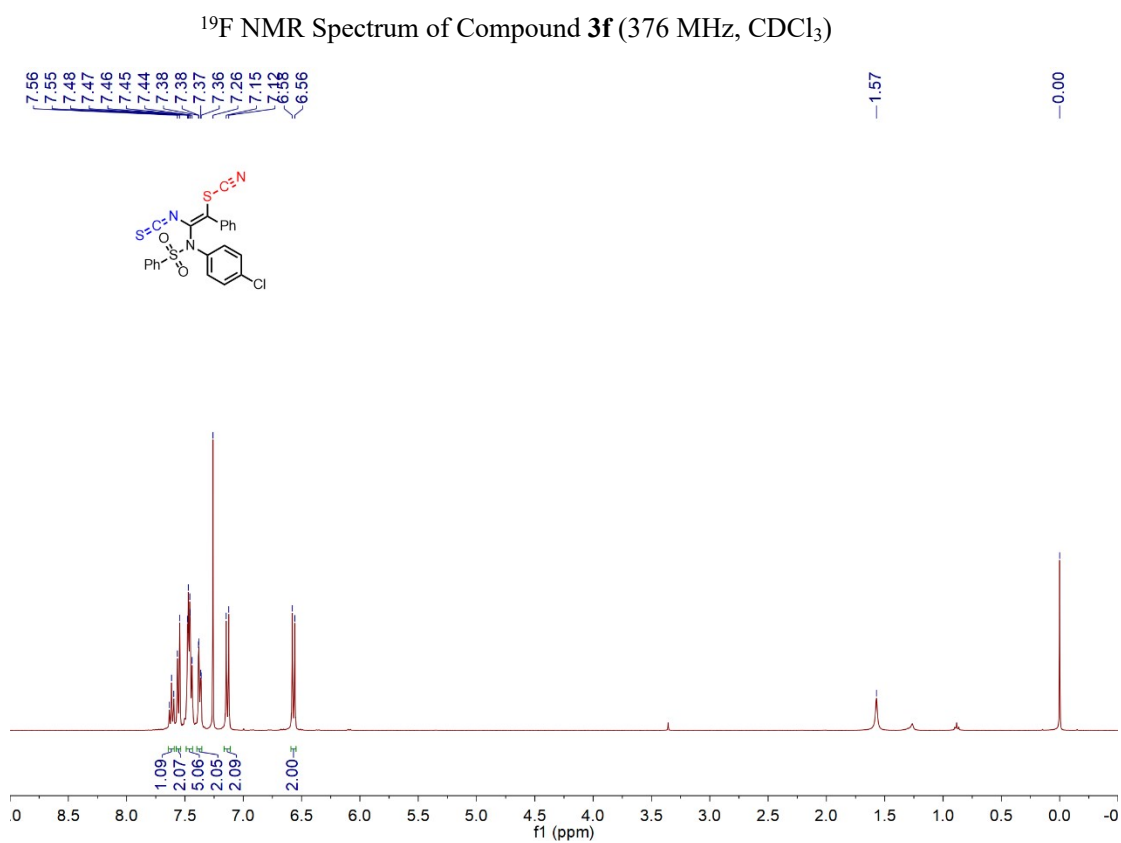



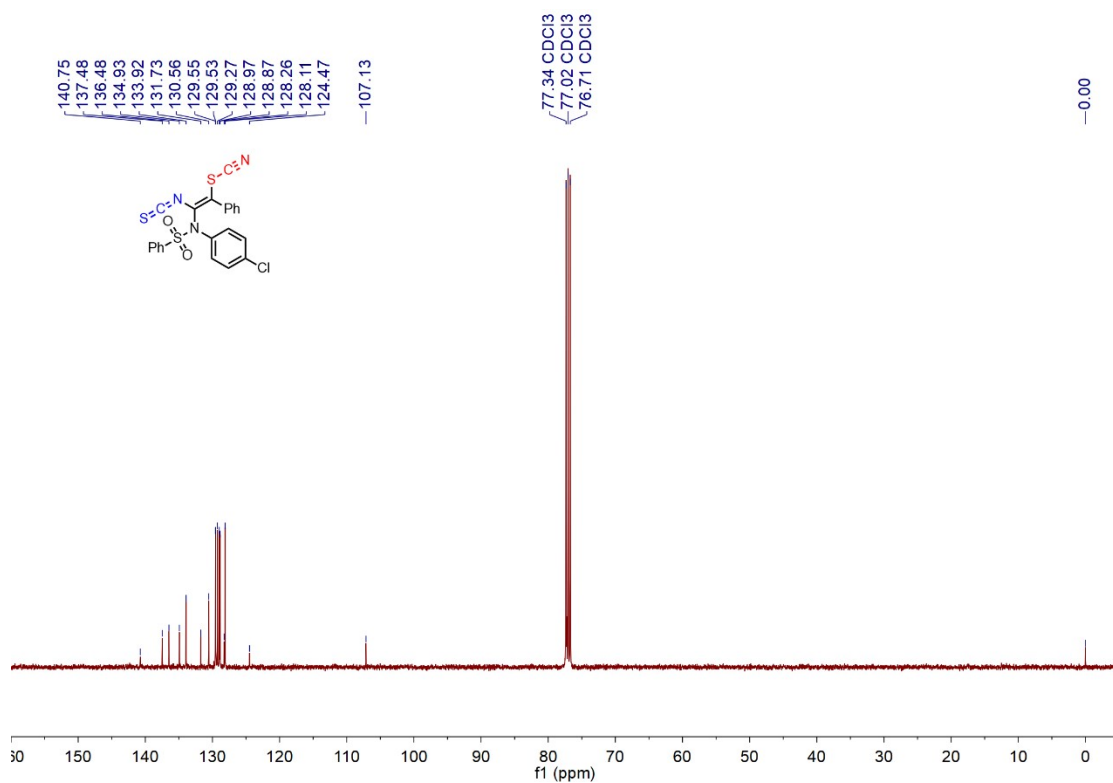

**<sup>13</sup>C NMR Spectrum of Compound 3g (100 MHz, CDCl<sub>3</sub>)**

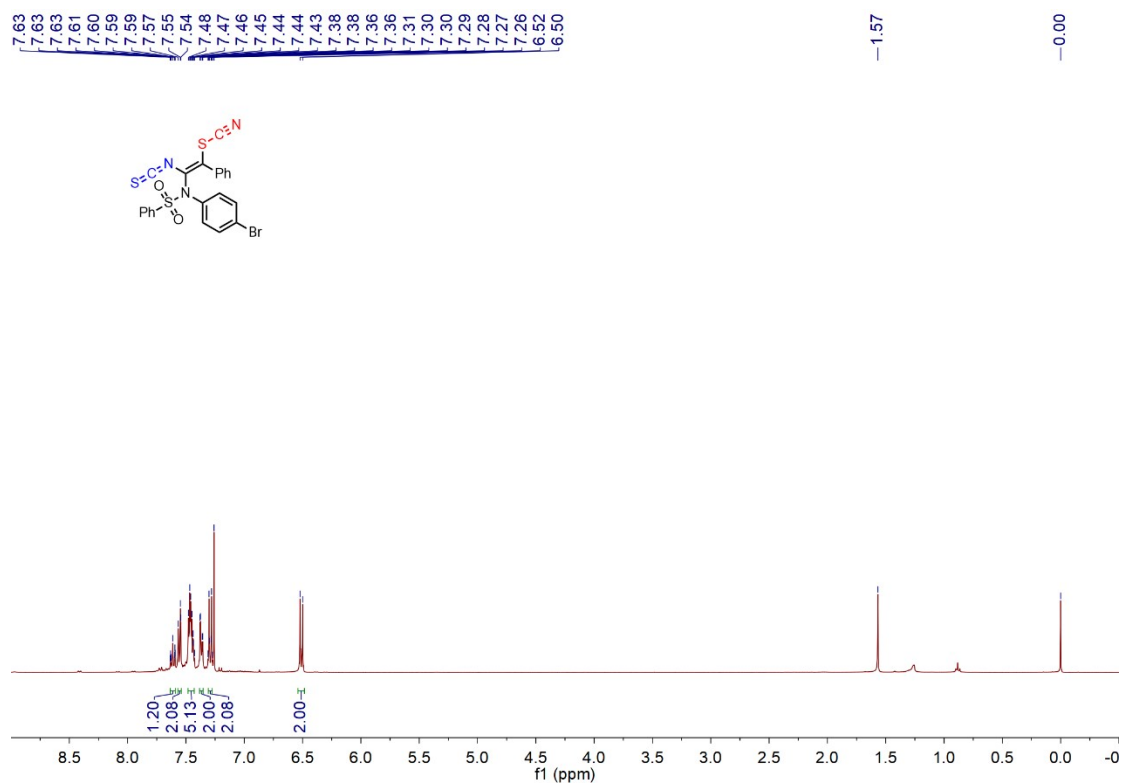

**<sup>1</sup>H NMR Spectrum of Compound 3h (400 MHz, CDCl<sub>3</sub>)**

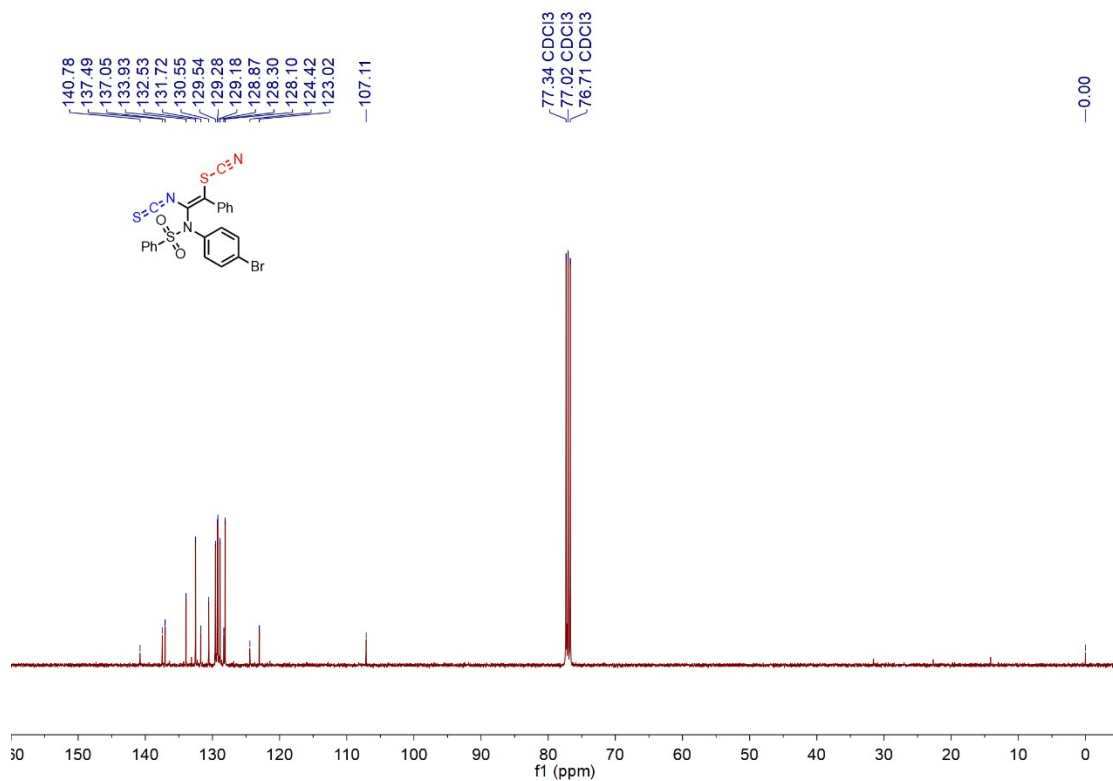

**<sup>13</sup>C NMR Spectrum of Compound 3h (100 MHz, CDCl<sub>3</sub>)**

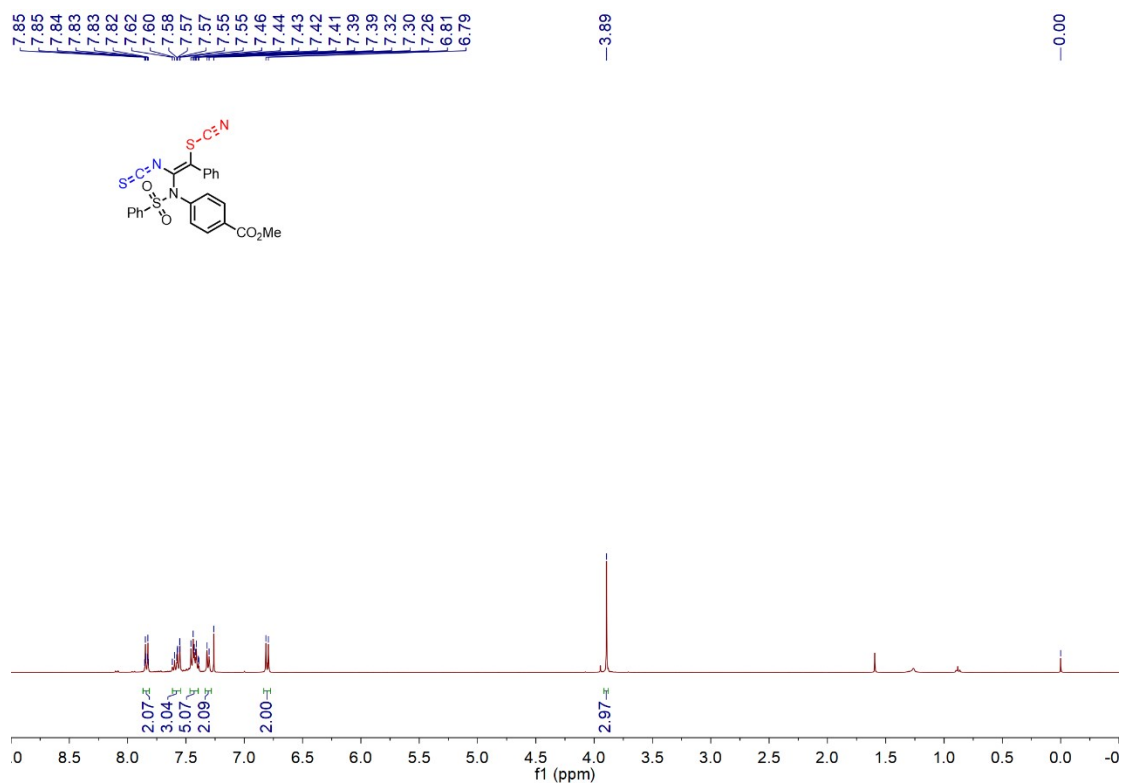

**<sup>1</sup>H NMR Spectrum of Compound 3i (400 MHz, CDCl<sub>3</sub>)**

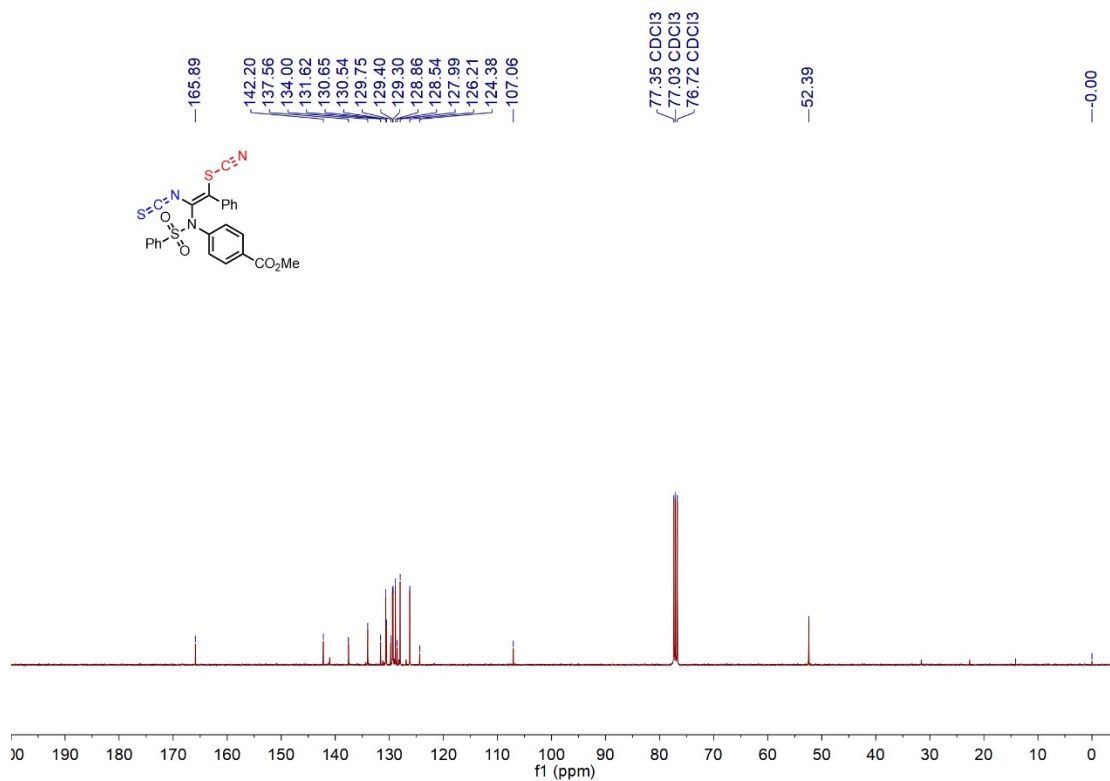

<sup>13</sup>C NMR Spectrum of Compound **3i** (100 MHz, CDCl<sub>3</sub>)

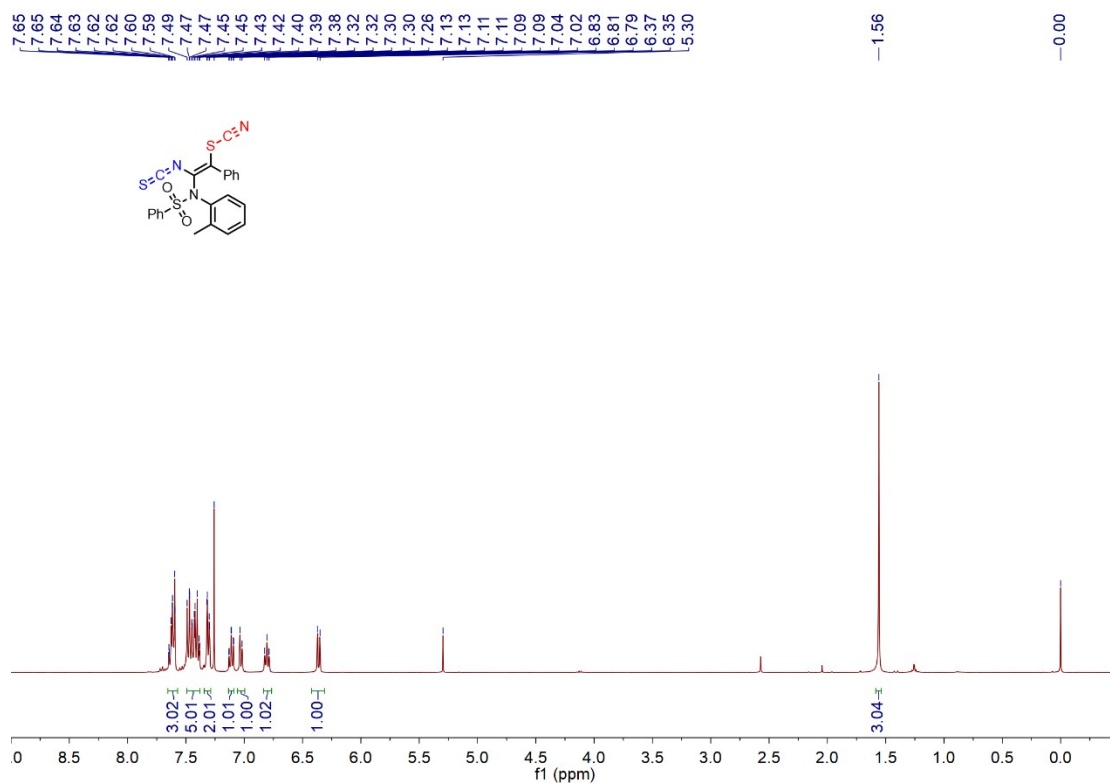

<sup>1</sup>H NMR Spectrum of Compound **3j** (400 MHz, CDCl<sub>3</sub>)

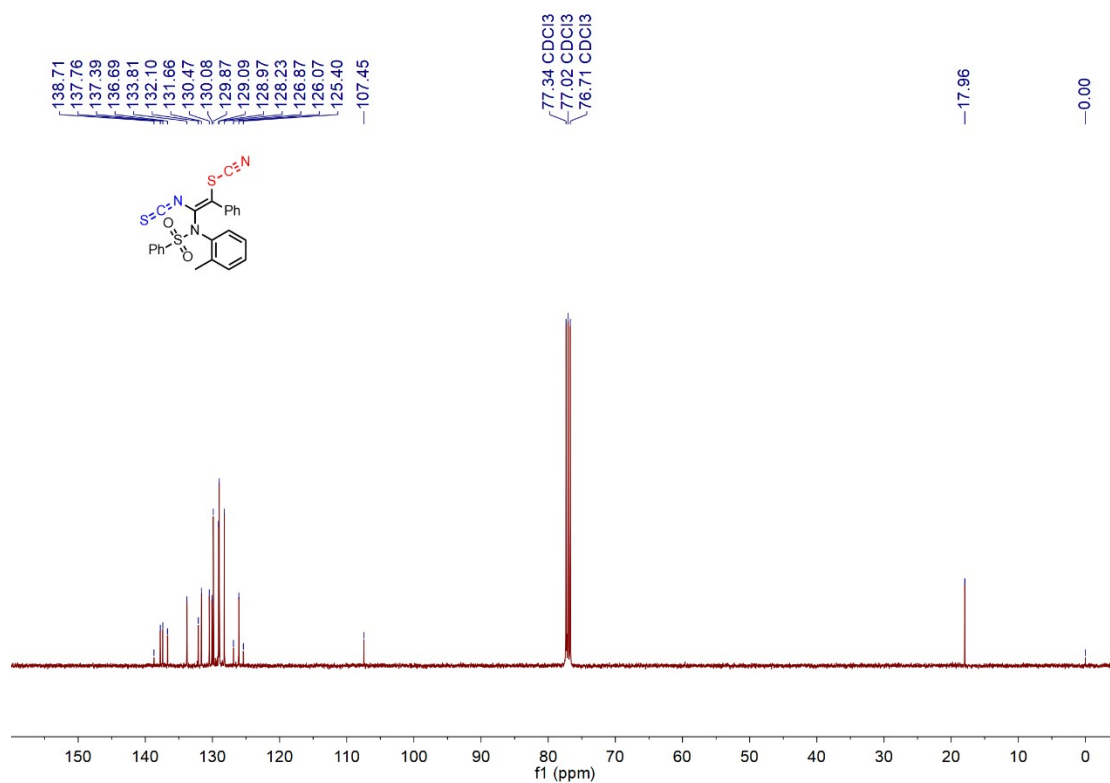

<sup>13</sup>C NMR Spectrum of Compound **3j** (100 MHz, CDCl<sub>3</sub>)

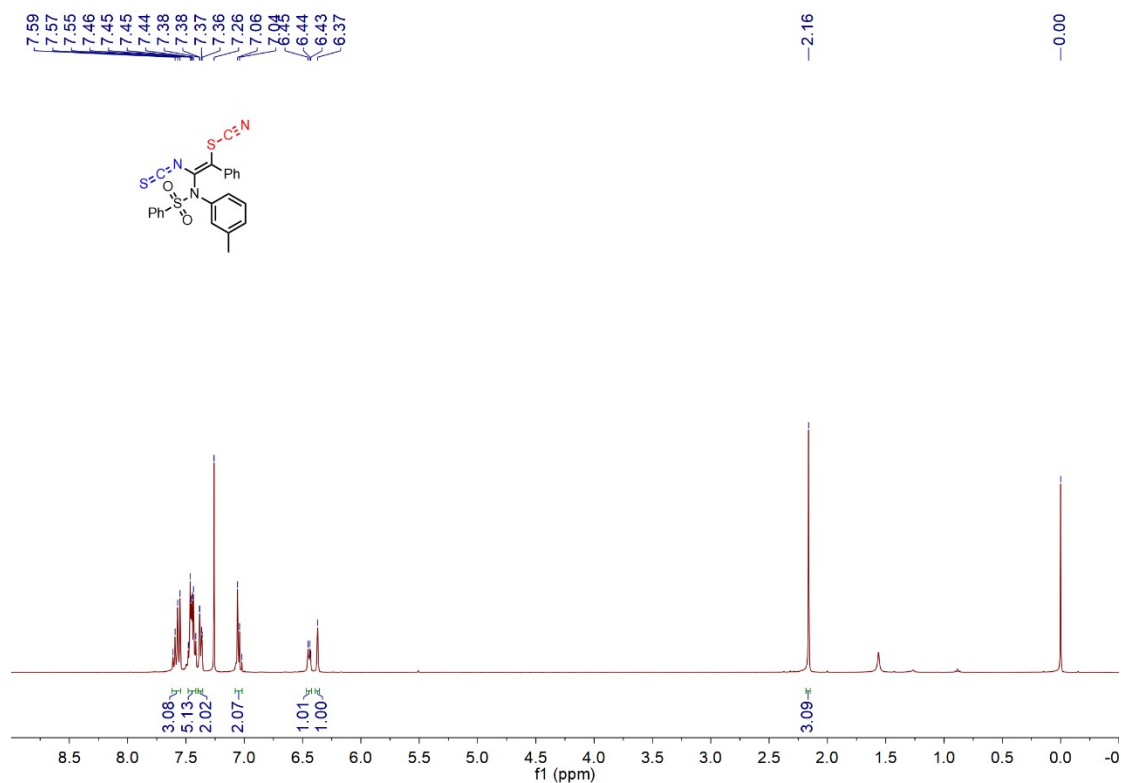

<sup>1</sup>H NMR Spectrum of Compound **3k** (400 MHz, CDCl<sub>3</sub>)

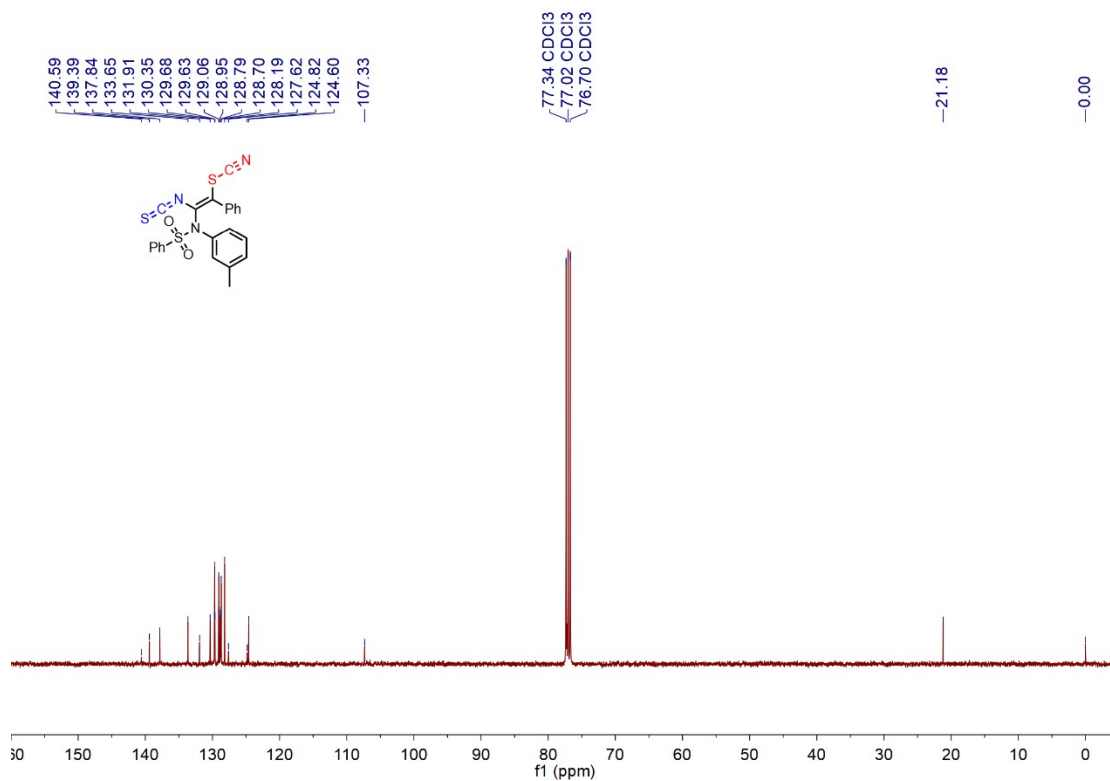

<sup>13</sup>C NMR Spectrum of Compound **3k** (100 MHz, CDCl<sub>3</sub>)

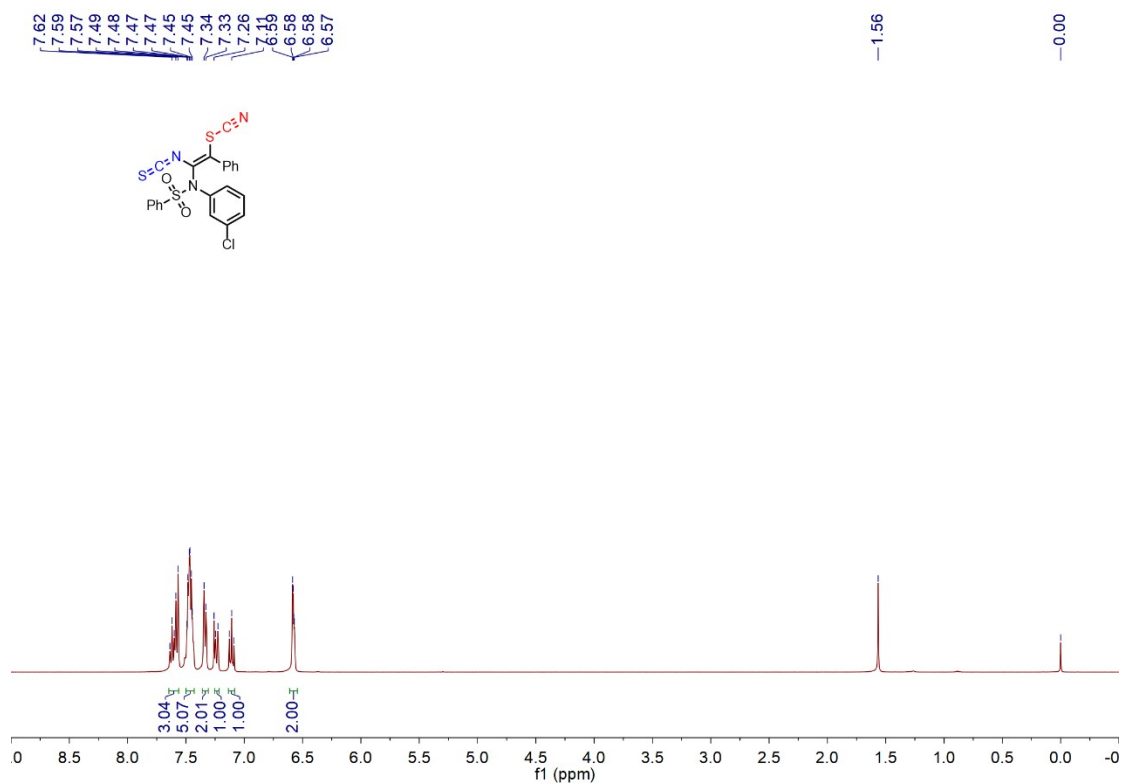

<sup>1</sup>H NMR Spectrum of Compound **3l** (400 MHz, CDCl<sub>3</sub>)

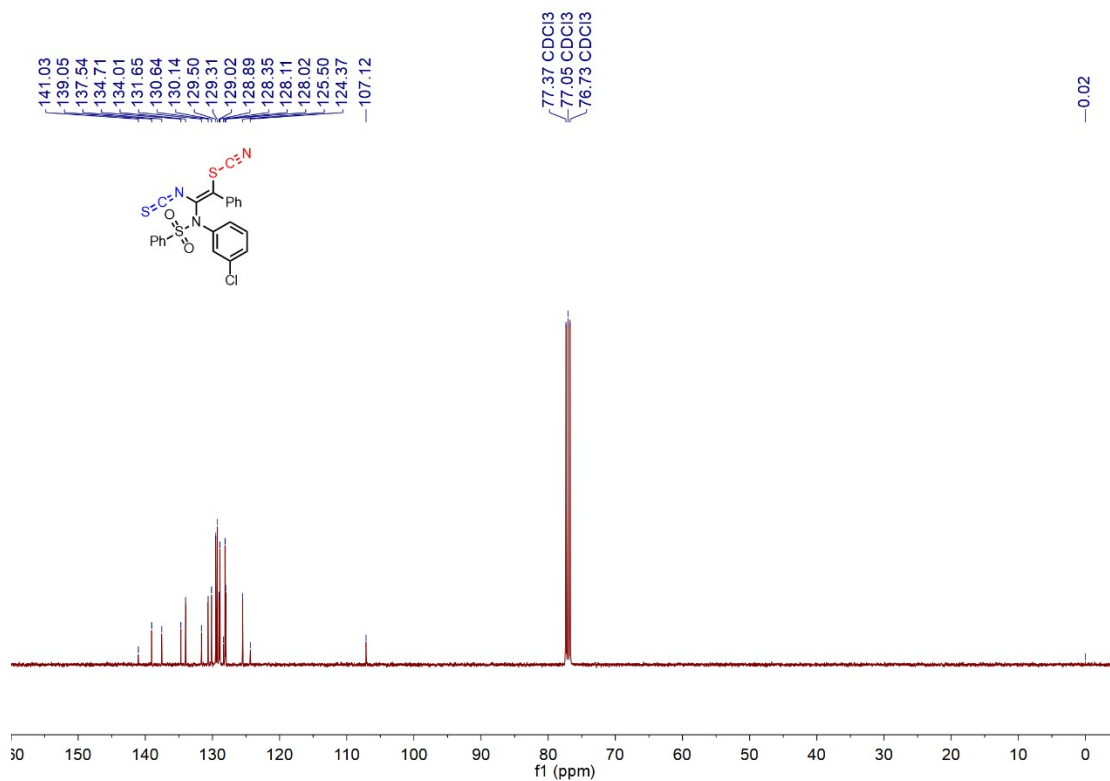

<sup>13</sup>C NMR Spectrum of Compound **31** (100 MHz, CDCl<sub>3</sub>)

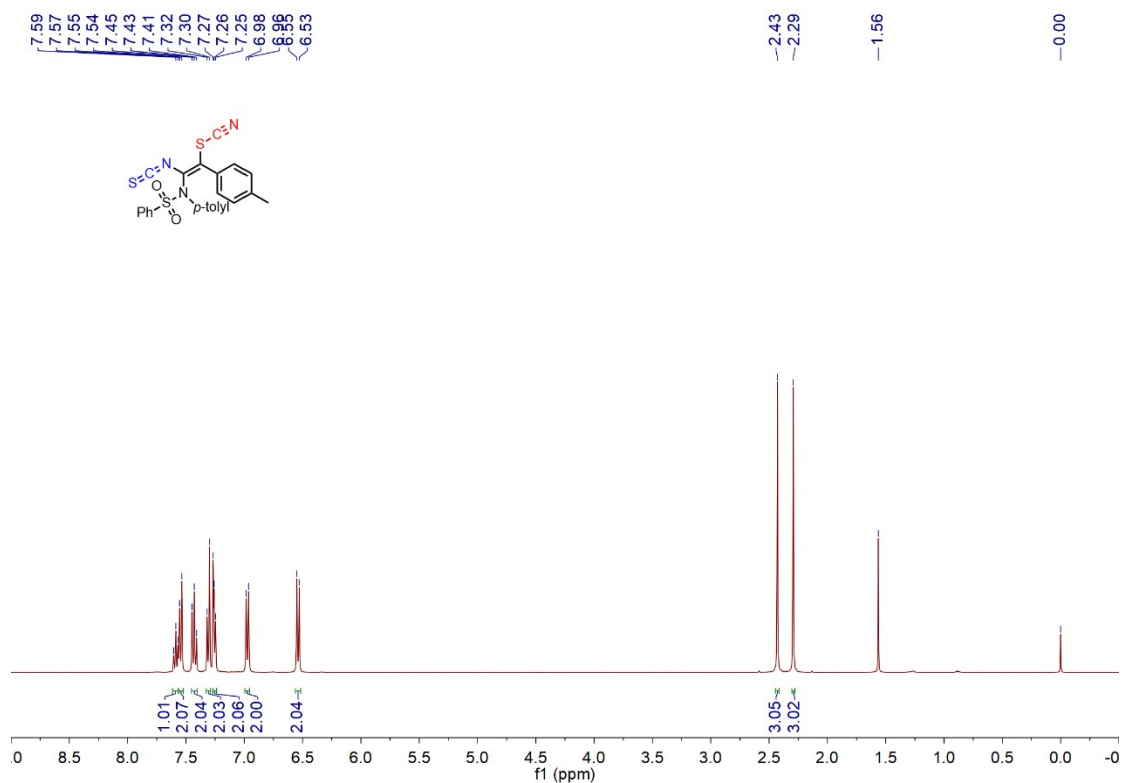

<sup>1</sup>H NMR Spectrum of Compound **5a** (400 MHz, CDCl<sub>3</sub>)

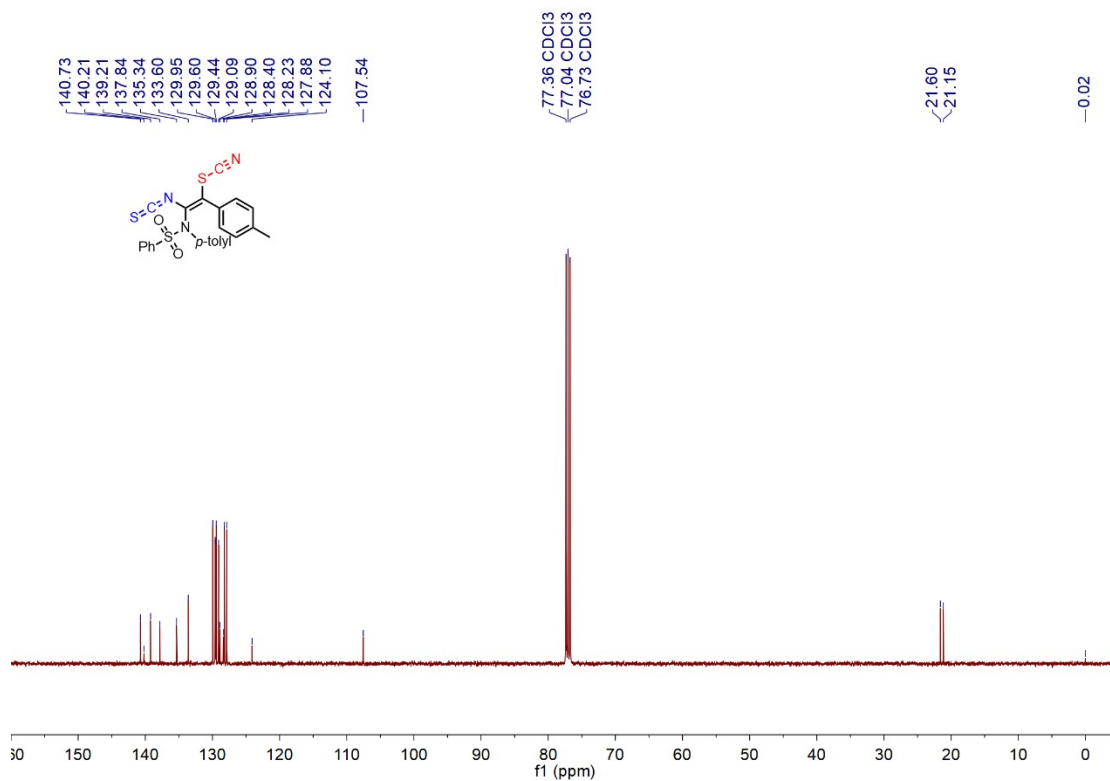

**<sup>13</sup>C NMR Spectrum of Compound 5a (100 MHz, CDCl<sub>3</sub>)**

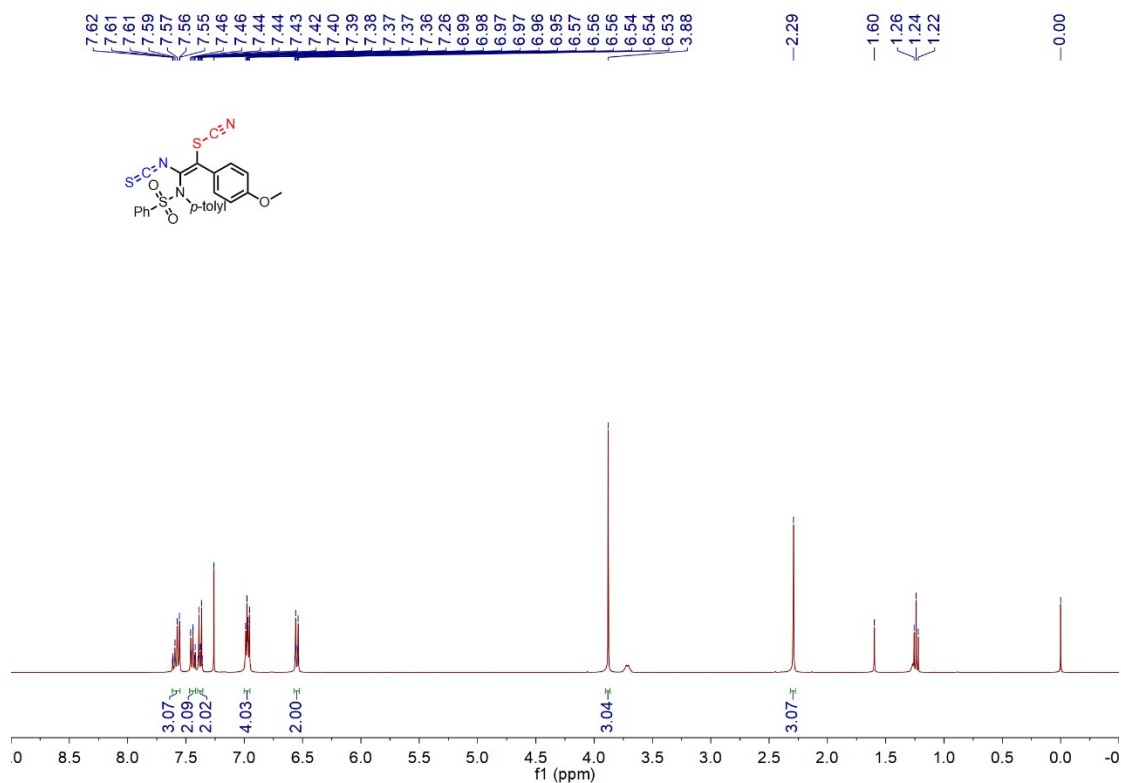

**<sup>1</sup>H NMR Spectrum of Compound 5b (400 MHz, CDCl<sub>3</sub>)**

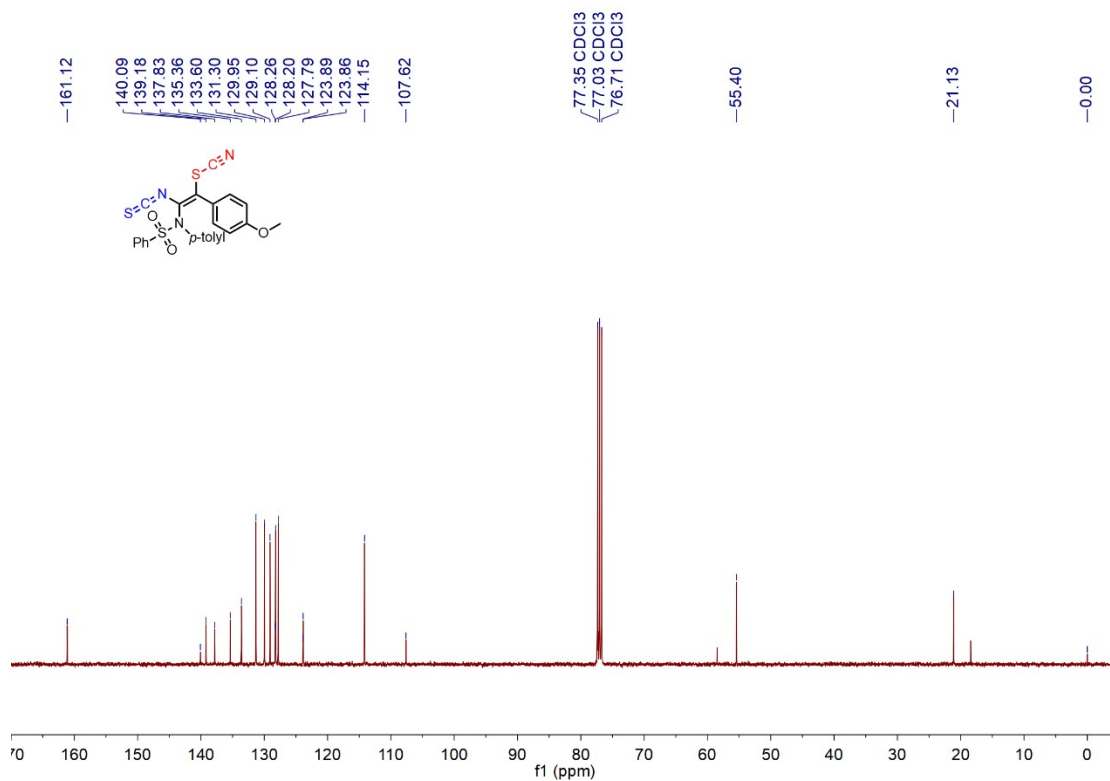

<sup>13</sup>C NMR Spectrum of Compound **5b** (100 MHz, CDCl<sub>3</sub>)

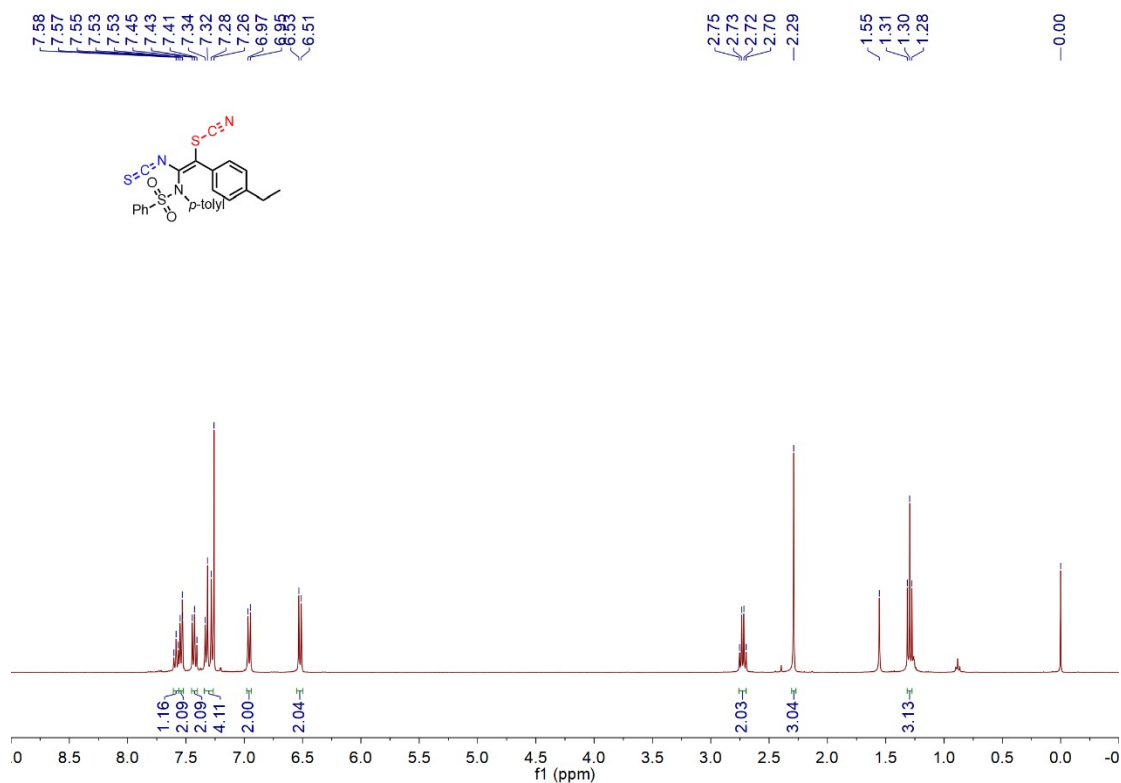

<sup>1</sup>H NMR Spectrum of Compound **5c** (400 MHz, CDCl<sub>3</sub>)



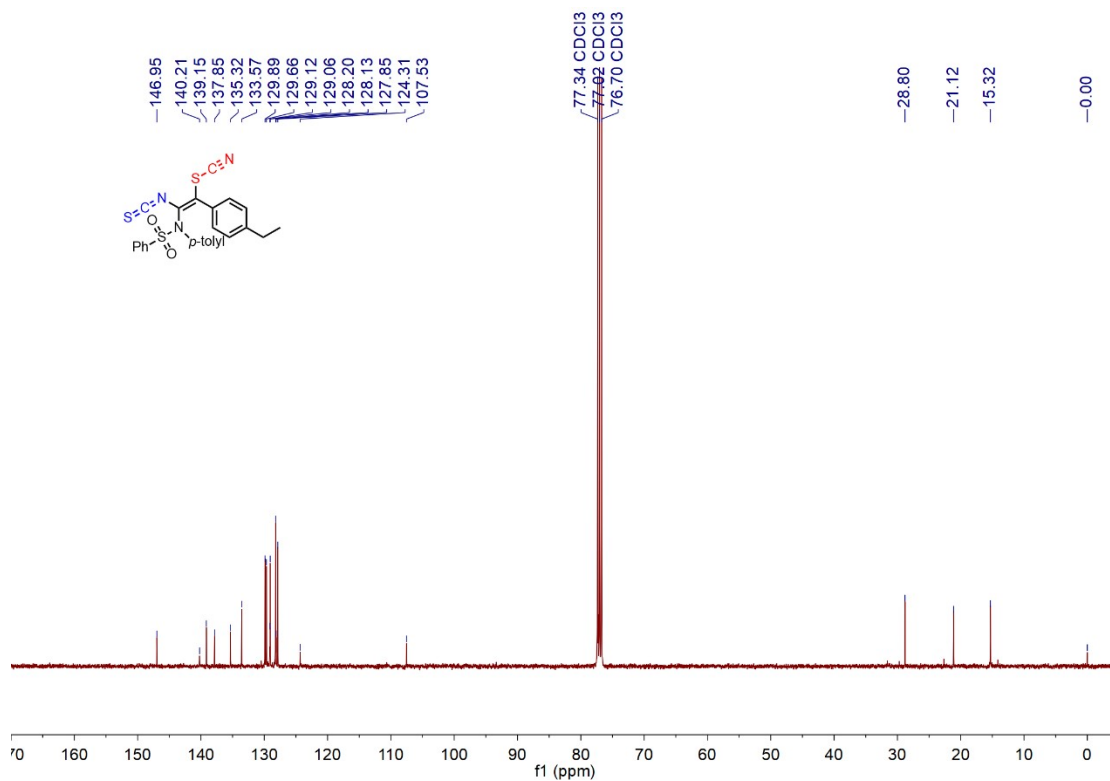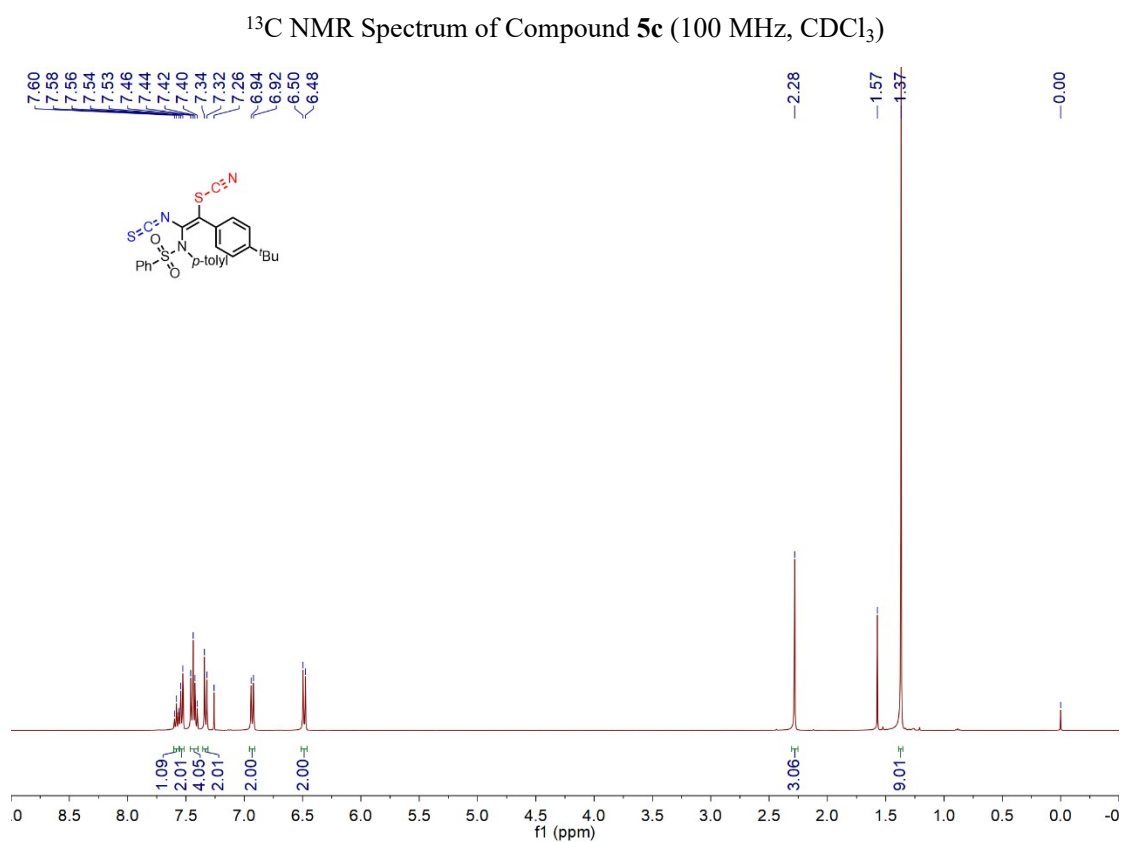

**<sup>1</sup>H NMR Spectrum of Compound 5d (400 MHz, CDCl<sub>3</sub>)**

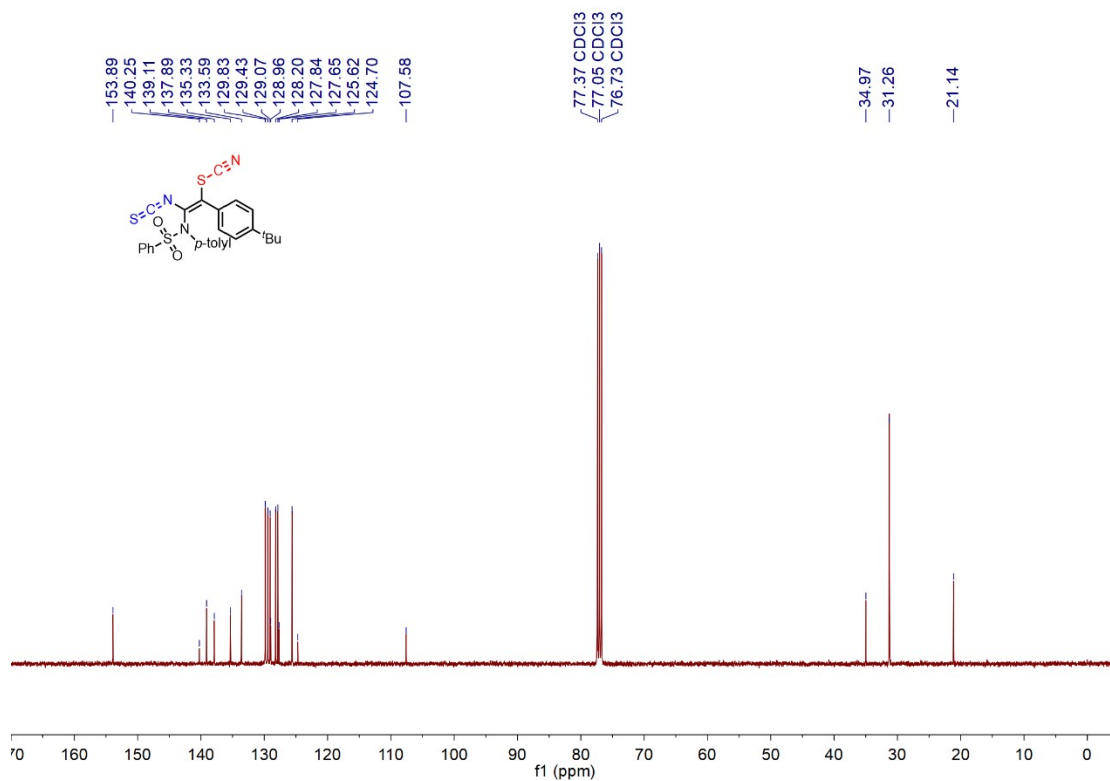

<sup>13</sup>C NMR Spectrum of Compound **5d** (100 MHz, CDCl<sub>3</sub>)

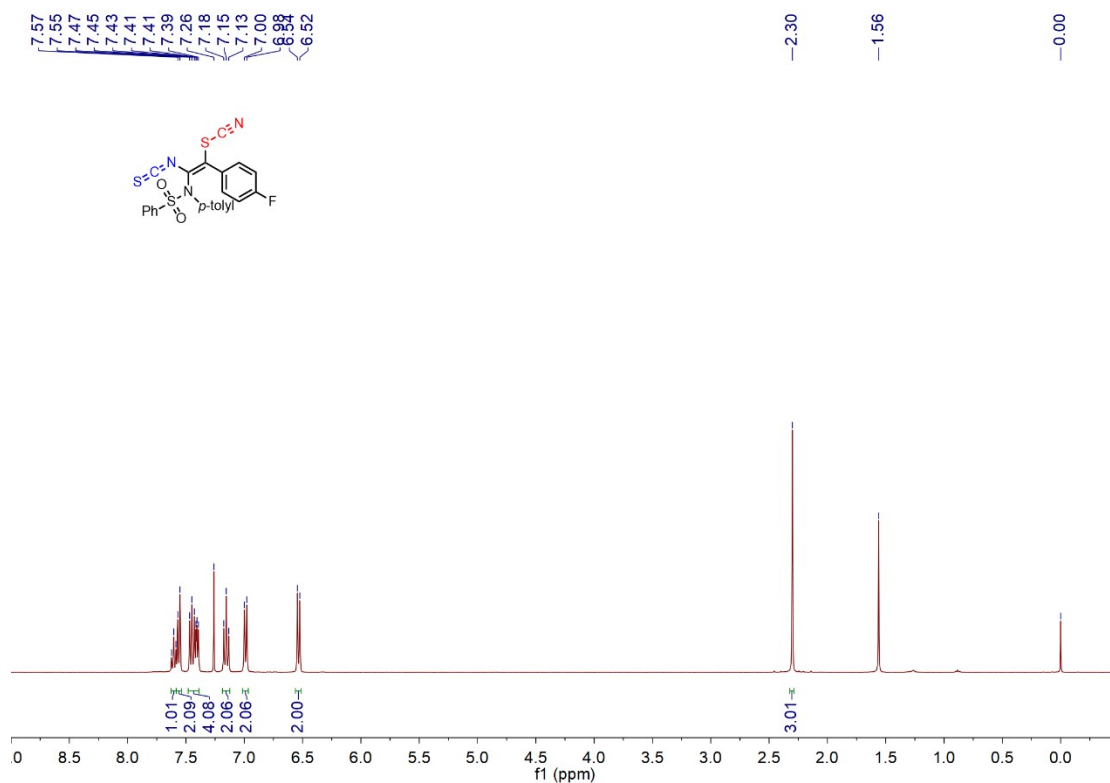

<sup>1</sup>H NMR Spectrum of Compound **5e** (400 MHz, CDCl<sub>3</sub>)

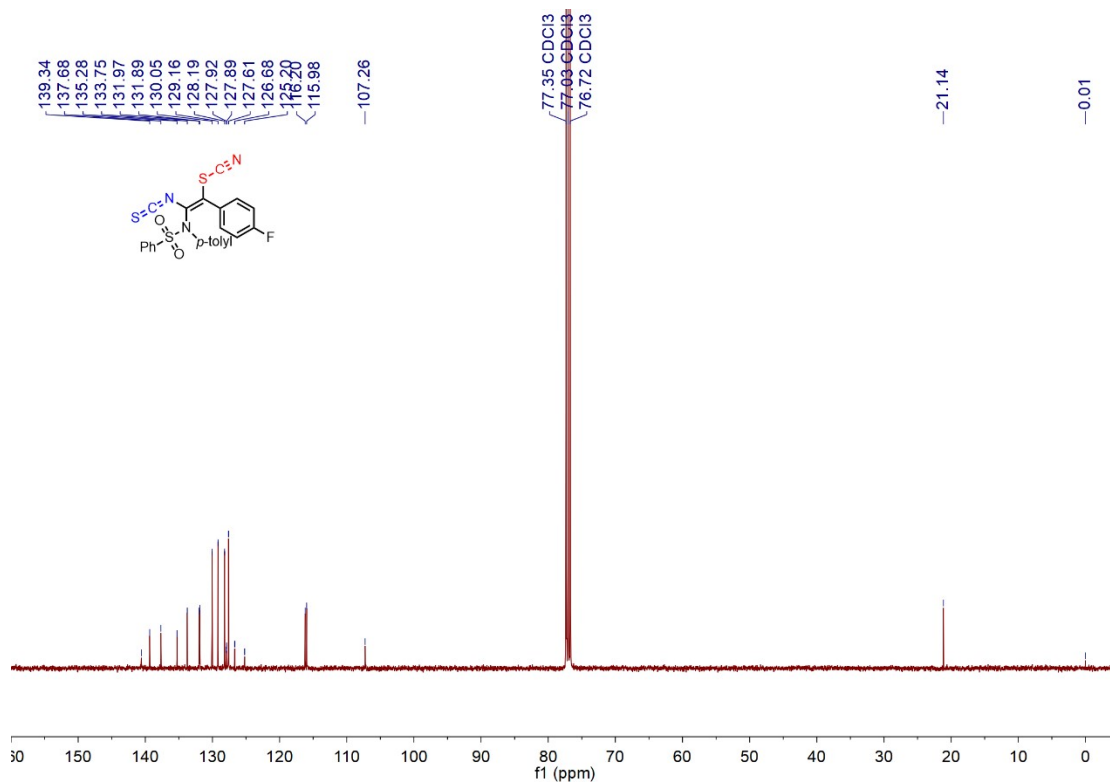

<sup>13</sup>C NMR Spectrum of Compound 5e (100 MHz, CDCl<sub>3</sub>)

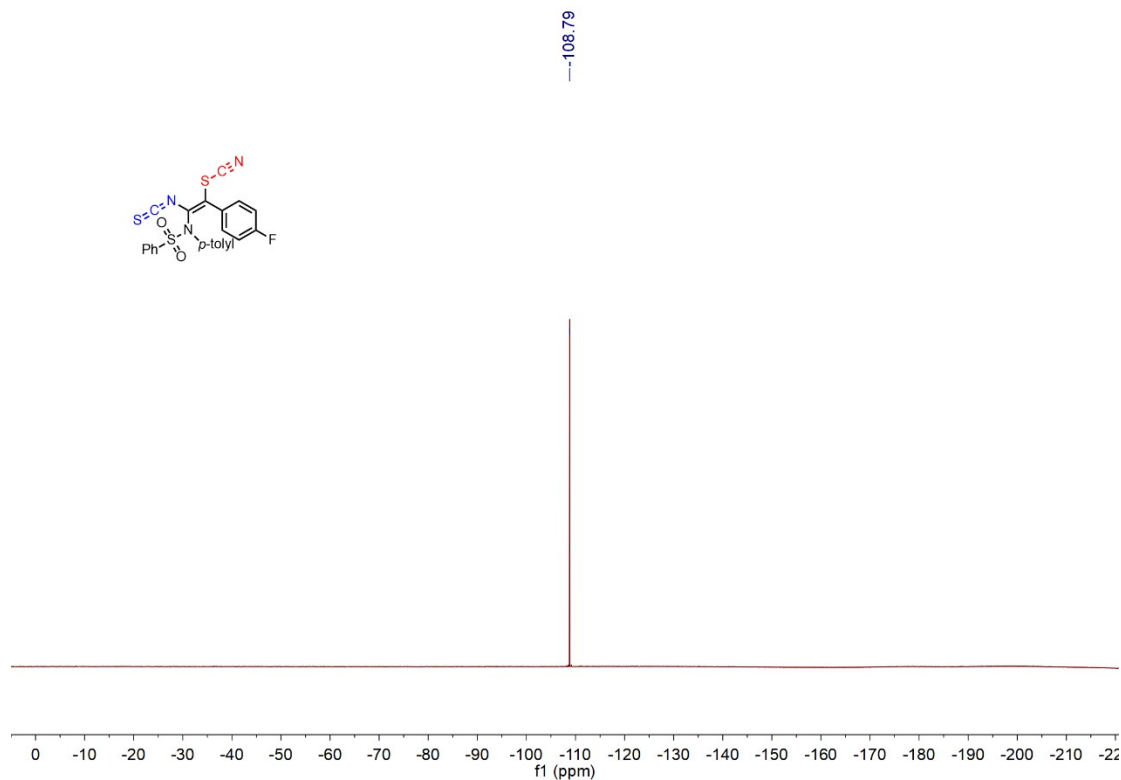

<sup>19</sup>F NMR Spectrum of Compound 5e (376 MHz, CDCl<sub>3</sub>)

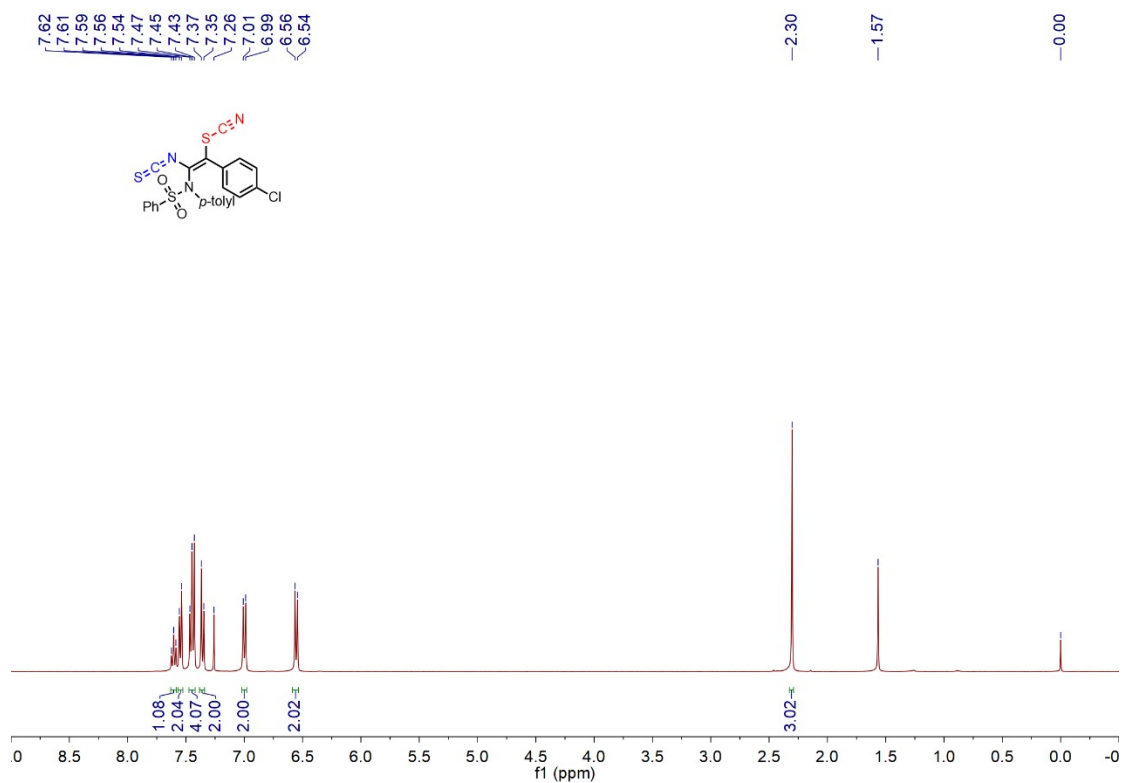

**<sup>1</sup>H NMR Spectrum of Compound 5f (400 MHz, CDCl<sub>3</sub>)**

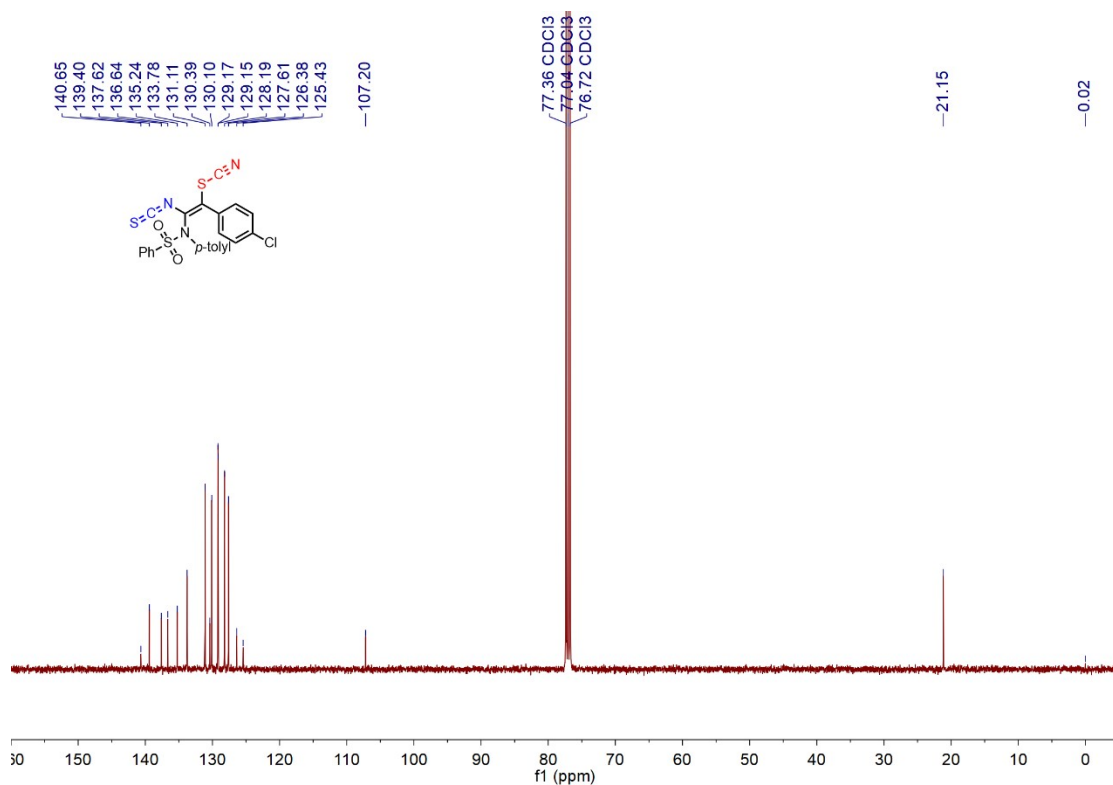

**<sup>13</sup>C NMR Spectrum of Compound 5f (100 MHz, CDCl<sub>3</sub>)**

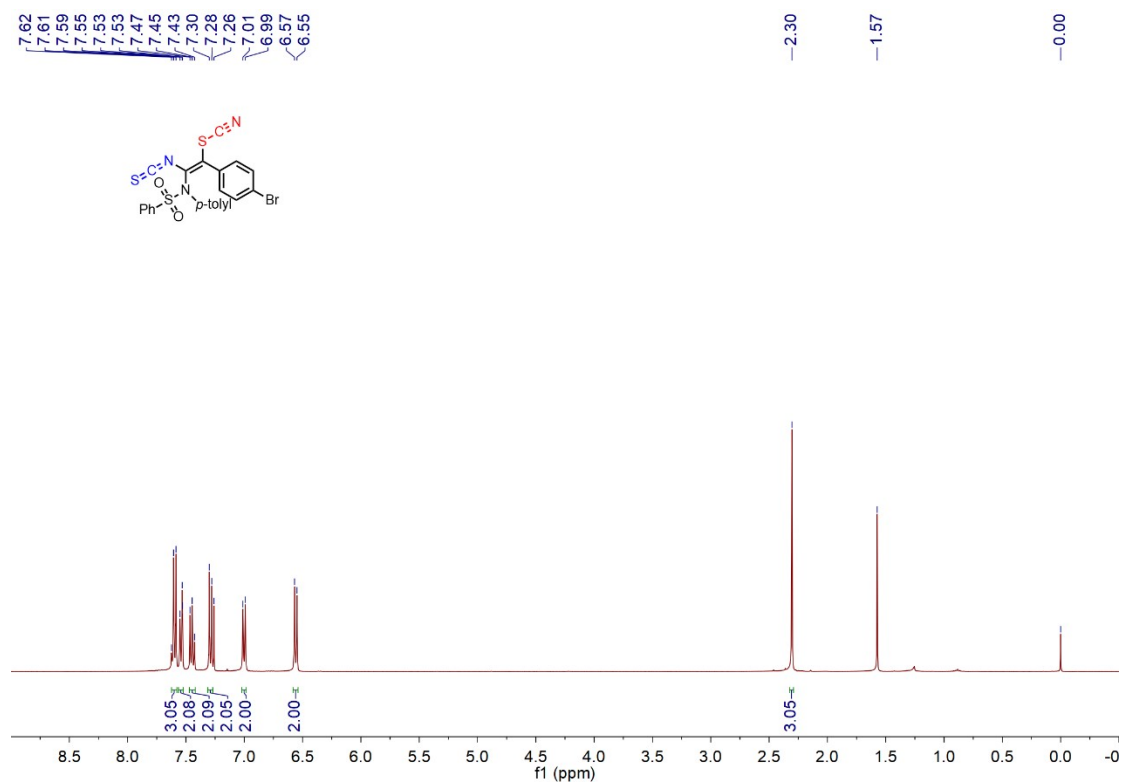

<sup>1</sup>H NMR Spectrum of Compound **5g** (400 MHz, CDCl<sub>3</sub>)

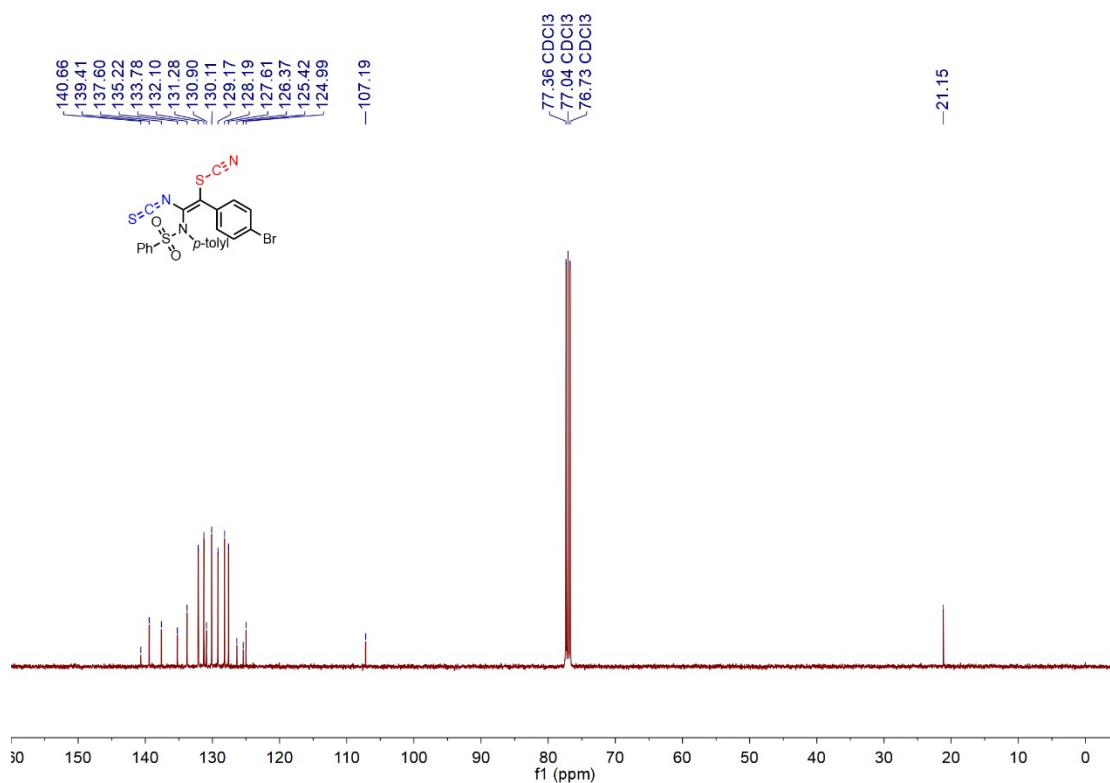

<sup>13</sup>C NMR Spectrum of Compound **5g** (100 MHz, CDCl<sub>3</sub>)

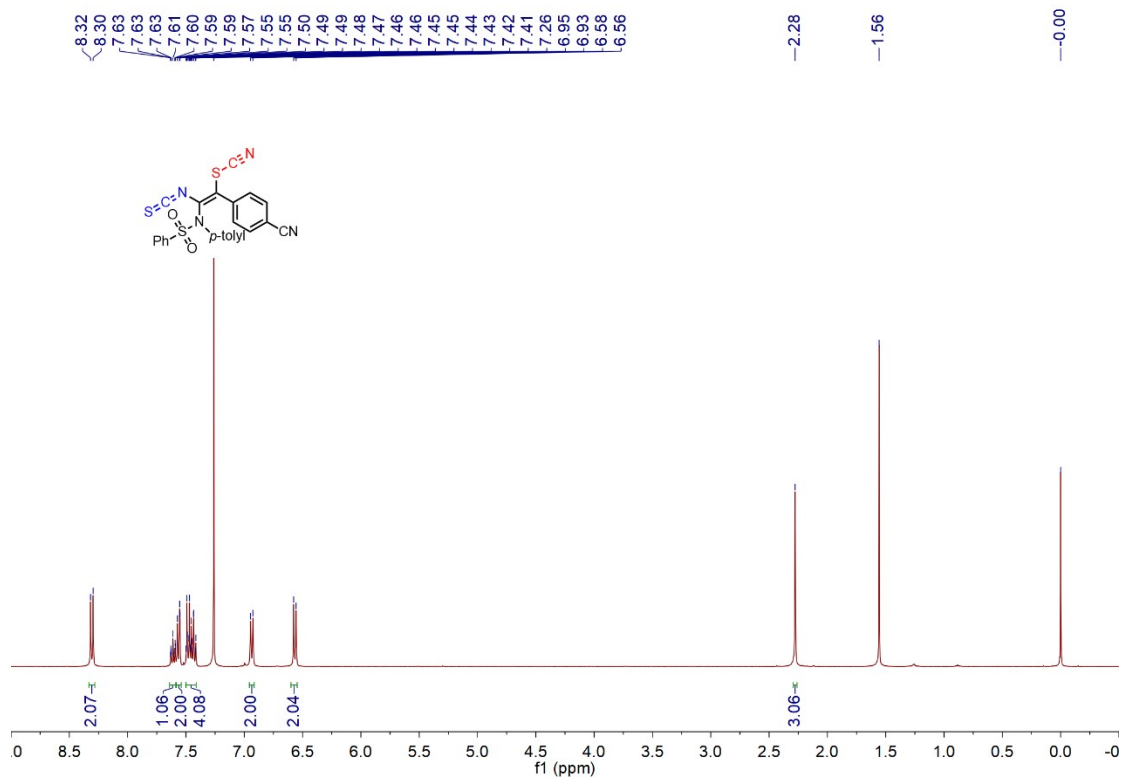

**<sup>1</sup>H NMR Spectrum of Compound **5h** (400 MHz, CDCl<sub>3</sub>)**

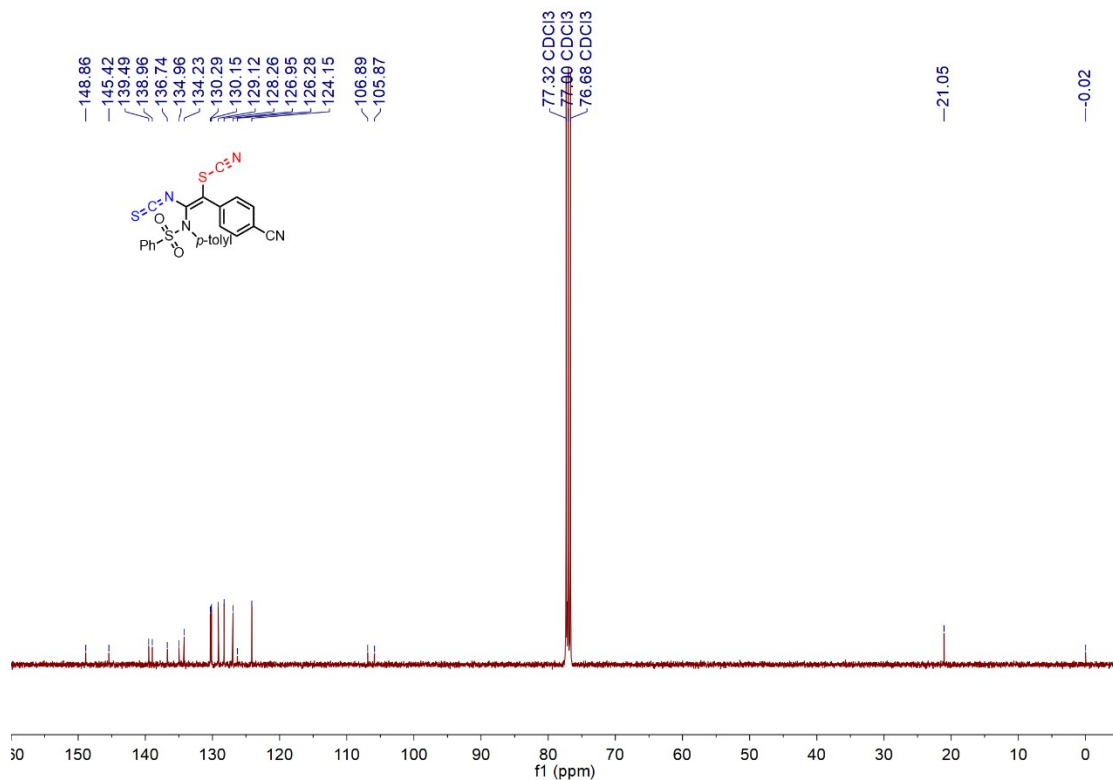

**<sup>13</sup>C NMR Spectrum of Compound **5h** (100 MHz, CDCl<sub>3</sub>)**

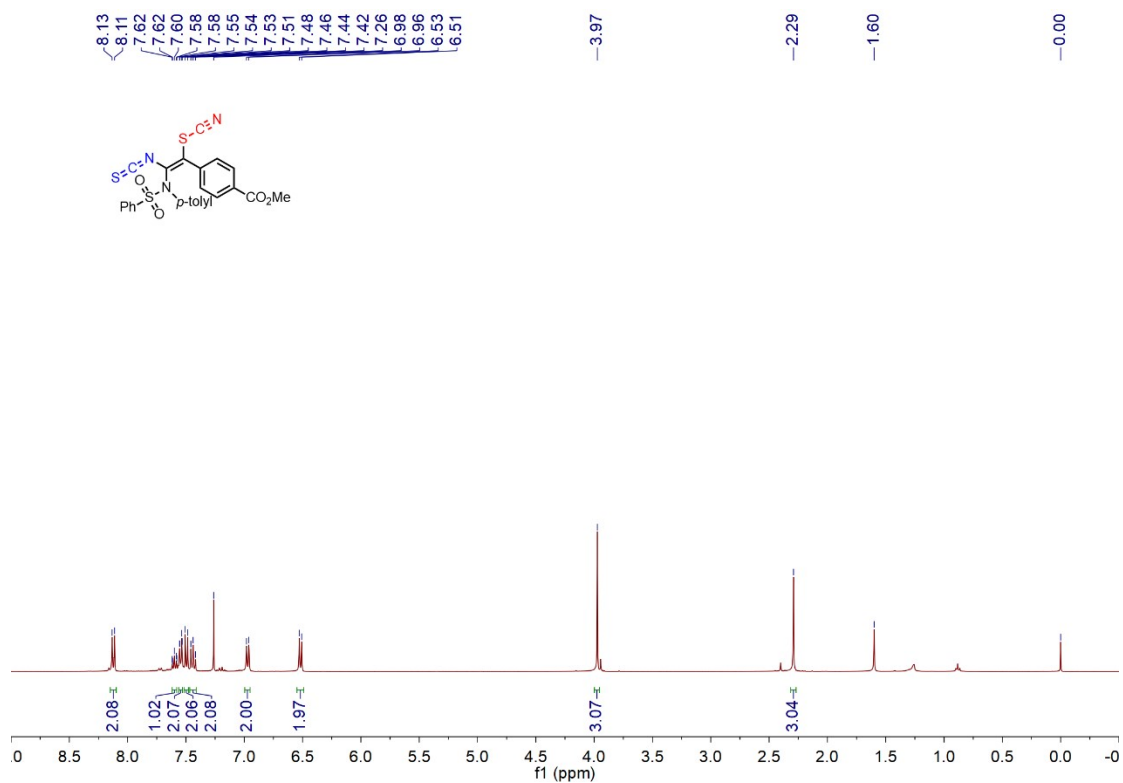

**<sup>1</sup>H NMR Spectrum of Compound **5i** (400 MHz, CDCl<sub>3</sub>)**

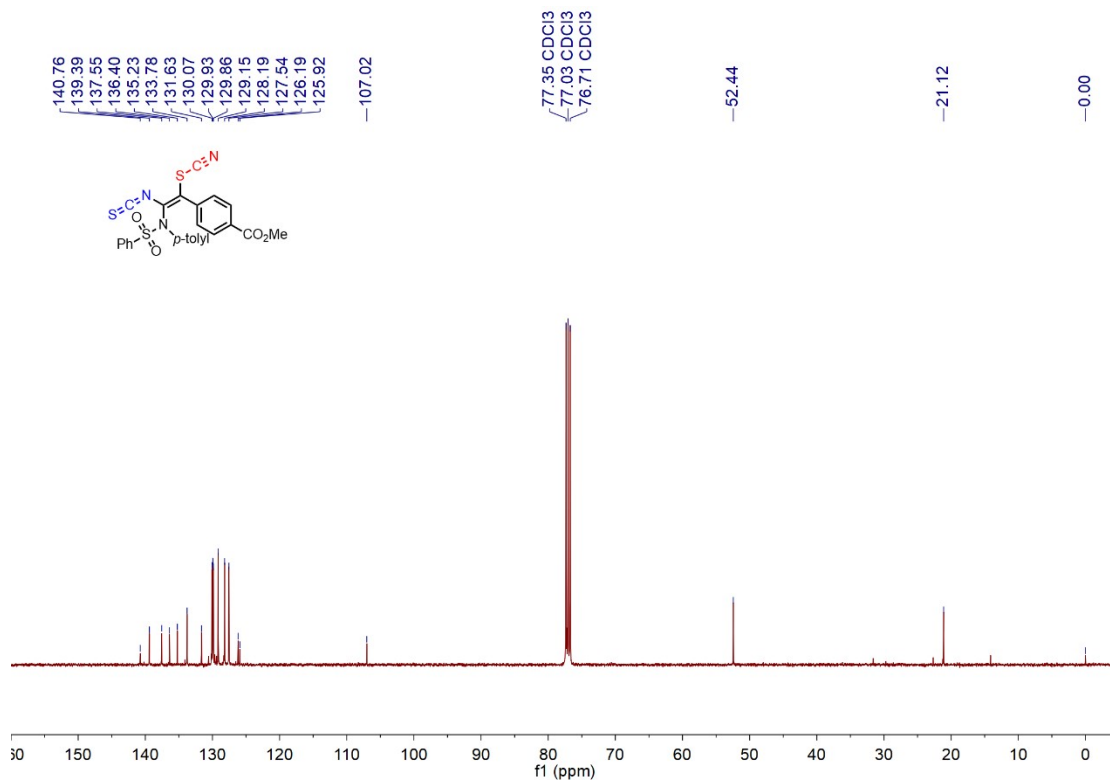

**<sup>13</sup>C NMR Spectrum of Compound **5i** (100 MHz, CDCl<sub>3</sub>)**

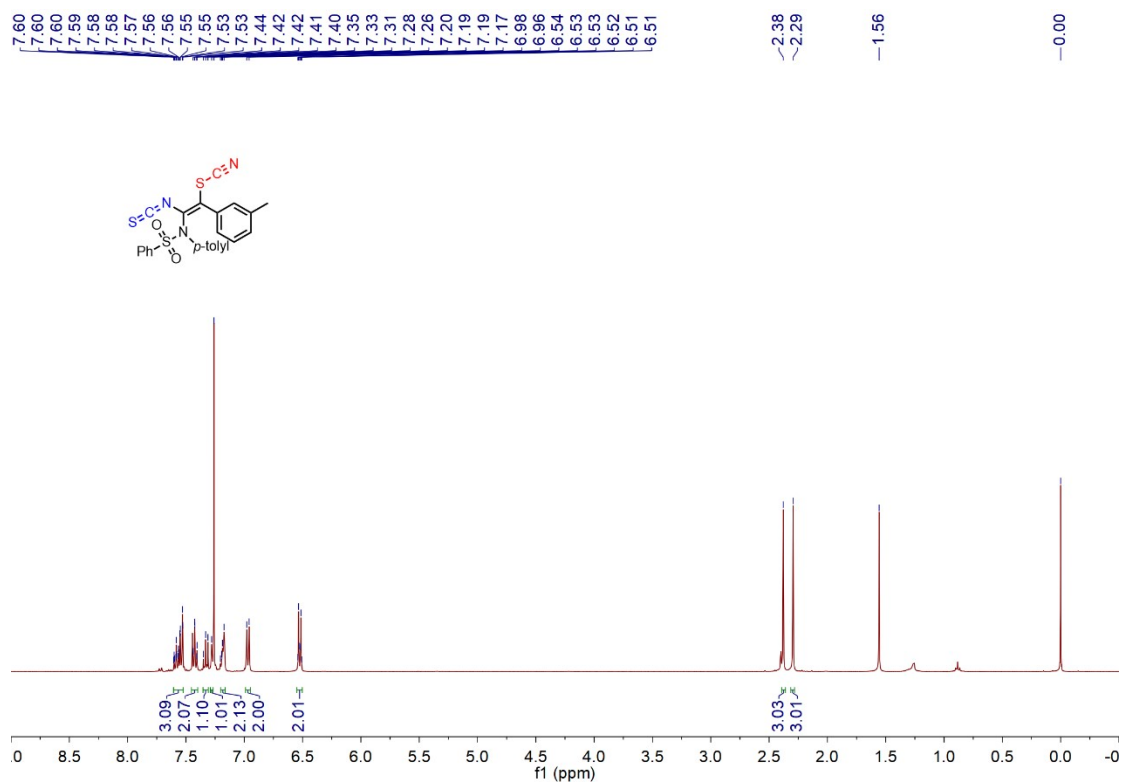

**<sup>1</sup>H NMR Spectrum of Compound **5j** (400 MHz, CDCl<sub>3</sub>)**

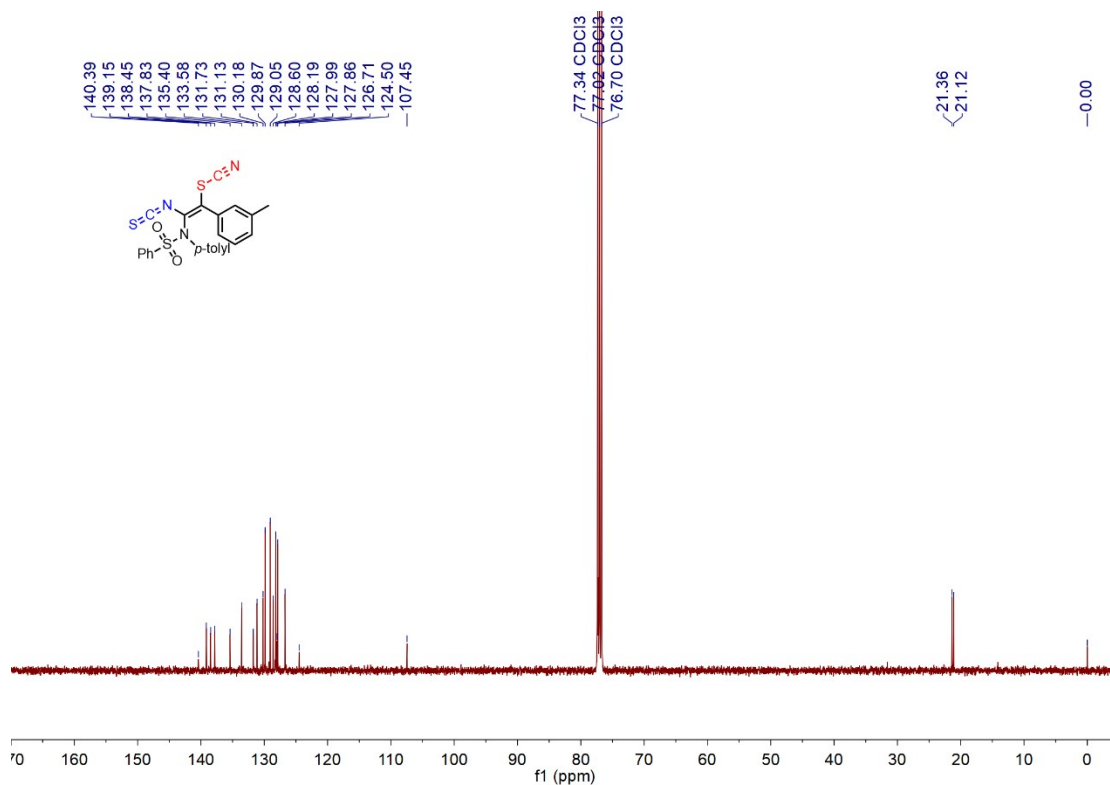

**<sup>13</sup>C NMR Spectrum of Compound **5j** (100 MHz, CDCl<sub>3</sub>)**



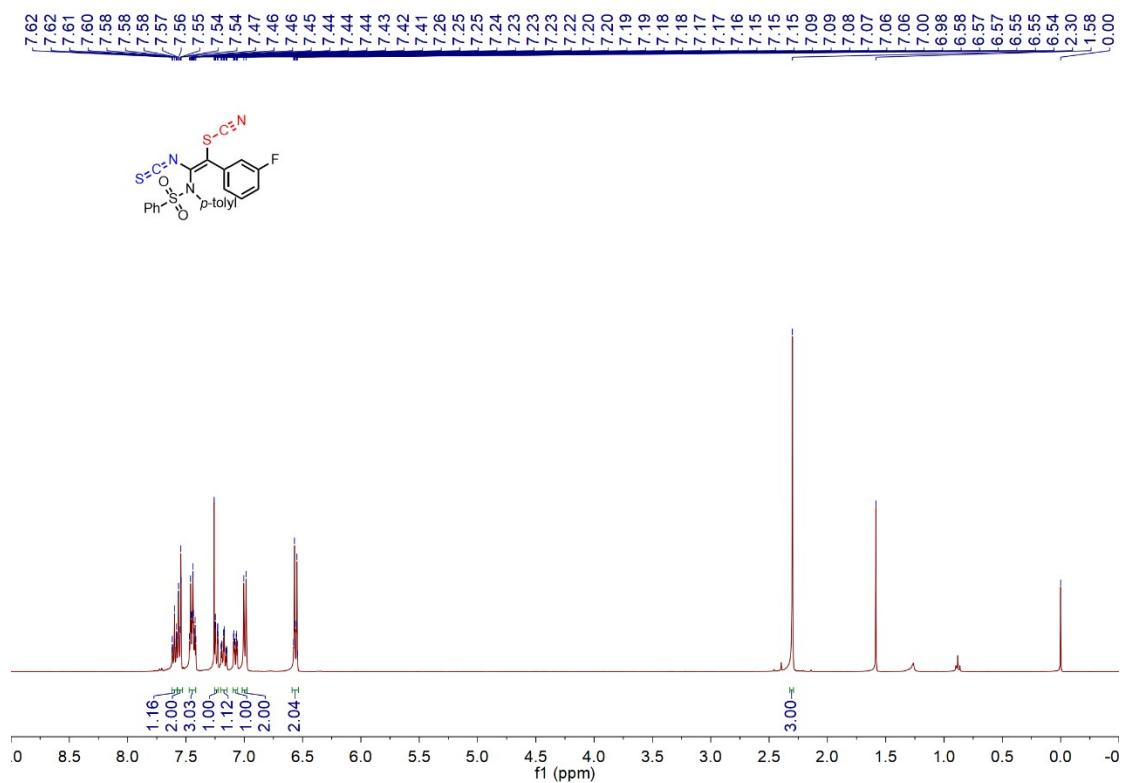

<sup>1</sup>H NMR Spectrum of Compound **5k** (400 MHz, CDCl<sub>3</sub>)

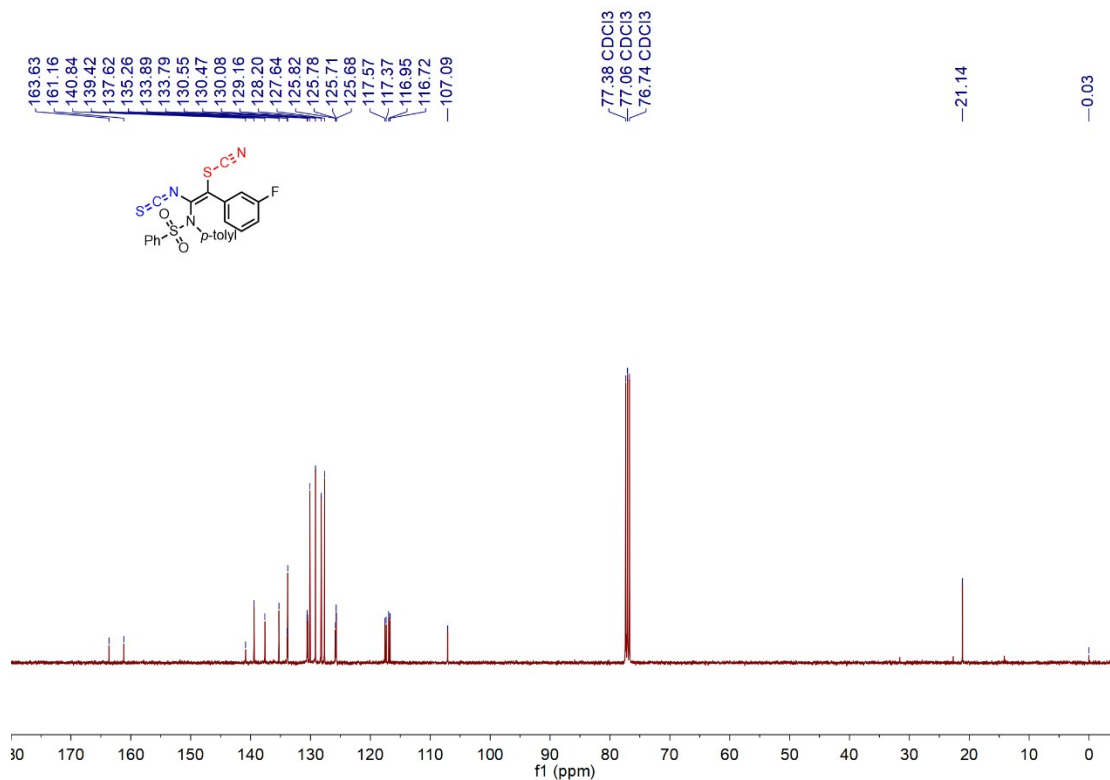

<sup>13</sup>C NMR Spectrum of Compound **5k** (100 MHz, CDCl<sub>3</sub>)

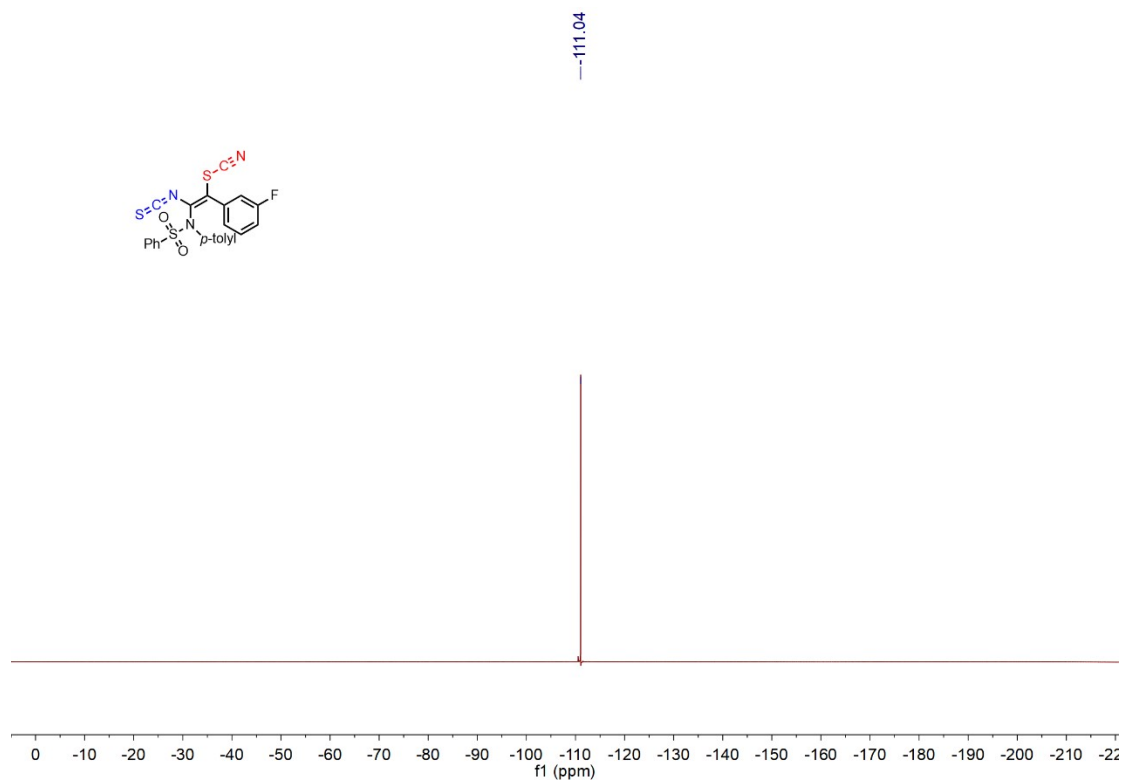

<sup>19</sup>F NMR Spectrum of Compound **5k** (376 MHz, CDCl<sub>3</sub>)

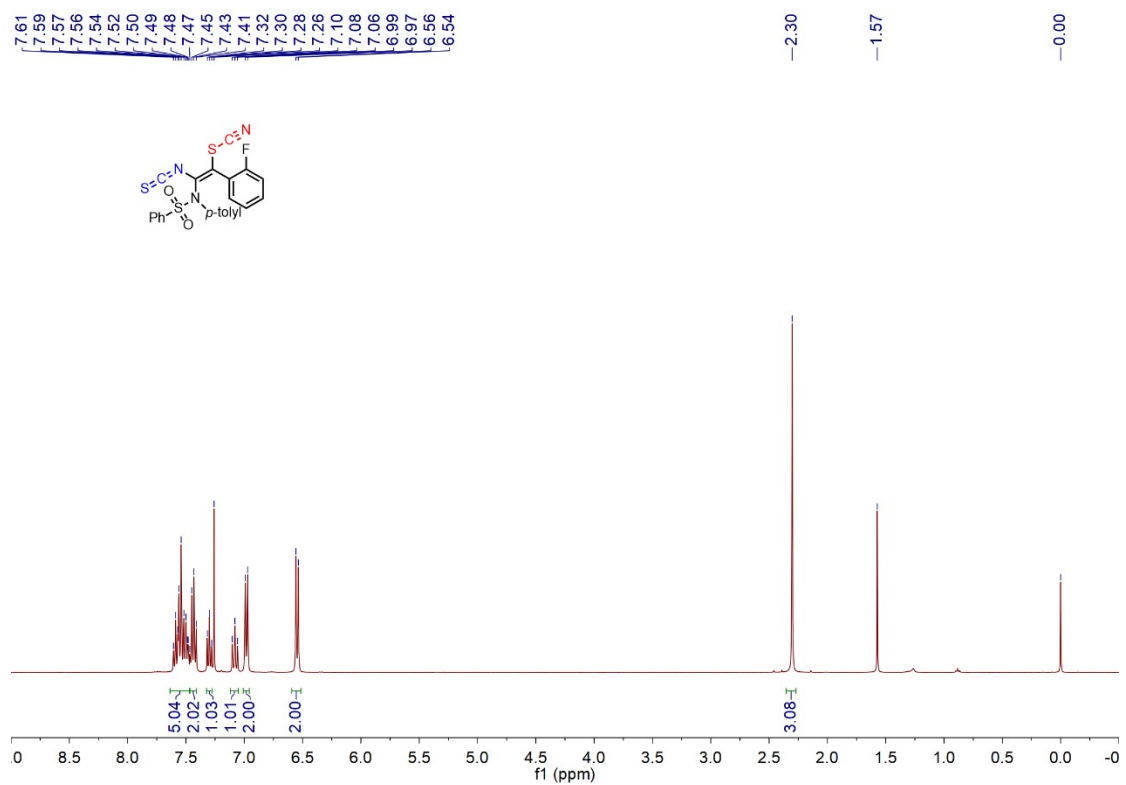

<sup>1</sup>H NMR Spectrum of Compound **5l** (400 MHz, CDCl<sub>3</sub>)

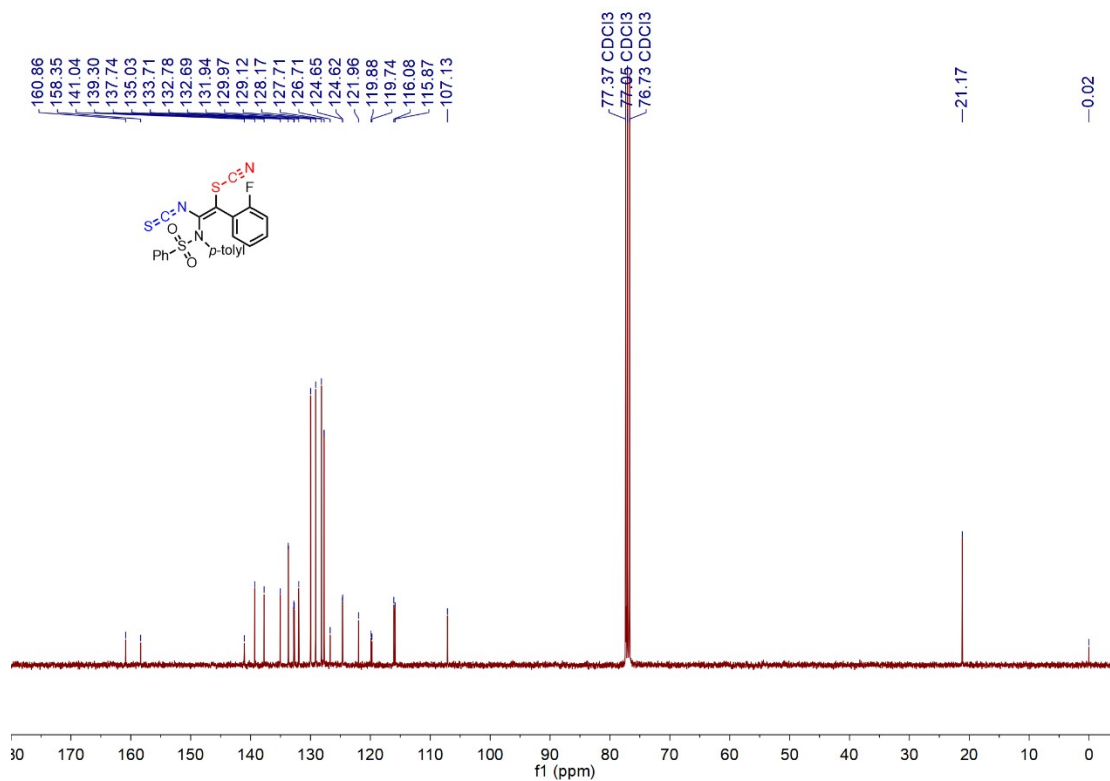

<sup>13</sup>C NMR Spectrum of Compound **51** (100 MHz, CDCl<sub>3</sub>)

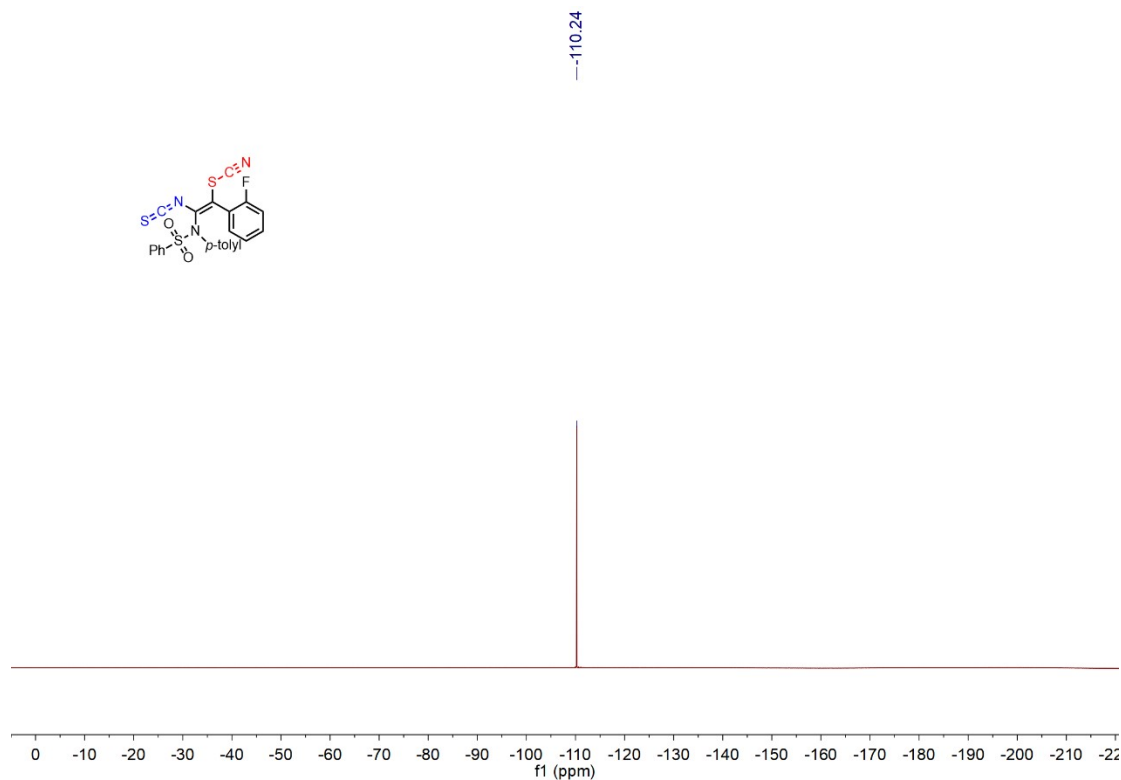

<sup>19</sup>F NMR Spectrum of Compound **51** (376 MHz, CDCl<sub>3</sub>)

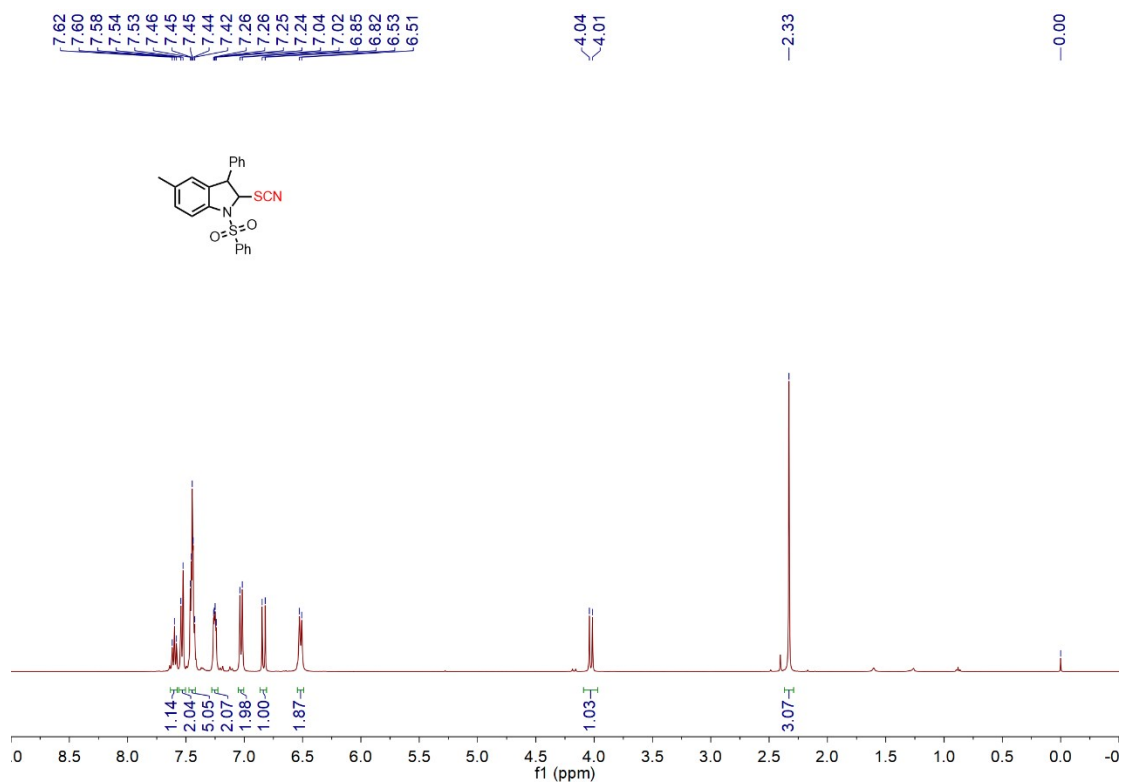

**<sup>1</sup>H NMR Spectrum of Compound 7a (400 MHz, CDCl<sub>3</sub>)**

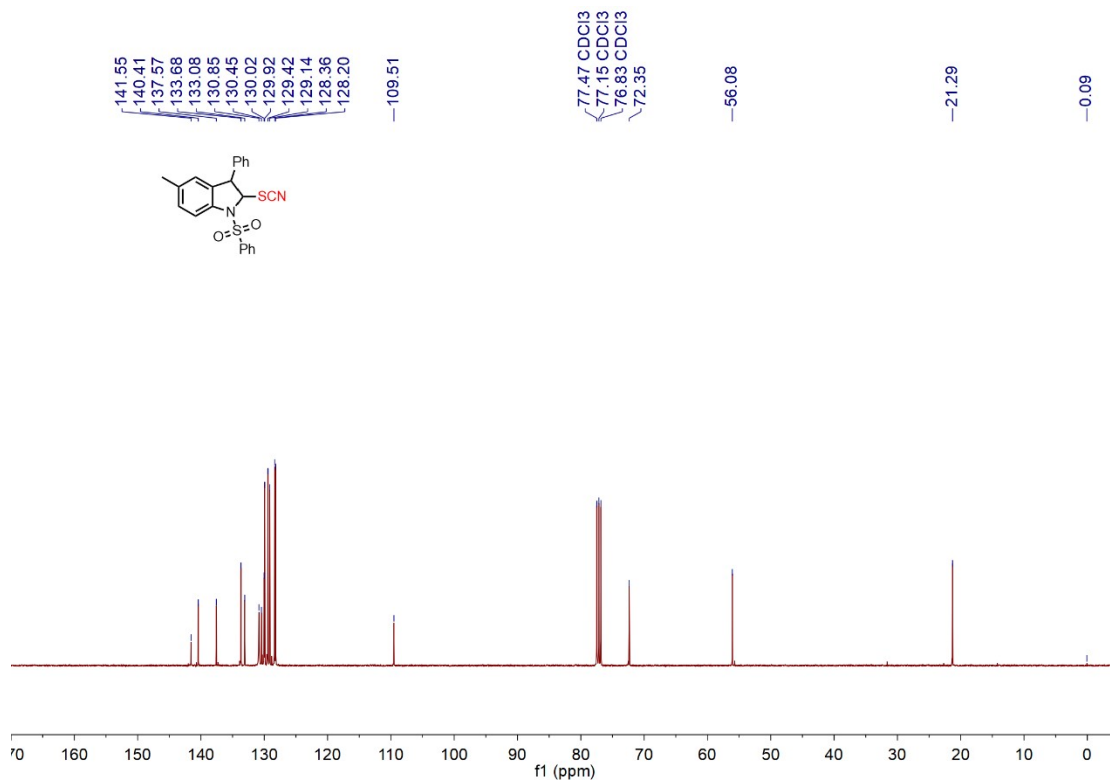

**<sup>13</sup>C NMR Spectrum of Compound 7a (100 MHz, CDCl<sub>3</sub>)**

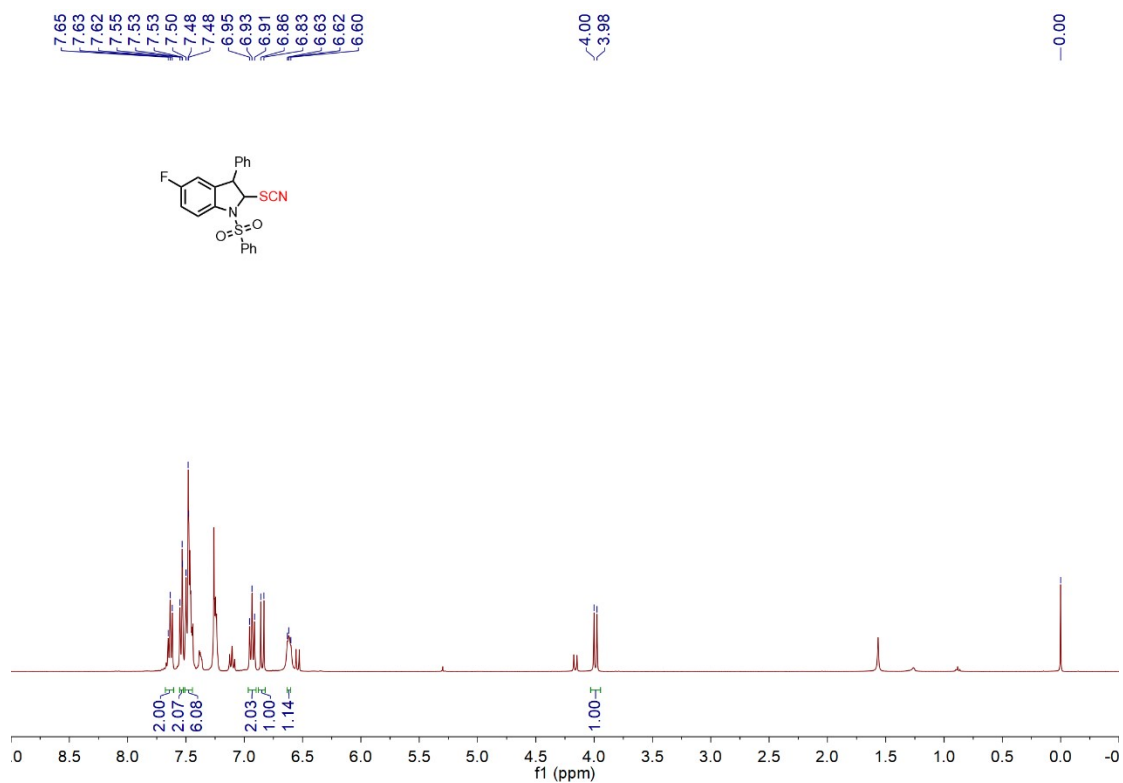

<sup>1</sup>H NMR Spectrum of Compound **7b** (400 MHz, CDCl<sub>3</sub>)

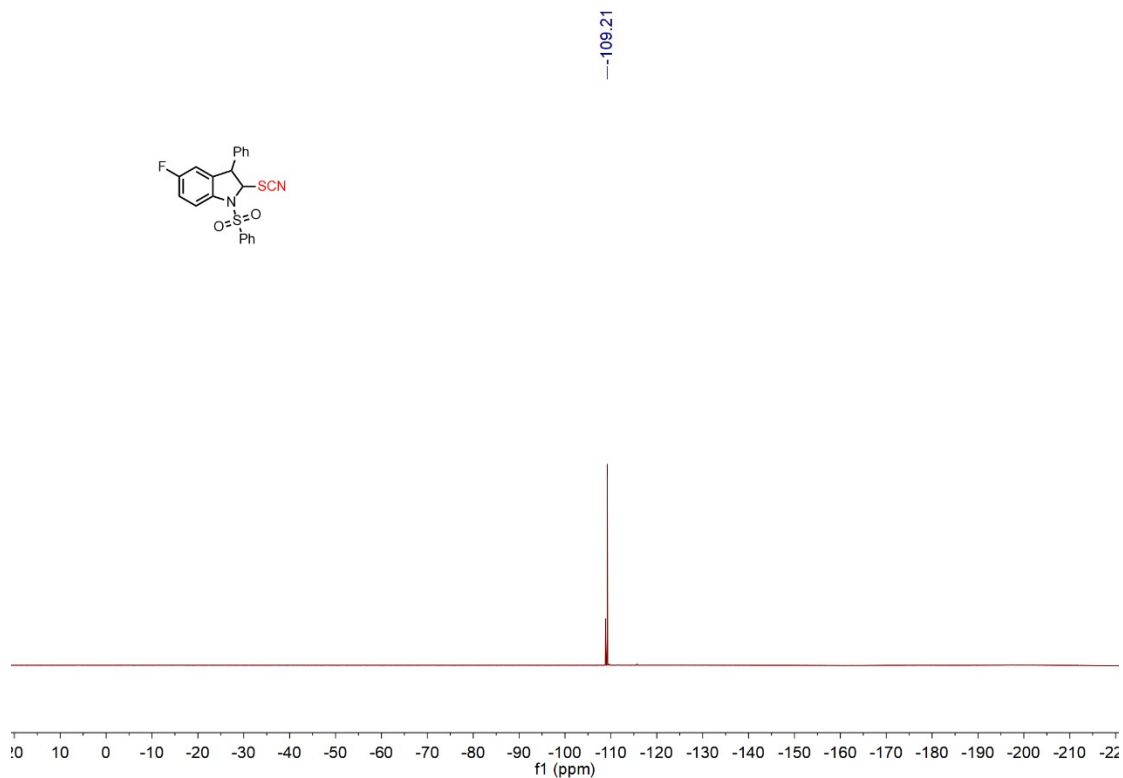

<sup>19</sup>F NMR Spectrum of Compound **7b** (376 MHz, CDCl<sub>3</sub>)

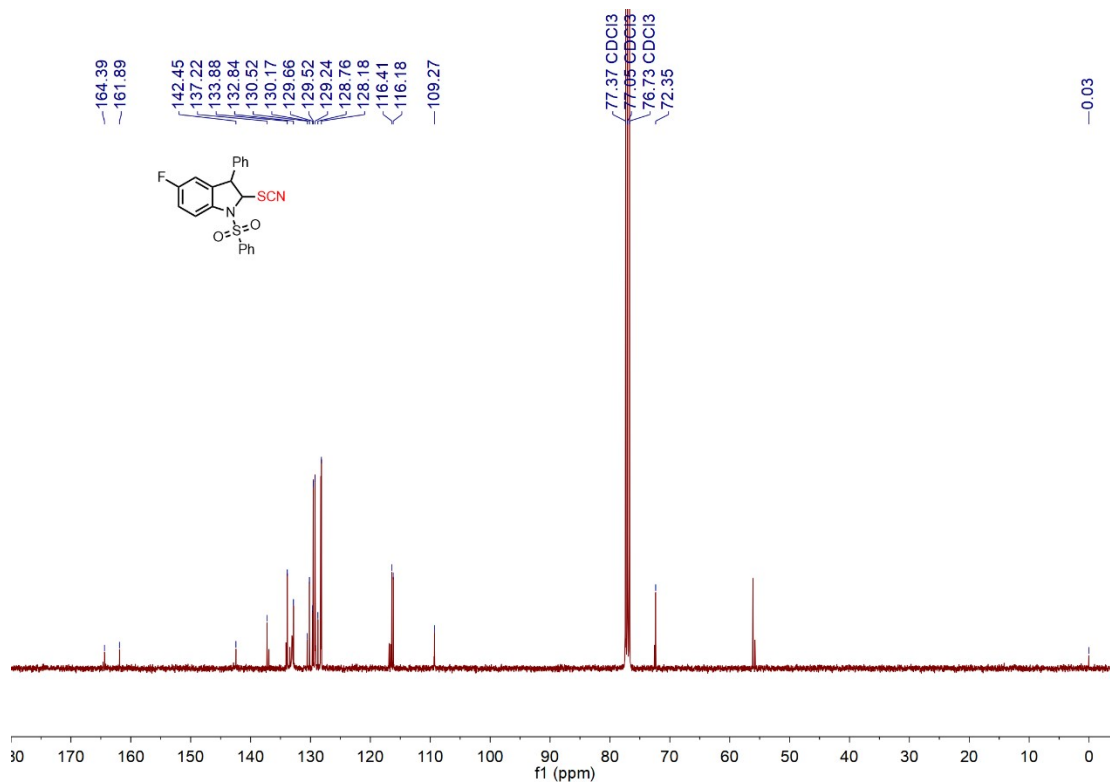

<sup>13</sup>C NMR Spectrum of Compound 7b (100 MHz, CDCl<sub>3</sub>)

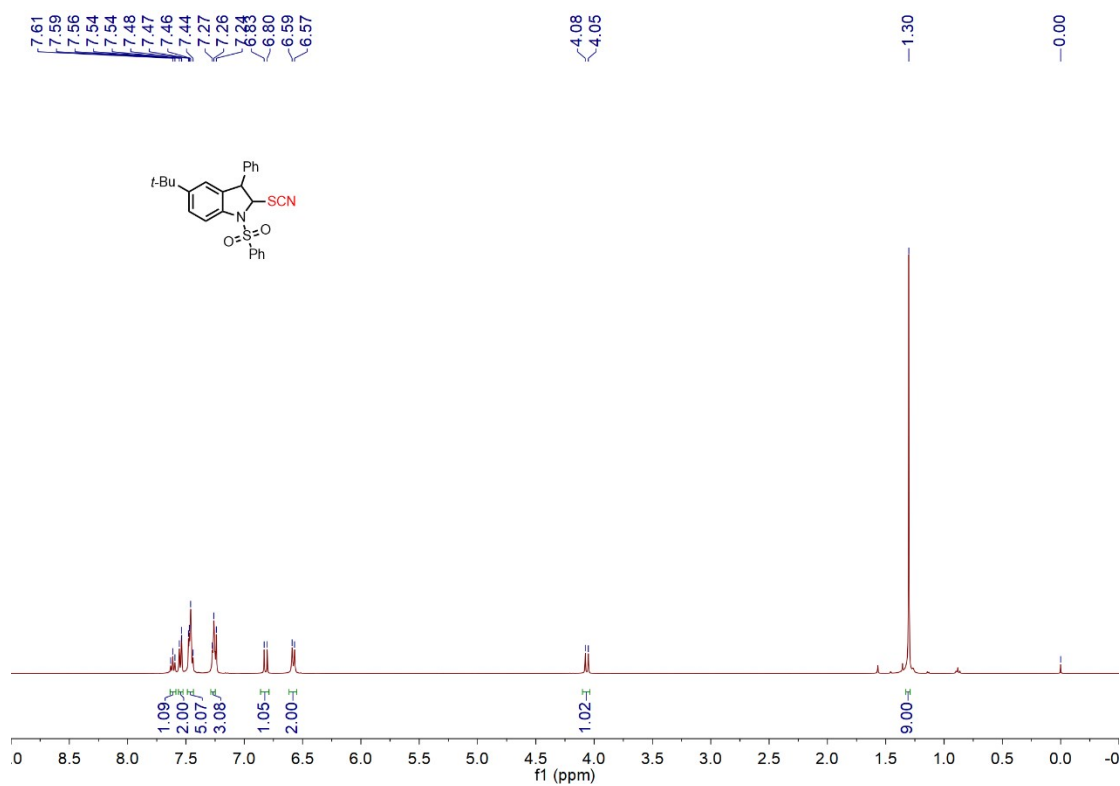

<sup>1</sup>H NMR Spectrum of Compound 7c (400 MHz, CDCl<sub>3</sub>)

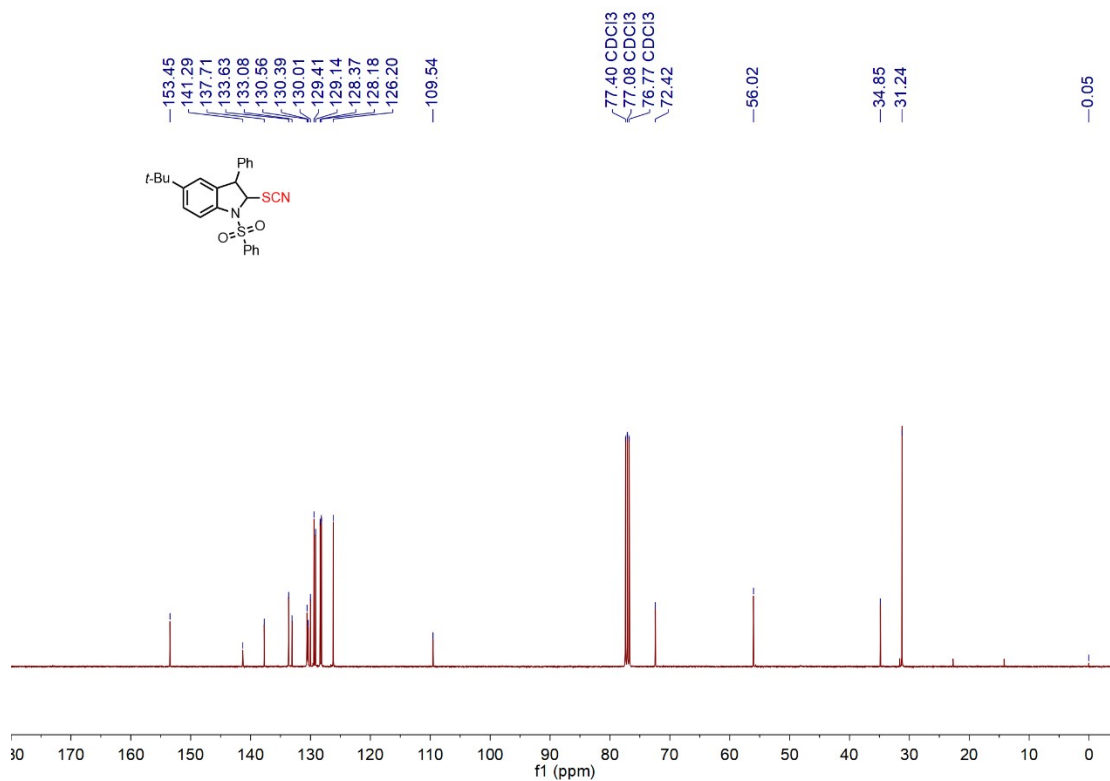

<sup>13</sup>C NMR Spectrum of Compound 7c (100 MHz, CDCl<sub>3</sub>)

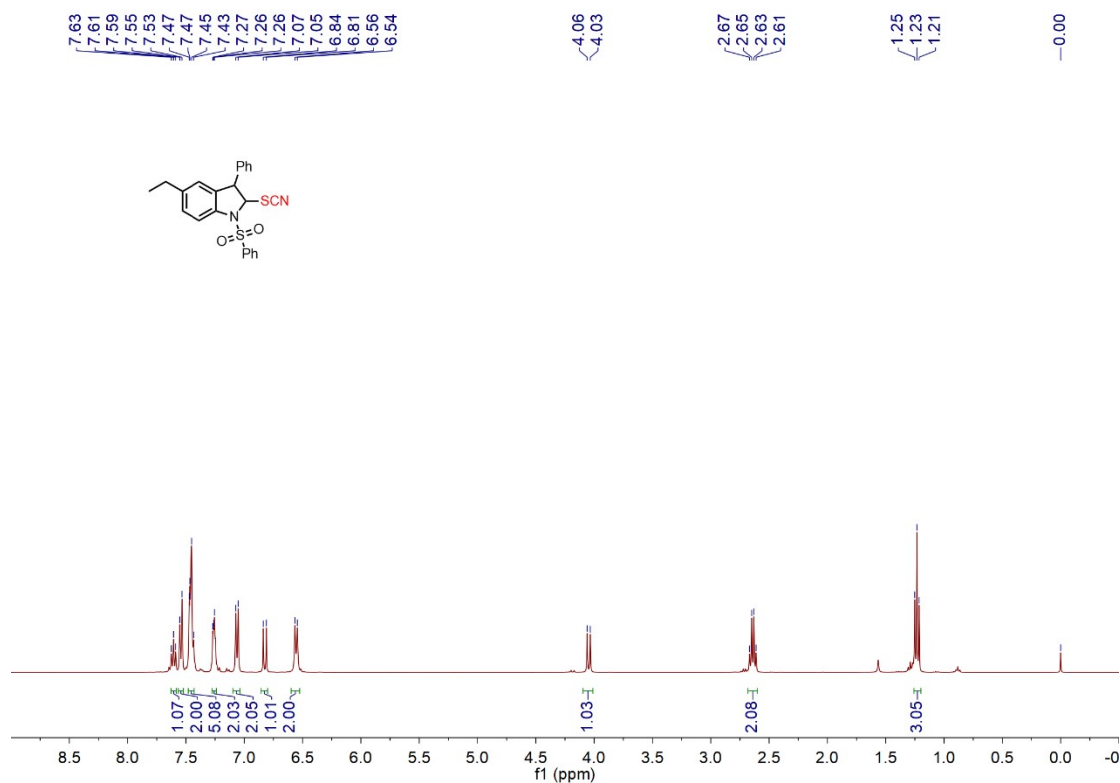

<sup>1</sup>H NMR Spectrum of Compound 7d (400 MHz, CDCl<sub>3</sub>)

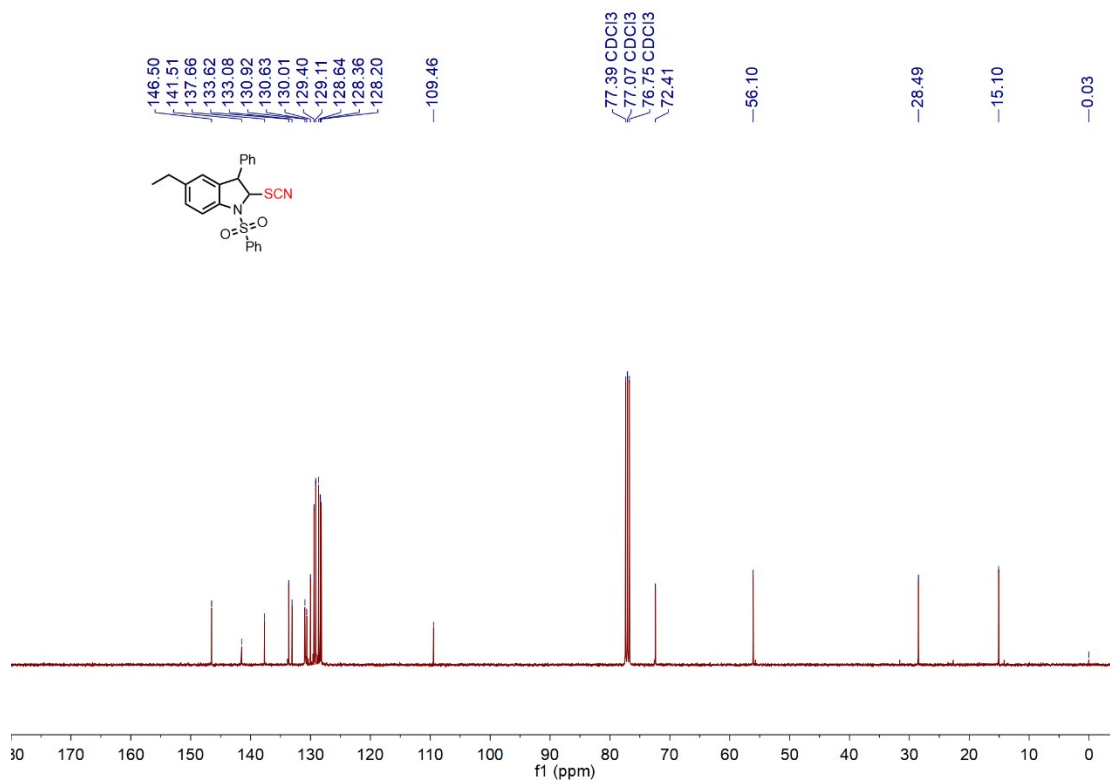

<sup>13</sup>C NMR Spectrum of Compound 7d (100 MHz, CDCl<sub>3</sub>)

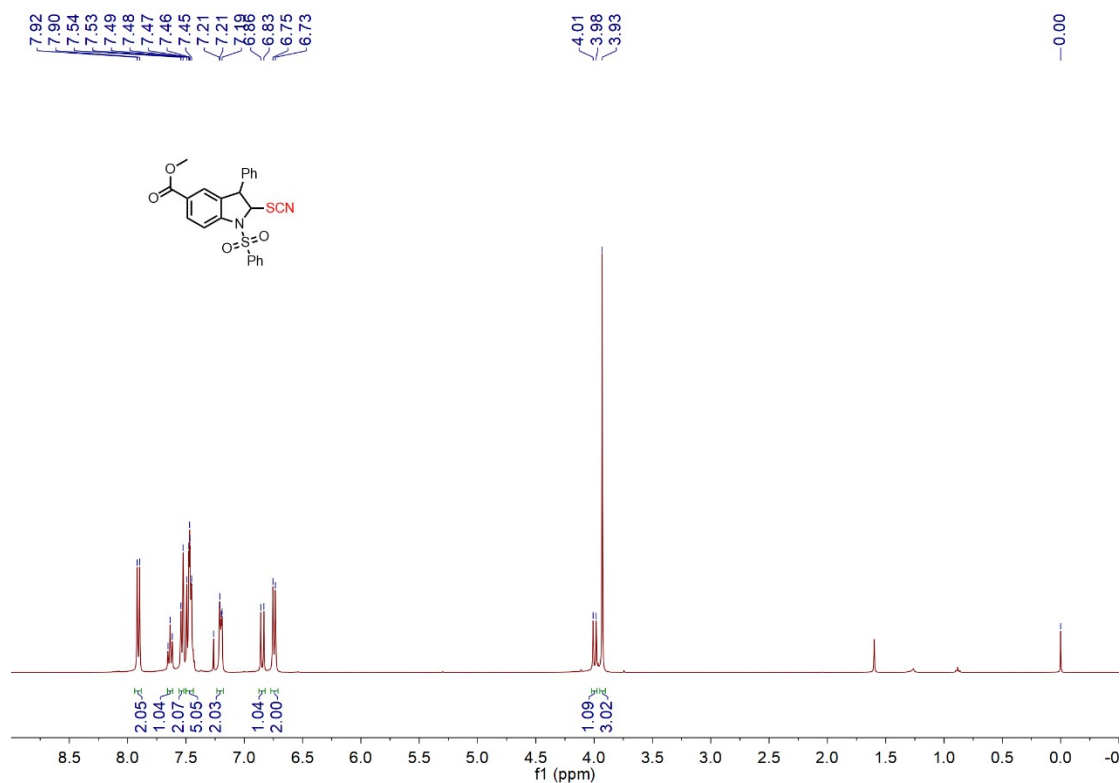

<sup>1</sup>H NMR Spectrum of Compound 7e (400 MHz, CDCl<sub>3</sub>)



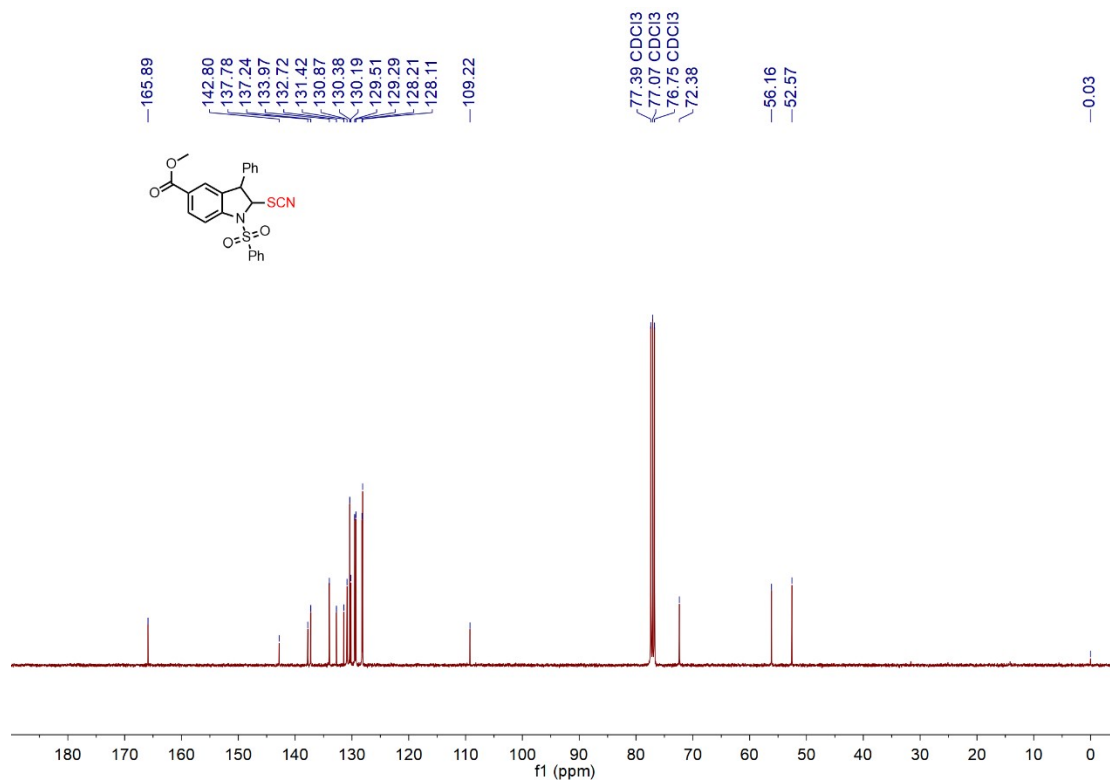

<sup>13</sup>C NMR Spectrum of Compound 7e (100 MHz, CDCl<sub>3</sub>)

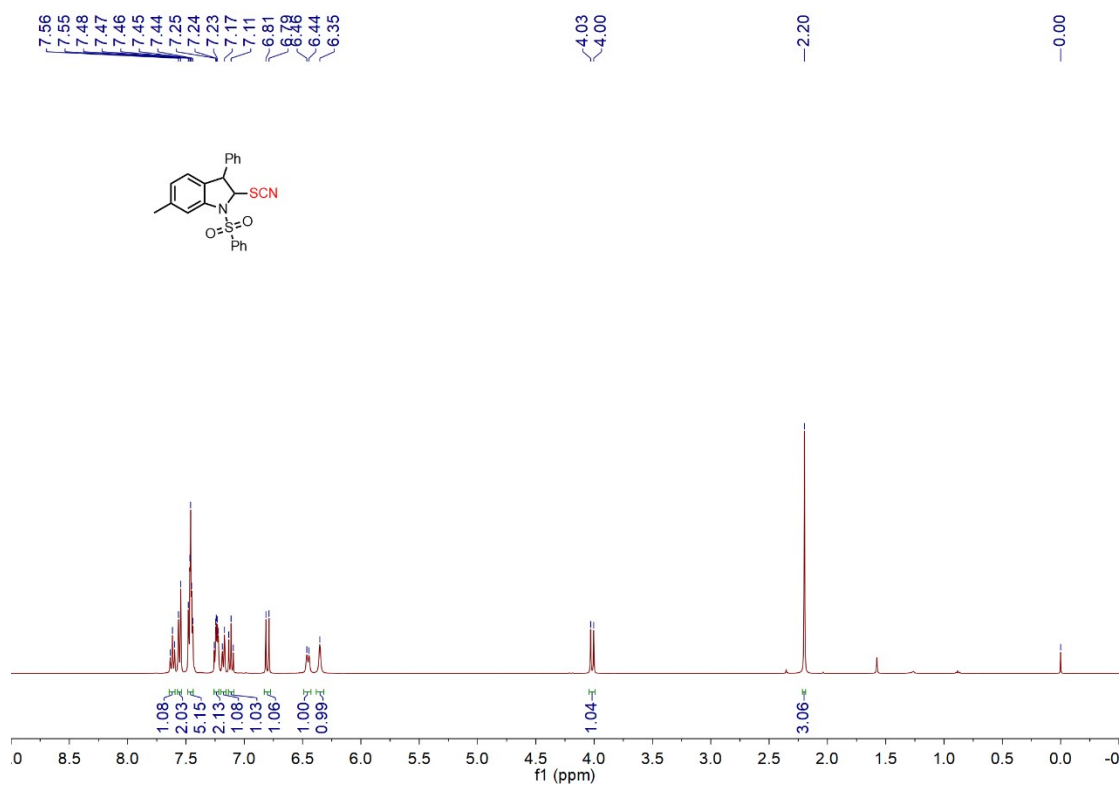

<sup>1</sup>H NMR Spectrum of Compound 7f (400 MHz, CDCl<sub>3</sub>)

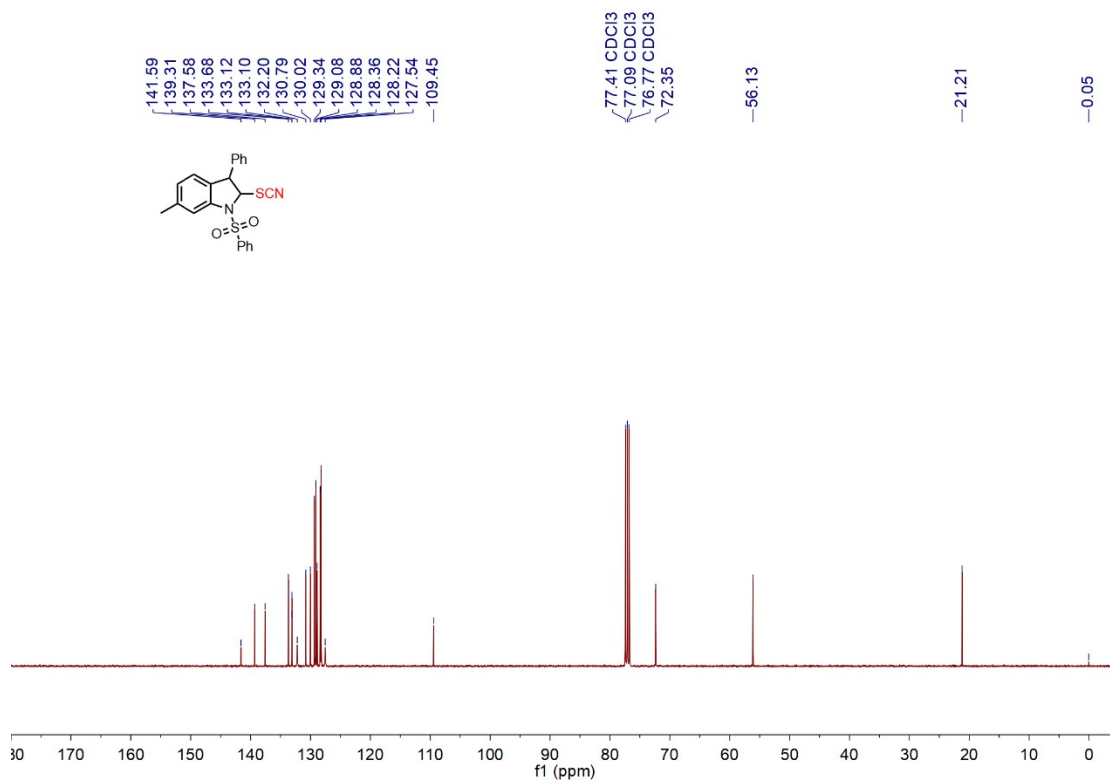

<sup>13</sup>C NMR Spectrum of Compound 7f (100 MHz, CDCl<sub>3</sub>)

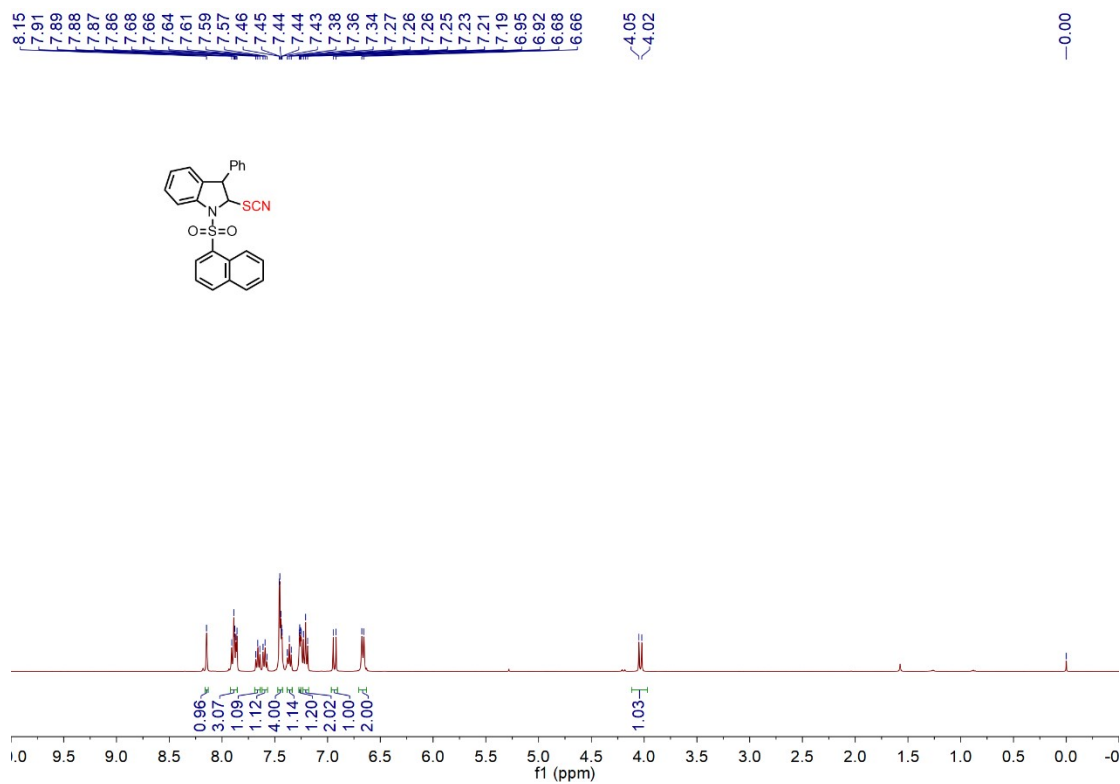

<sup>1</sup>H NMR Spectrum of Compound 7g (400 MHz, CDCl<sub>3</sub>)

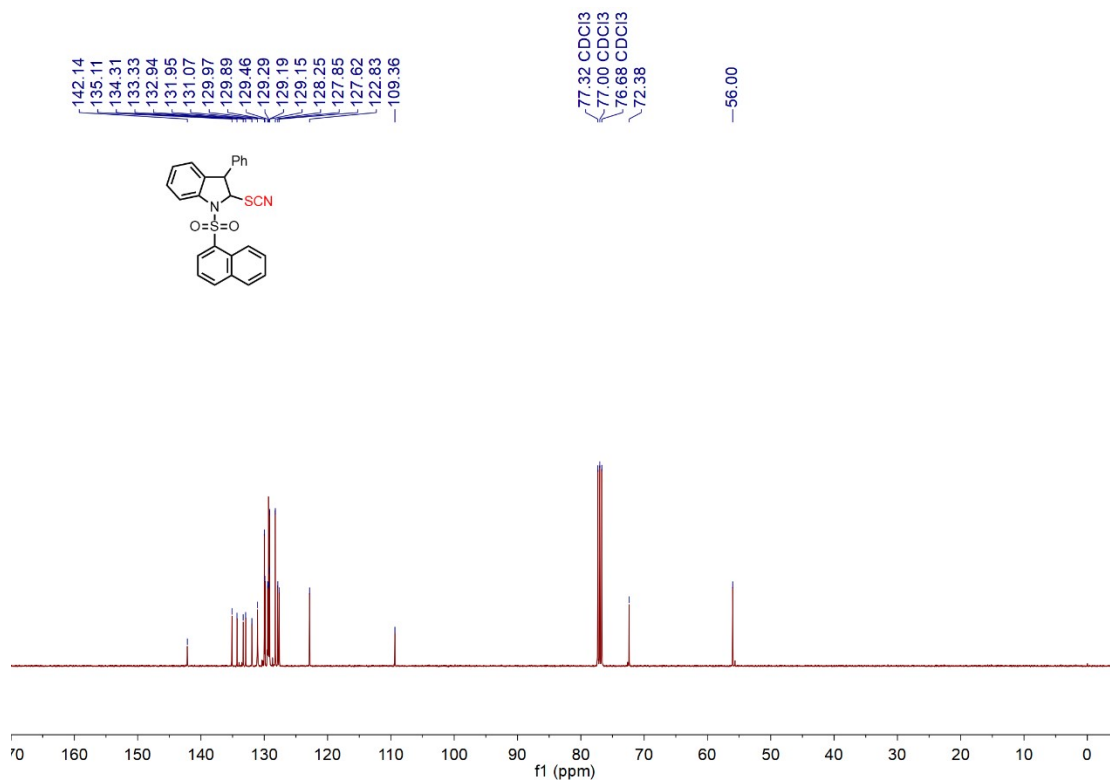

<sup>13</sup>C NMR Spectrum of Compound **7g** (100 MHz, CDCl<sub>3</sub>)

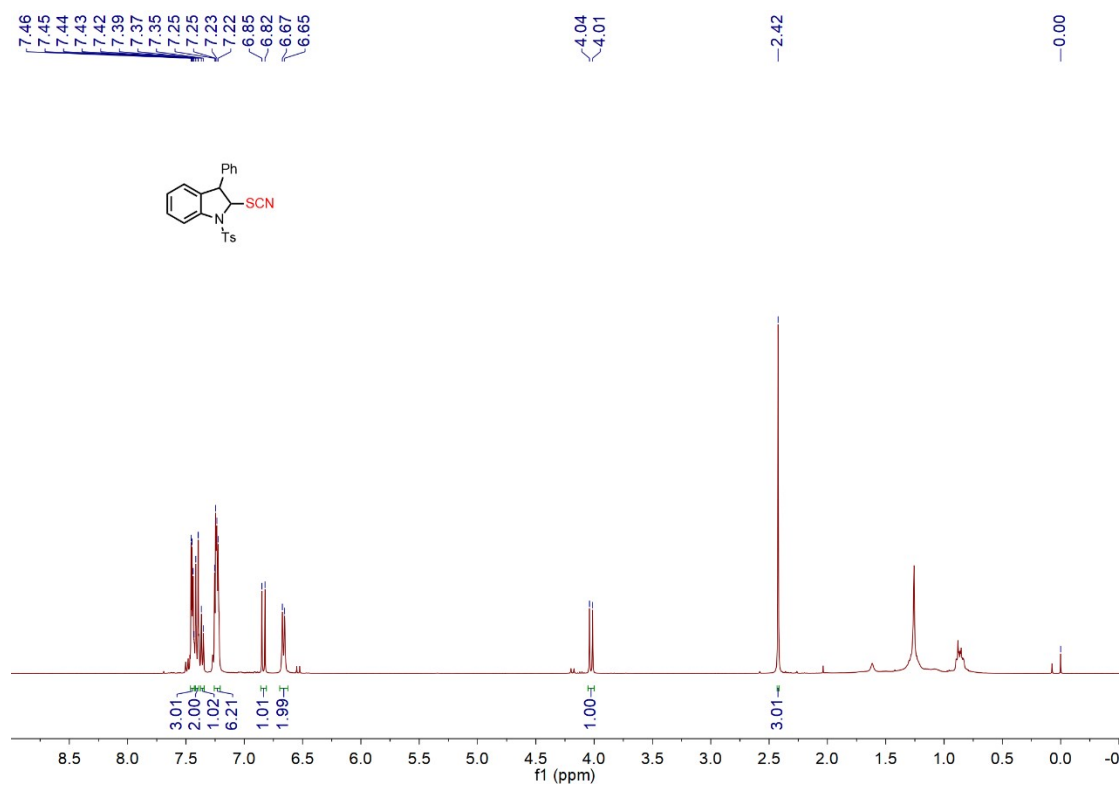

<sup>1</sup>H NMR Spectrum of Compound **7h** (400 MHz, CDCl<sub>3</sub>)

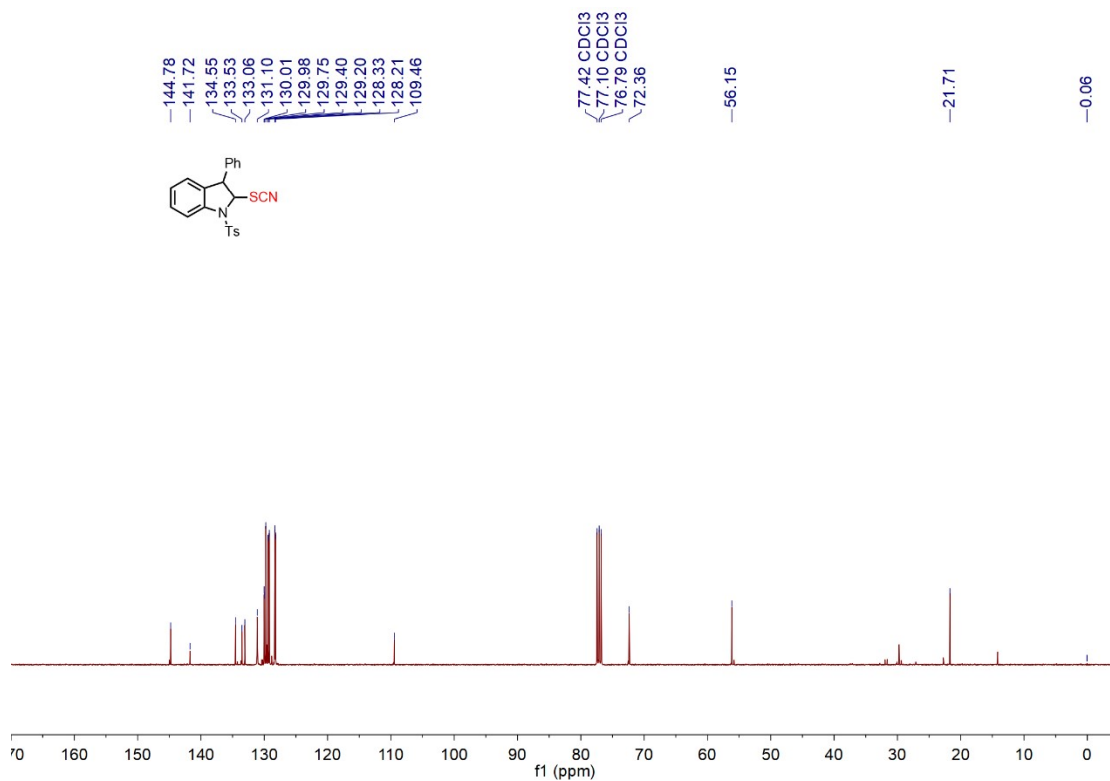

<sup>13</sup>C NMR Spectrum of Compound 7h (100 MHz, CDCl<sub>3</sub>)

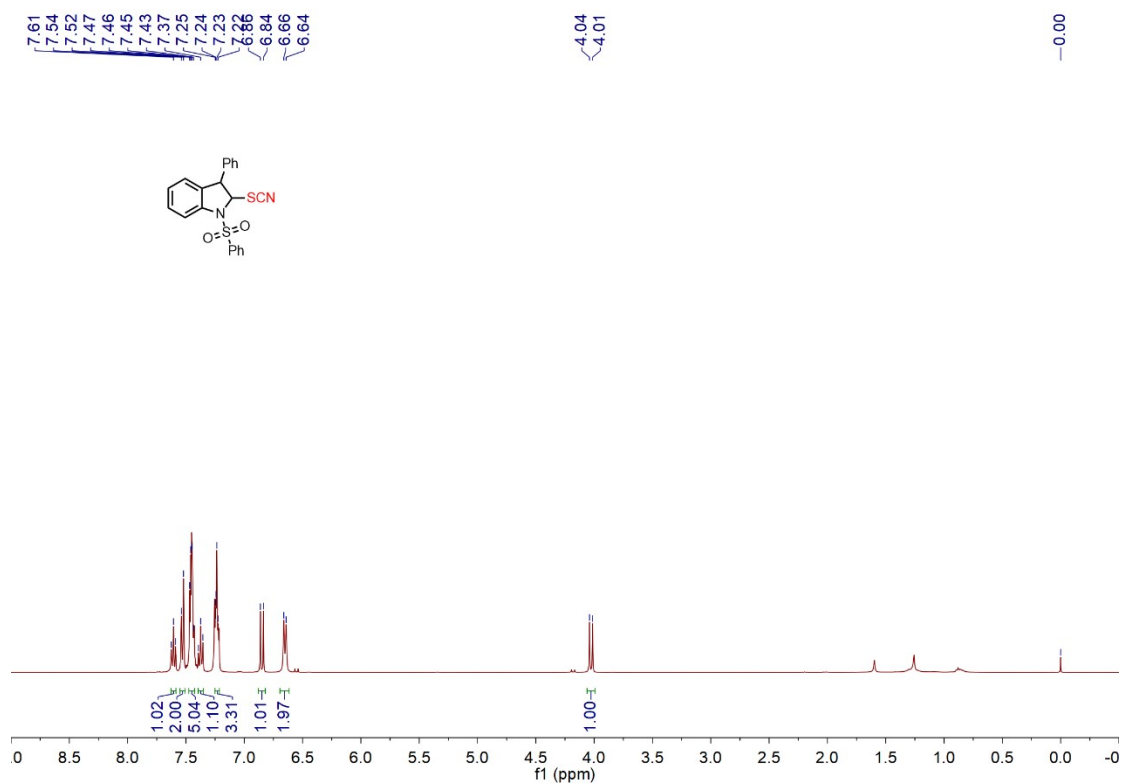

<sup>1</sup>H NMR Spectrum of Compound 7i (400 MHz, CDCl<sub>3</sub>)

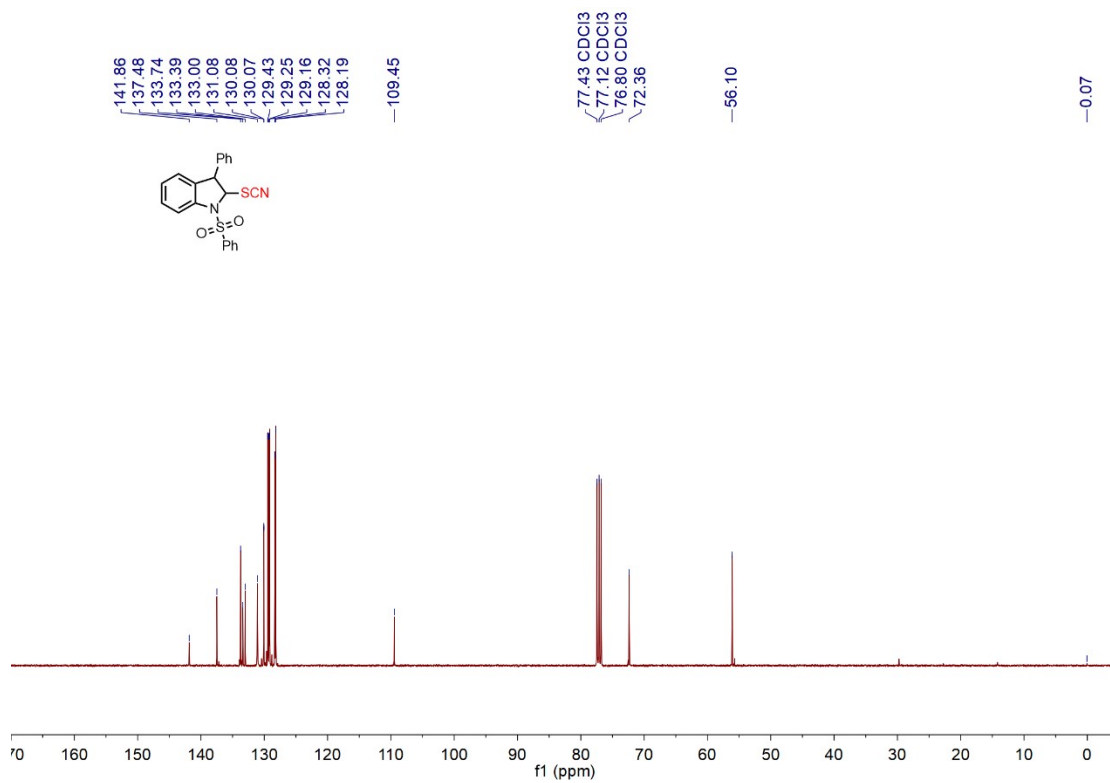

<sup>13</sup>C NMR Spectrum of Compound 7i (100 MHz, CDCl<sub>3</sub>)
